# Supplementary material for: Optical Study of Solvatochromic Isocyanoaminoanthracene Dyes and 1,5-Diaminoanthracene
Source: MDPI journal article supplement (doi:10.3390/ijms23031315), 2022-01-24
Supplement: s1 [file s1]

# Optical study of solvatochromic isocyanoaminoanthracene dyes and 1,5-diaminoanthracene

Miklós Nagy<sup>1, \*</sup>, Béla Fiser<sup>1</sup>, Milán Szóri<sup>1\*</sup>, László Vanyorek<sup>1</sup>, Béla Viskolcz<sup>1</sup>

<sup>1</sup> Institute of Chemistry, University of Miskolc, Miskolc-Egyetemváros, 3515-Hungary; kemfiser@uni-miskolc.hu (B.F.) kemvanyi@uni-miskolc.hu (L.V.); bela.viskolcz@uni-miskolc.hu (B.V.)

\* Correspondence: nagy.miklos@uni-miskolc.hu (M.N.); milan.szori@uni-miskolc.hu (M.S.)

## Supporting information

### Table of Contents

|                                                                                                                                                                                 |    |
|---------------------------------------------------------------------------------------------------------------------------------------------------------------------------------|----|
| Chapter 1. 1,5-diaminoanthracene (DAA).....                                                                                                                                     | 5  |
| <b>Figure S1.</b> The emission spectra of 1,5-diaminoanthracene ( <b>DAA</b> ) recorded in solvents of different polarity. (c= 5×10 <sup>-5</sup> M, T=20 °C, V=3.00 ml).....   | 5  |
| <b>Figure S2.</b> The excitation spectra of 1,5-diaminoanthracene ( <b>DAA</b> ) recorded in solvents of different polarity. (c= 5×10 <sup>-5</sup> M, T=20 °C, V=3.00 ml)..... | 5  |
| <b>Figure S3.</b> UV-Vis absorbance spectrum of DAA recorded in hexane .....                                                                                                    | 6  |
| <b>Figure S4.</b> UV-Vis absorbance spectrum of DAA recorded in toluene.....                                                                                                    | 6  |
| <b>Figure S5.</b> UV-Vis absorbance spectrum of DAA recorded in methylene-chloride .....                                                                                        | 7  |
| <b>Figure S6.</b> UV-Vis absorbance spectrum of DAA recorded in acetone .....                                                                                                   | 7  |
| <b>Figure S7.</b> UV-Vis absorbance spectrum of DAA recorded in methanol.....                                                                                                   | 8  |
| <b>Figure S8.</b> UV-Vis absorbance spectrum of DAA recorded in chloroform.....                                                                                                 | 8  |
| <b>Figure S9.</b> UV-Vis absorbance spectrum of DAA recorded in pyridine .....                                                                                                  | 9  |
| <b>Figure S10.</b> UV-Vis absorbance spectrum of DAA recorded in acetonitrile.....                                                                                              | 9  |
| <b>Figure S11.</b> UV-Vis absorbance spectrum of DAA recorded in 2-propanol .....                                                                                               | 10 |
| <b>Figure S12.</b> UV-Vis absorbance spectrum of DAA recorded in tetrahydrofuran .....                                                                                          | 10 |
| <b>Figure S13.</b> UV-Vis absorbance spectrum of DAA recorded in dioxane .....                                                                                                  | 11 |
| <b>Figure S14.</b> UV-Vis absorbance spectrum of DAA recorded in dimethylformamide .....                                                                                        | 11 |
| <b>Figure S15.</b> UV-Vis absorbance spectrum of DAA recorded in dimethyl sulfoxide.....                                                                                        | 12 |
| <b>Figure S16.</b> UV-Vis absorbance spectrum of DAA recorded in water .....                                                                                                    | 12 |
| Chapter 2. 1-amino-5-isocyanoanthracene (ICAA) .....                                                                                                                            | 13 |

|                                                 |                                                                                                                                                                    |    |
|-------------------------------------------------|--------------------------------------------------------------------------------------------------------------------------------------------------------------------|----|
| <b>Figure S17.</b>                              | $^1\text{H}$ -NMR (top) and $^{13}\text{C}$ -NMR (bottom) spectra of ICAA recorded at 20 °C in DMSO- $\text{d}_6$                                                  | 13 |
| <b>Figure S18.</b>                              | UV-Vis absorbance spectrum of ICAA recorded in acetone.....                                                                                                        | 14 |
| <b>Figure S19.</b>                              | UV-Vis absorbance spectrum of ICAA recorded in acetonitrile.....                                                                                                   | 14 |
| <b>Figure S20.</b>                              | UV-Vis absorbance spectrum of ICAA recorded in dichloromethane .....                                                                                               | 15 |
| <b>Figure S21.</b>                              | UV-Vis absorbance spectrum of ICAA recorded in 1,4-dioxane.....                                                                                                    | 15 |
| <b>Figure S22.</b>                              | UV-Vis absorbance spectrum of ICAA recorded in DMF .....                                                                                                           | 16 |
| <b>Figure S23.</b>                              | UV-Vis absorbance spectrum of ICAA recorded in DMSO .....                                                                                                          | 16 |
| <b>Figure S24.</b>                              | UV-Vis absorbance spectrum of ICAA recorded in ethyl acetate.....                                                                                                  | 17 |
| <b>Figure S25.</b>                              | UV-Vis absorbance spectrum of ICAA recorded in hexane .....                                                                                                        | 17 |
| <b>Figure S26.</b>                              | UV-Vis absorbance spectrum of ICAA recorded in 2-propanol .....                                                                                                    | 18 |
| <b>Figure S27.</b>                              | UV-Vis absorbance spectrum of ICAA recorded in chloroform.....                                                                                                     | 18 |
| <b>Figure S28.</b>                              | UV-Vis absorbance spectrum of ICAA recorded in methanol.....                                                                                                       | 19 |
| <b>Figure S29.</b>                              | UV-Vis absorbance spectrum of ICAA recorded in pyridine .....                                                                                                      | 19 |
| <b>Figure S30.</b>                              | UV-Vis absorbance spectrum of ICAA recorded in THF .....                                                                                                           | 20 |
| <b>Figure S31.</b>                              | UV-Vis absorbance spectrum of ICAA recorded in toluene .....                                                                                                       | 20 |
| <b>Figure S32.</b>                              | UV-Vis absorbance spectrum of ICAA recorded in water.....                                                                                                          | 21 |
| <b>Figure S33.</b>                              | The emission spectra of 1-amino-5-isocyanoanthracene (ICAA) recorded in solvents of different polarity. ( $c= 5\times 10^{-5}$ M, $T=20$ °C, $V=3.00$ ml). .....   | 22 |
| <b>Figure S34.</b>                              | The excitation spectra of 1-amino-5-isocyanoanthracene (ICAA) recorded in solvents of different polarity. ( $c= 5\times 10^{-5}$ M, $T=20$ °C, $V=3.00$ ml). ..... | 22 |
| Chapter 3. 1,5-diisocyanoanthracene (DIA) ..... |                                                                                                                                                                    | 23 |
| <b>Figure S35.</b>                              | $^1\text{H}$ -NMR spectrum of DIA recorded at 20 °C in DMSO- $\text{d}_6$ .....                                                                                    | 23 |
| <b>Figure S36.</b>                              | UV-Vis absorbance spectrum of DIA recorded in acetone .....                                                                                                        | 23 |
| <b>Figure S37.</b>                              | UV-Vis absorbance spectrum of DIA recorded in acetonitrile .....                                                                                                   | 24 |
| <b>Figure S38.</b>                              | UV-Vis absorbance spectrum of DIA recorded in dichloromethane.....                                                                                                 | 24 |
| <b>Figure S39.</b>                              | UV-Vis absorbance spectrum of DIA recorded in 1,4-dioxane .....                                                                                                    | 25 |
| <b>Figure S40.</b>                              | UV-Vis absorbance spectrum of DIA recorded in DMF.....                                                                                                             | 25 |
| <b>Figure S41.</b>                              | UV-Vis absorbance spectrum of DIA recorded in DMSO .....                                                                                                           | 26 |
| <b>Figure S42.</b>                              | UV-Vis absorbance spectrum of DIA recorded in ethyl acetate .....                                                                                                  | 26 |
| <b>Figure S43.</b>                              | UV-Vis absorbance spectrum of DIA recorded in hexane .....                                                                                                         | 27 |
| <b>Figure S44.</b>                              | UV-Vis absorbance spectrum of DIA recorded in 2-propanol.....                                                                                                      | 27 |
| <b>Figure S45.</b>                              | UV-Vis absorbance spectrum of DIA recorded in chloroform .....                                                                                                     | 28 |
| <b>Figure S46.</b>                              | UV-Vis absorbance spectrum of DIA recorded in methanol.....                                                                                                        | 28 |

|                                                                     |                                                                                                                                                                                  |    |
|---------------------------------------------------------------------|----------------------------------------------------------------------------------------------------------------------------------------------------------------------------------|----|
| <b>Figure S47.</b>                                                  | UV-Vis absorbance spectrum of DIA recorded in pyridine .....                                                                                                                     | 29 |
| <b>Figure S48.</b>                                                  | UV-Vis absorbance spectrum of DIA recorded in THF.....                                                                                                                           | 29 |
| <b>Figure S49.</b>                                                  | UV-Vis absorbance spectrum of DIA recorded in toluene.....                                                                                                                       | 30 |
| <b>Figure S50.</b>                                                  | UV-Vis absorbance spectrum of DIA recorded in water.....                                                                                                                         | 30 |
| <b>Figure S51.</b>                                                  | The emission spectra of 1,5-diisocyanoanthracene ( <b>DIA</b> ) recorded in solvents of different polarity. ( $c= 5 \times 10^{-5}$ M, $T=20$ °C, $V=3.00$ ml).....              | 31 |
| <b>Figure S52.</b>                                                  | The excitation spectra of 1,5-diisocyanoanthracene ( <b>DIA</b> ) recorded in solvents of different polarity. ( $c= 5 \times 10^{-5}$ M, $T=20$ °C, $V=3.00$ ml).....            | 31 |
| Chapter IV. 1-N-methylamino-5-isocyanoanthracene (MICAA) .....      |                                                                                                                                                                                  | 33 |
| <b>Figure S53.</b>                                                  | $^1\text{H}$ -NMR spectra of MICAA recorded at $20$ °C in $\text{CDCl}_3$ .....                                                                                                  | 33 |
| <b>Figure S54.</b>                                                  | UV-Vis absorbance spectrum of MICAA recorded in acetone .....                                                                                                                    | 34 |
| <b>Figure S55.</b>                                                  | UV-Vis absorbance spectrum of MICAA recorded in acetonitrile .....                                                                                                               | 34 |
| <b>Figure S56.</b>                                                  | UV-Vis absorbance spectrum of MICAA recorded in dichloromethane .....                                                                                                            | 35 |
| <b>Figure S57.</b>                                                  | Dioxane UV-Vis absorbance spectrum of MICAA recorded in dioxane .....                                                                                                            | 35 |
| <b>Figure S58.</b>                                                  | UV-Vis absorbance spectrum of MICAA recorded in DMF.....                                                                                                                         | 35 |
| <b>Figure S59.</b>                                                  | UV-Vis absorbance spectrum of MICAA recorded in DMSO.....                                                                                                                        | 36 |
| <b>Figure S60.</b>                                                  | UV-Vis absorbance spectrum of MICAA recorded in ethyl-acetate.....                                                                                                               | 37 |
| <b>Figure S61.</b>                                                  | UV-Vis absorbance spectrum of MICAA recorded in hexane.....                                                                                                                      | 37 |
| <b>Figure S62.</b>                                                  | UV-Vis absorbance spectrum of MICAA recorded in isopropanole.....                                                                                                                | 37 |
| <b>Figure S63.</b>                                                  | UV-Vis absorbance spectrum of MICAA recorded in chloroform .....                                                                                                                 | 38 |
| <b>Figure S64.</b>                                                  | UV-Vis absorbance spectrum of MICAA recorded in methanol .....                                                                                                                   | 38 |
| <b>Figure S65.</b>                                                  | UV-Vis absorbance spectrum of MICAA recorded in pyridine.....                                                                                                                    | 39 |
| <b>Figure S66.</b>                                                  | UV-Vis absorbance spectrum of MICAA recorded in tetrahydrofurane.....                                                                                                            | 39 |
| <b>Figure S67.</b>                                                  | UV-Vis absorbance spectrum of MICAA recorded in toluene .....                                                                                                                    | 40 |
| <b>Figure S68.</b>                                                  | UV-Vis absorbance spectrum of MICAA recorded in water .....                                                                                                                      | 40 |
| <b>Figure S69.</b>                                                  | The emission spectra of 1-N-methylamino-5-isocyanoanthracene (MICAA) recorded in solvents of different polarity. ( $c= 5 \times 10^{-5}$ M, $T=20$ °C, $V=3.00$ ml). .....       | 41 |
| <b>Figure S70.</b>                                                  | The excitation spectra of 1-N-methylamino-5-isocyanoanthracene (MICAA) recorded in solvents of different polarity. ( $c= 5 \times 10^{-5}$ M, $T=20$ °C, $V=3.00$ ml). .....     | 41 |
| Chapter V. 1-N,N-dimethylamino-5-isocyanoanthracene (DIMICAA) ..... |                                                                                                                                                                                  | 42 |
| <b>Figure S71.</b>                                                  | $^1\text{H}$ -NMR (top) and $^{13}\text{C}$ -NMR (bottom) spectra of 1-N,N-dimethylamino-5-isocyanoanthracene (DIMICAA) recorded at $20$ °C in $\text{CDCl}_3$ .....             | 42 |
| <b>Figure S72.</b>                                                  | The emission spectra of 1-N,N-dimethylamino-5-isocyanoanthracene (DIMICAA) recorded in solvents of different polarity. ( $c= 5 \times 10^{-5}$ M, $T=20$ °C, $V=3.00$ ml). ..... | 43 |

|                    |                                                                                                                                                                                                 |    |
|--------------------|-------------------------------------------------------------------------------------------------------------------------------------------------------------------------------------------------|----|
| <b>Figure S73.</b> | The excitation spectra of 1-N,N-dimethylamino-5-isocyanoanthracene (DIMICAA) recorded in solvents of different polarity. ( $c= 5 \times 10^{-5}$ M, $T=20$ °C, $V=3.00$ ml).....                | 43 |
| <b>Figure S74.</b> | The UV-vis spectrum of (DIMICAA) recorded in acetone.....                                                                                                                                       | 44 |
| <b>Figure S75.</b> | The UV-vis spectrum of (DIMICAA) recorded in acetonitrile .....                                                                                                                                 | 45 |
| <b>Figure S76.</b> | The UV-vis spectrum of (DIMICAA) recorded in methylene-chloride .....                                                                                                                           | 45 |
| <b>Figure S77.</b> | Dioxane The UV-vis spectrum of (DIMICAA) recorded in dioxane.....                                                                                                                               | 46 |
| <b>Figure S78.</b> | The UV-vis spectrum of (DIMICAA) recorded in DMF .....                                                                                                                                          | 46 |
| <b>Figure S79.</b> | The UV-vis spectrum of (DIMICAA) recorded in DMSO .....                                                                                                                                         | 46 |
| <b>Figure S80.</b> | The UV-vis spectrum of (DIMICAA) recorded in EtOAc .....                                                                                                                                        | 47 |
| <b>Figure S81.</b> | The UV-vis spectrum of (DIMICAA) recorded in hexane.....                                                                                                                                        | 47 |
| <b>Figure S82.</b> | The UV-vis spectrum of (DIMICAA) recorded in isopropanol .....                                                                                                                                  | 48 |
| <b>Figure S83.</b> | The UV-vis spectrum of (DIMICAA) recorded in chloroform .....                                                                                                                                   | 48 |
| <b>Figure S84.</b> | The UV-vis spectrum of (DIMICAA) recorded in methanol .....                                                                                                                                     | 49 |
| <b>Figure S85.</b> | The UV-vis spectrum of (DIMICAA) recorded in pyridine.....                                                                                                                                      | 49 |
| <b>Figure S86.</b> | The UV-vis spectrum of (DIMICAA) recorded in tetrahydrofurane.....                                                                                                                              | 51 |
| <b>Figure S87.</b> | The UV-vis spectrum of (DIMICAA) recorded in toluene .....                                                                                                                                      | 51 |
| <b>Figure S88.</b> | The UV-vis spectrum of (DIMICAA) recorded in water .....                                                                                                                                        | 51 |
| <b>Figure S89.</b> | Variation of the fluorescence emission maximum with the empirical solvent polarity parameter $E_T(30)$ (a) and the Lippert-Mataga (LM) (b) plots for the 1,5-disubstituted anthracene dyes..... | 52 |

## Chapter 1. 1,5-diaminoanthracene (DAA)

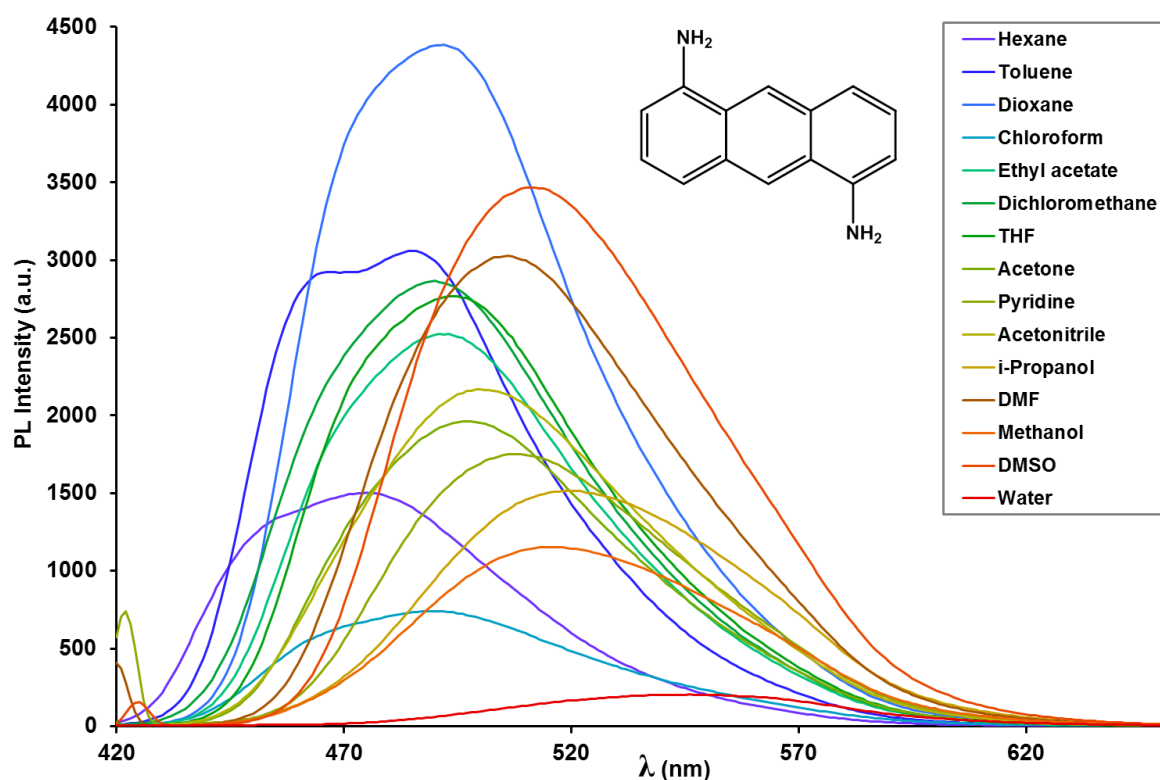

**Figure S1.** The emission spectra of 1,5-diaminoanthracene (**DAA**) recorded in solvents of different polarity. ( $c=5\times 10^{-5}$  M,  $T=20$  °C,  $V=3.00$  ml).

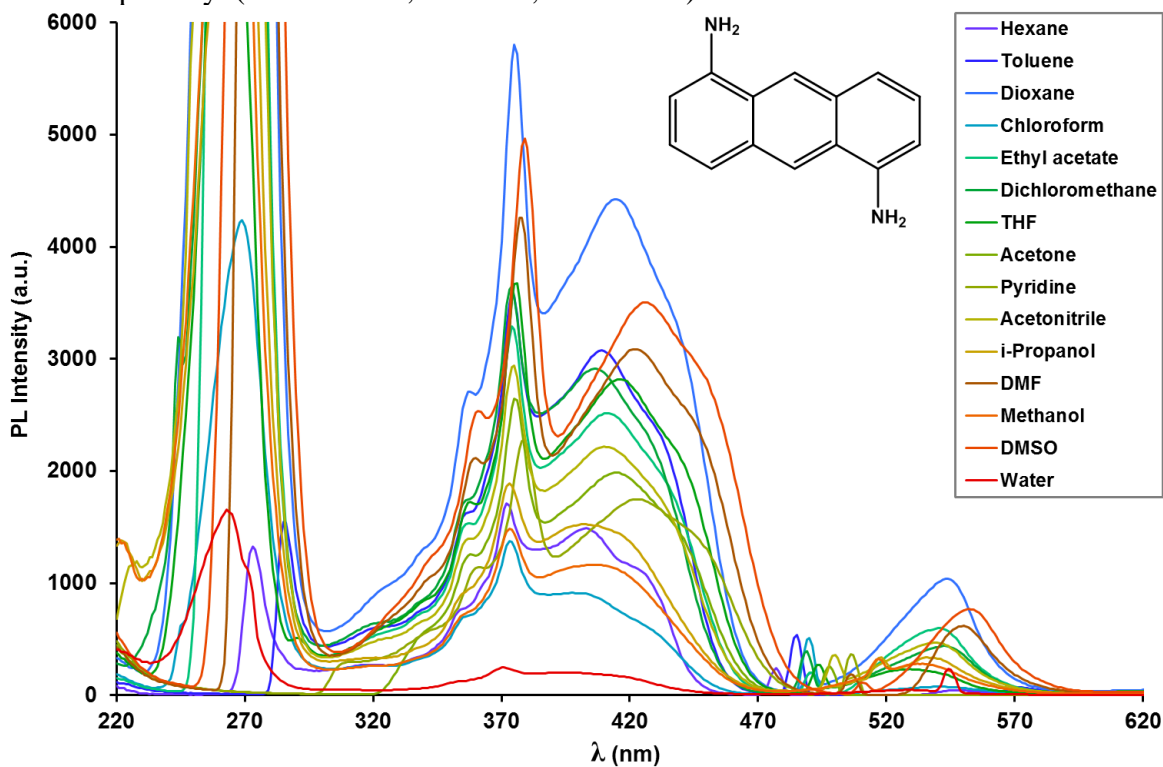

**Figure S2.** The excitation spectra of 1,5-diaminoanthracene (**DAA**) recorded in solvents of different polarity. ( $c=5\times 10^{-5}$  M,  $T=20$  °C,  $V=3.00$  ml).

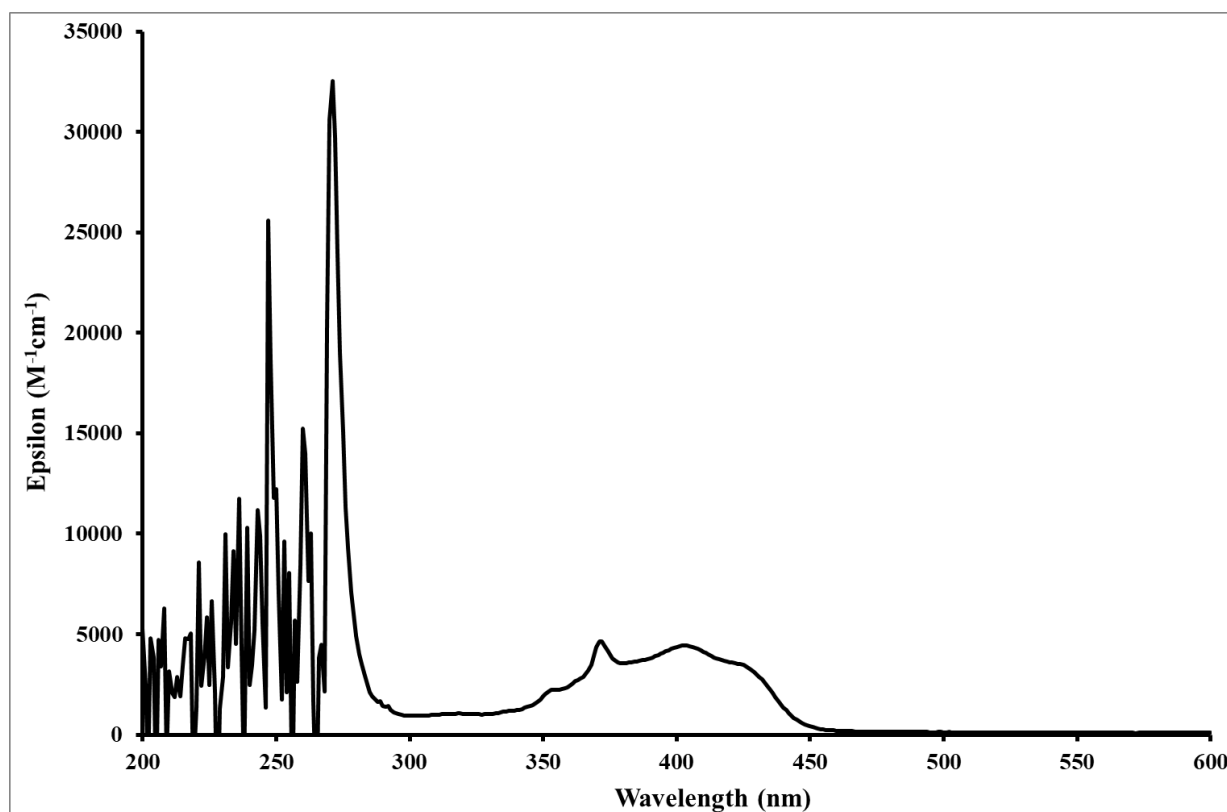

**Figure S3.** UV-Vis absorbance spectrum of DAA recorded in hexane

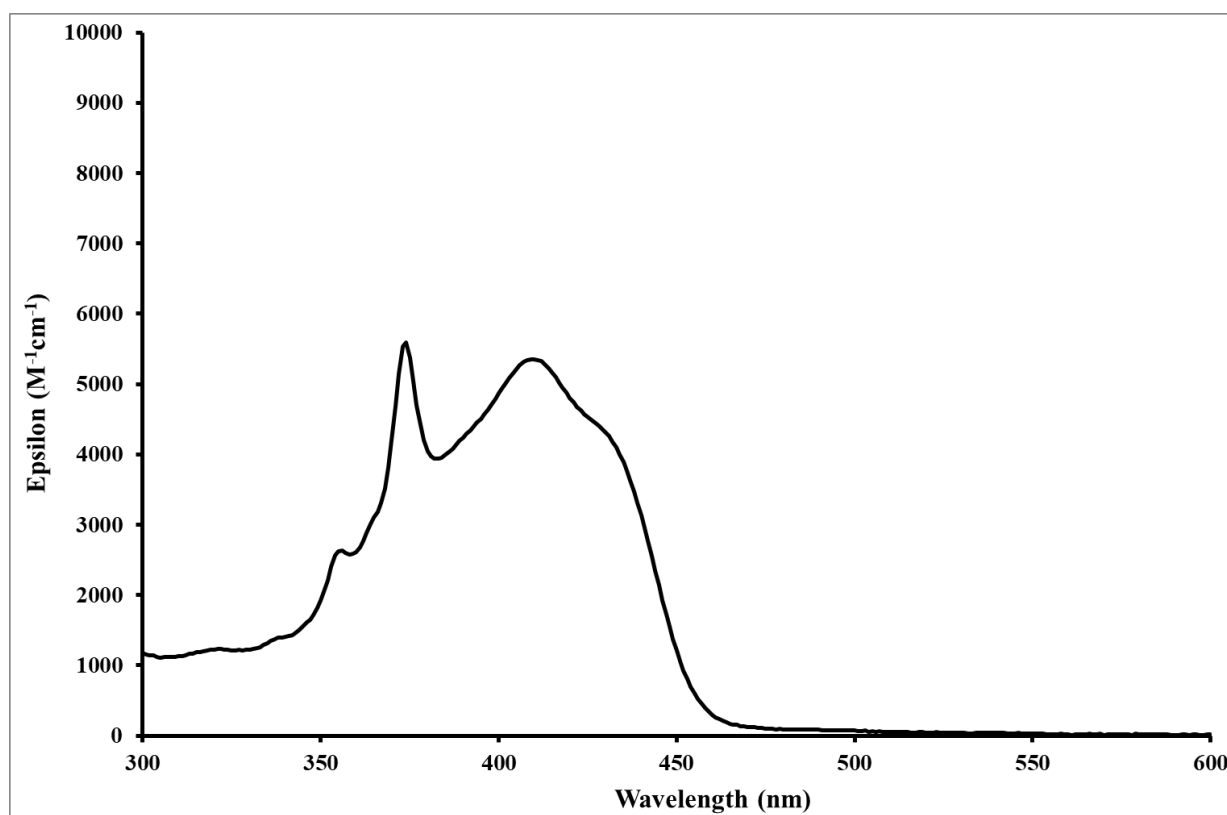

**Figure S4.** UV-Vis absorbance spectrum of DAA recorded in toluene

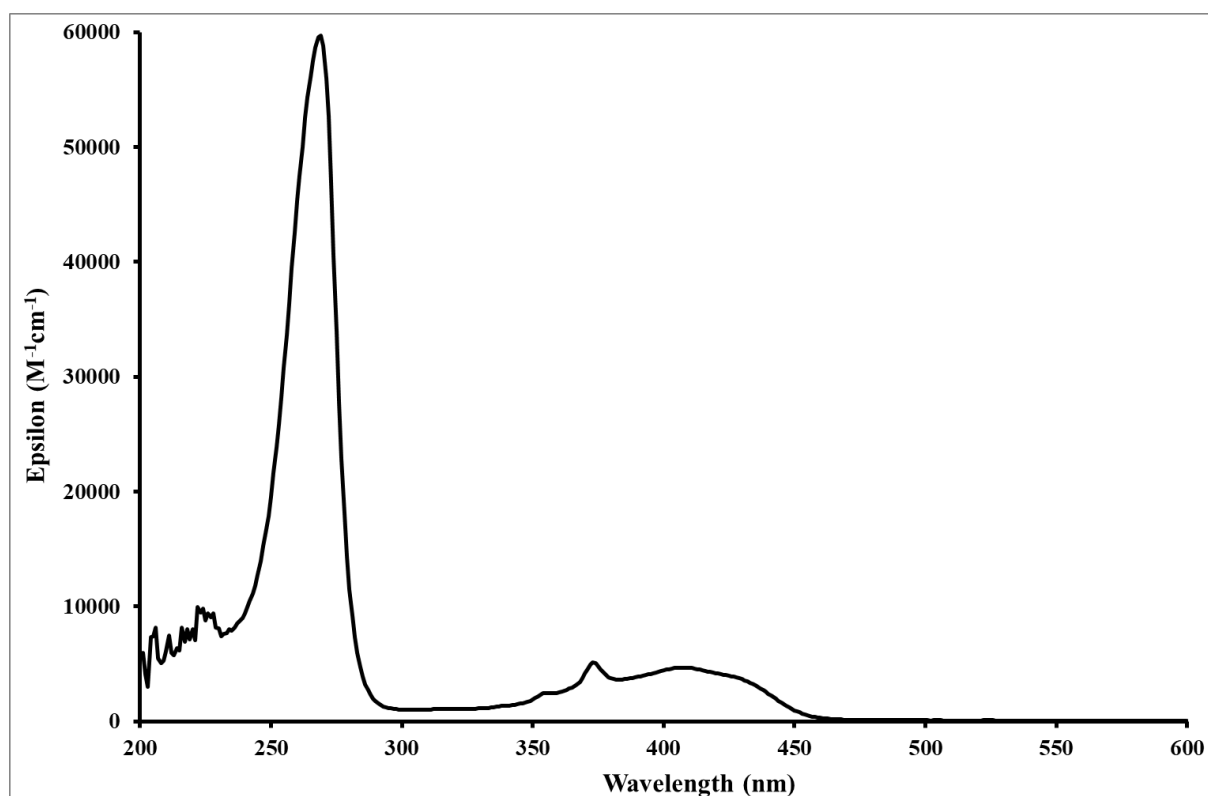

**Figure S5.** UV-Vis absorbance spectrum of DAA recorded in methylene-chloride

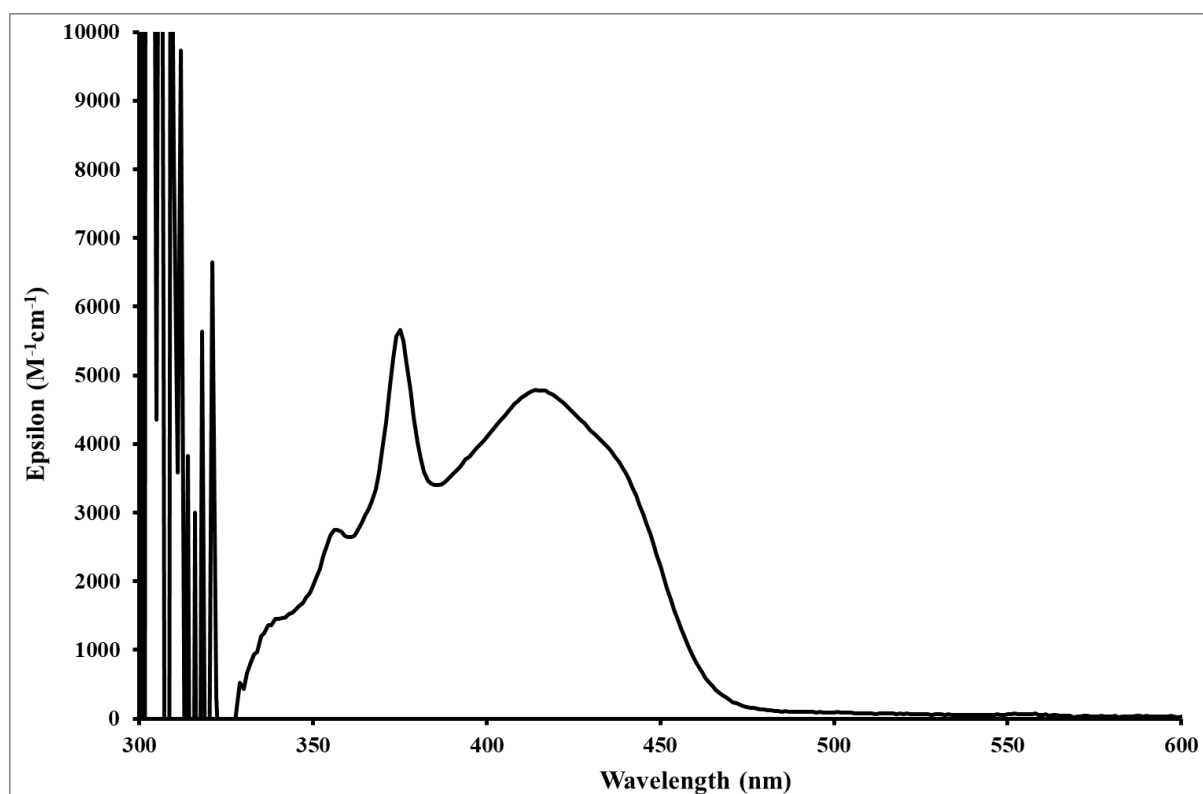

**Figure S6.** UV-Vis absorbance spectrum of DAA recorded in acetone

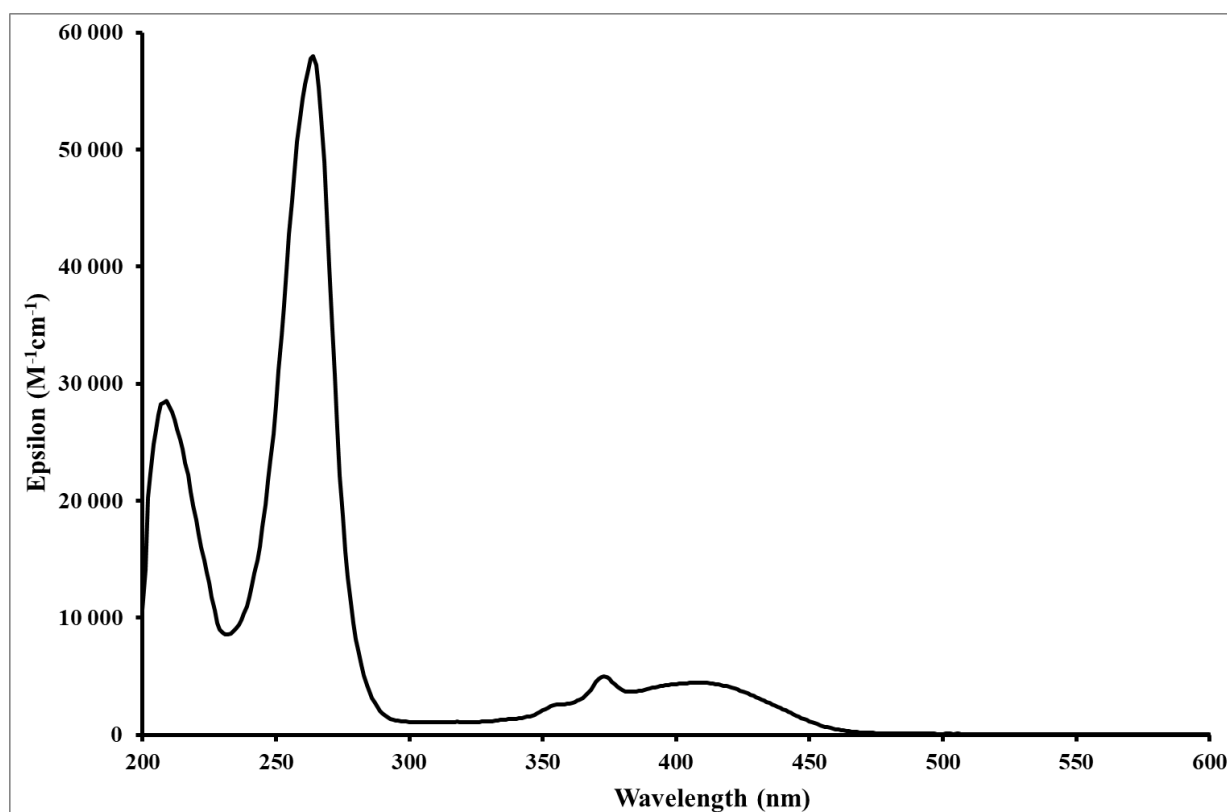

**Figure S7.** UV-Vis absorbance spectrum of DAA recorded in methanol

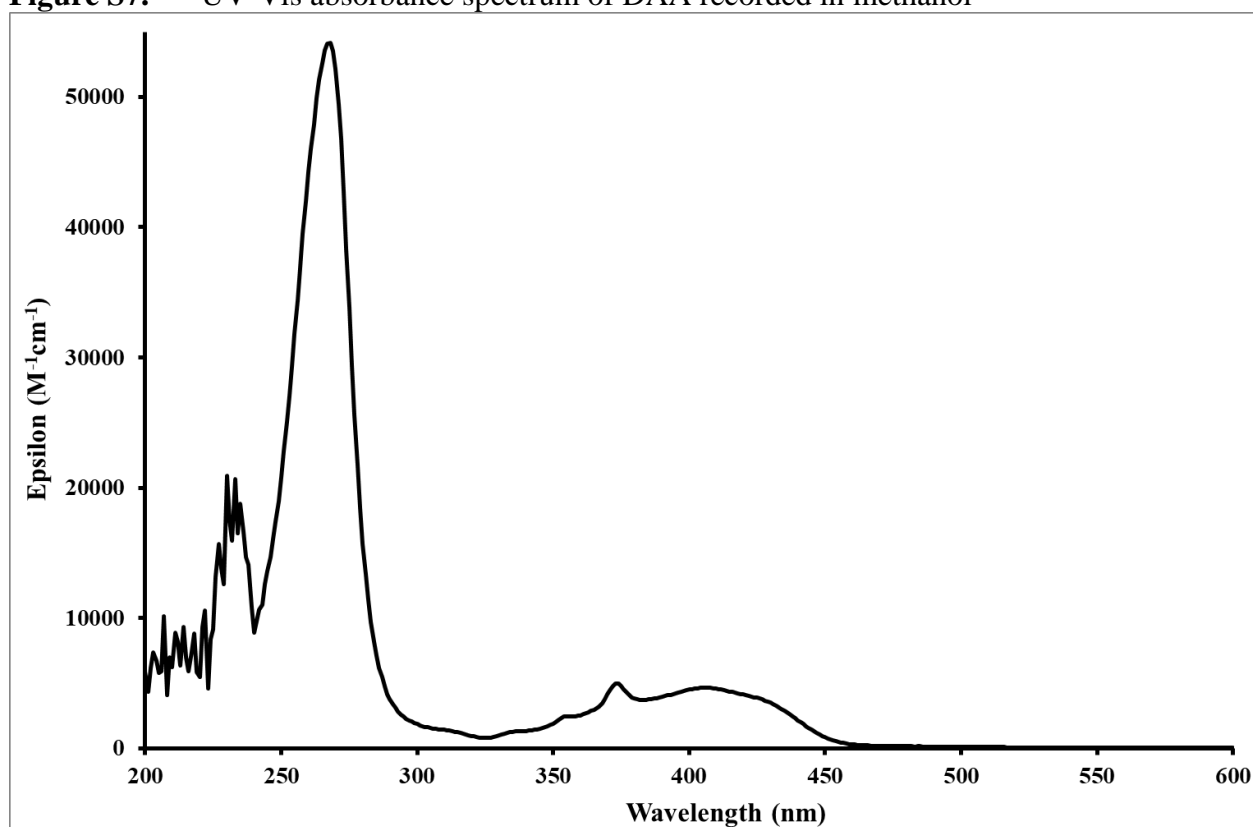

**Figure S8.** UV-Vis absorbance spectrum of DAA recorded in chloroform



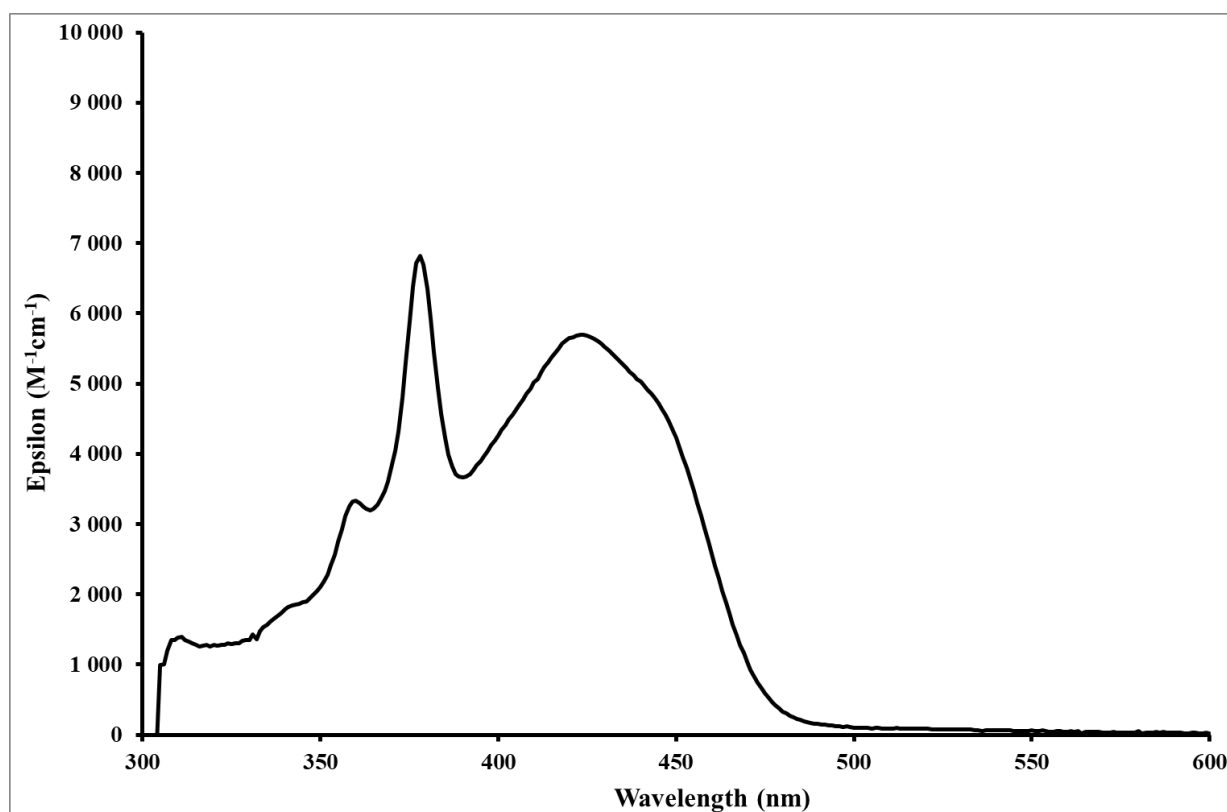

**Figure S9.** UV-Vis absorbance spectrum of DAA recorded in pyridine

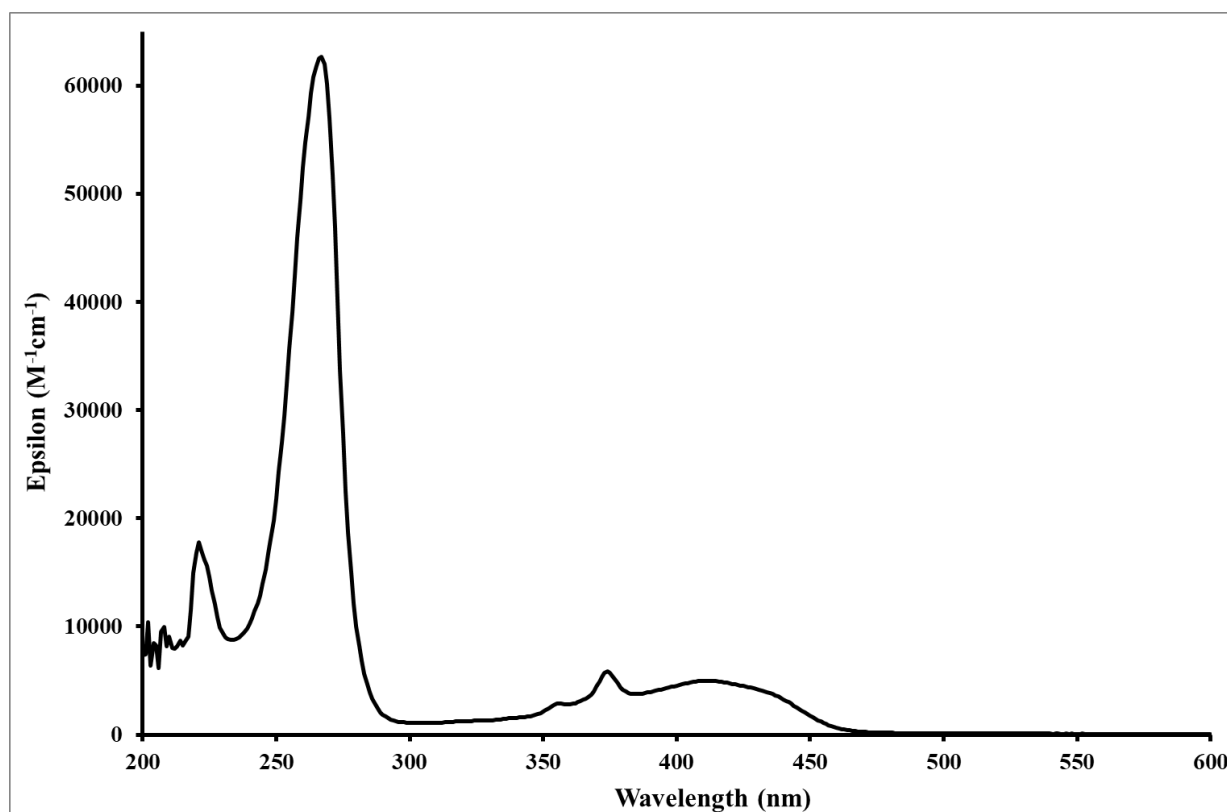

**Figure S10.** UV-Vis absorbance spectrum of DAA recorded in acetonitrile

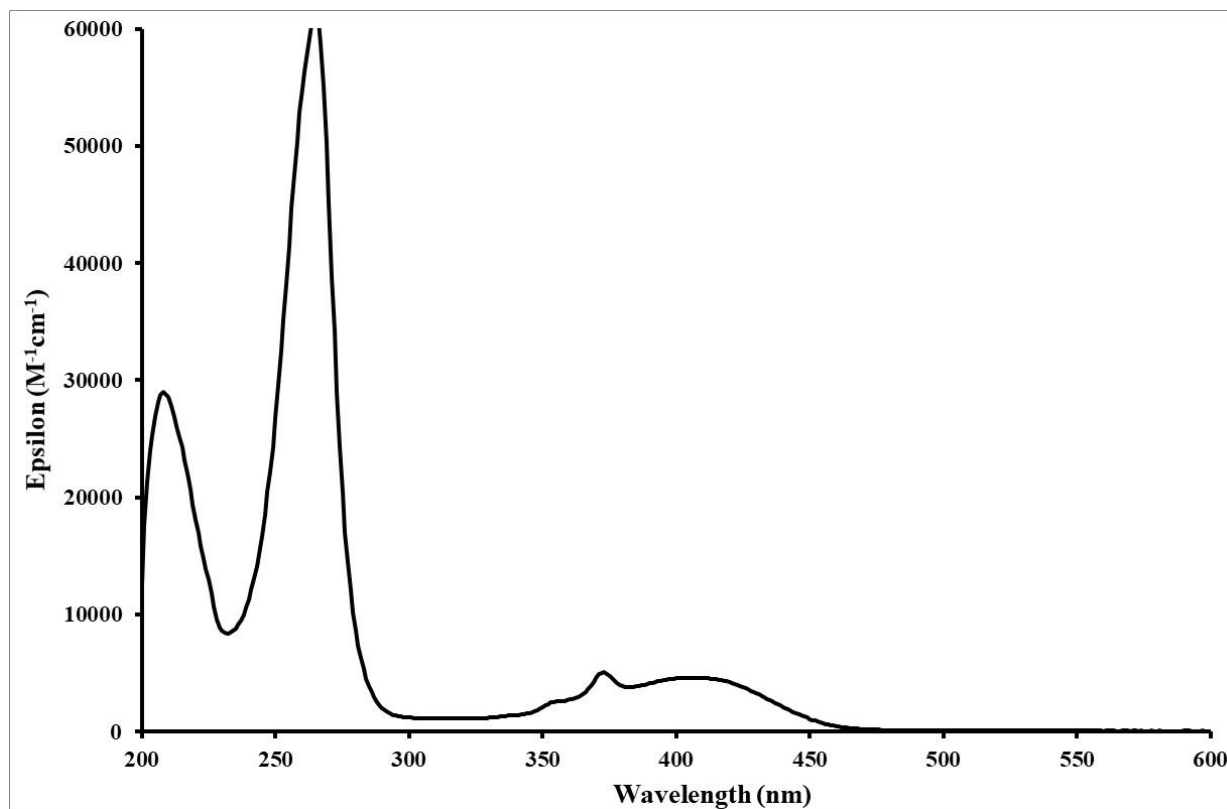

**Figure S11.** UV-Vis absorbance spectrum of DAA recorded in 2-propanol

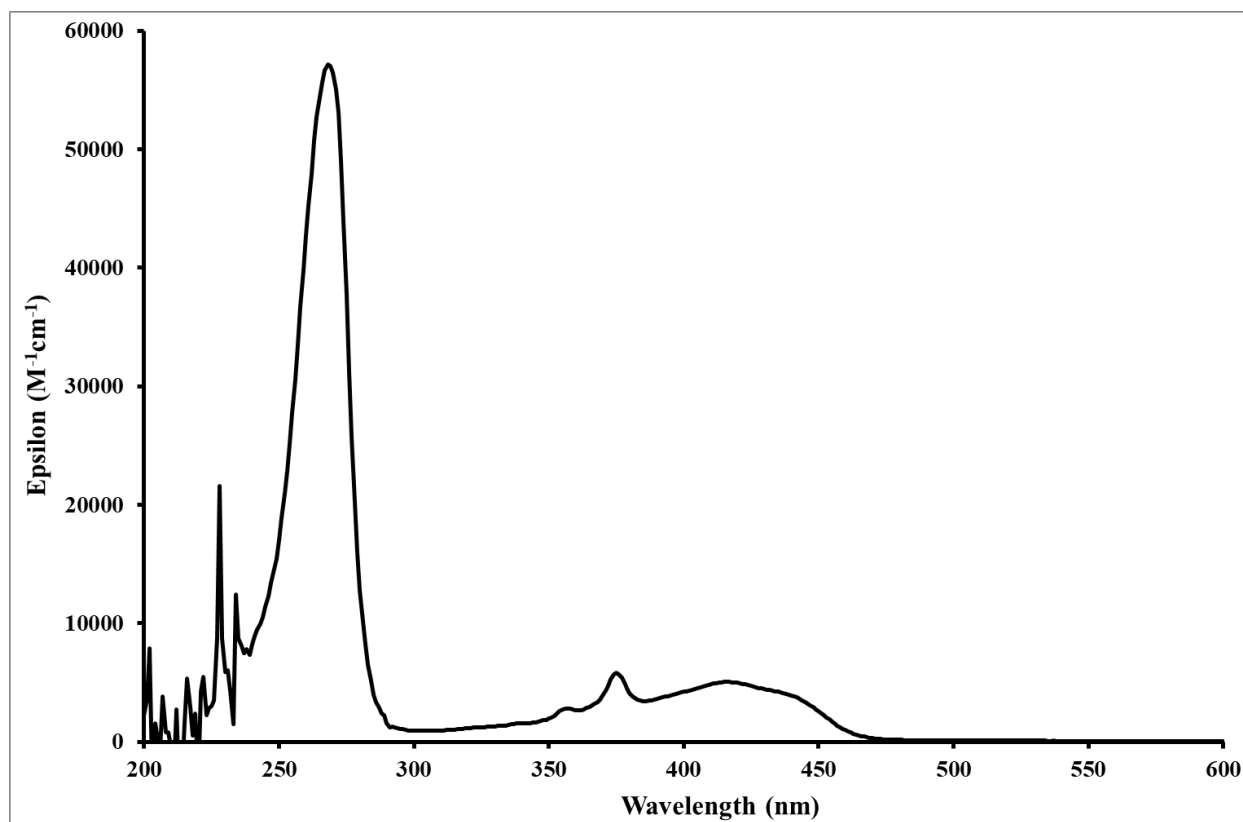

**Figure S12.** UV-Vis absorbance spectrum of DAA recorded in tetrahydrofuran

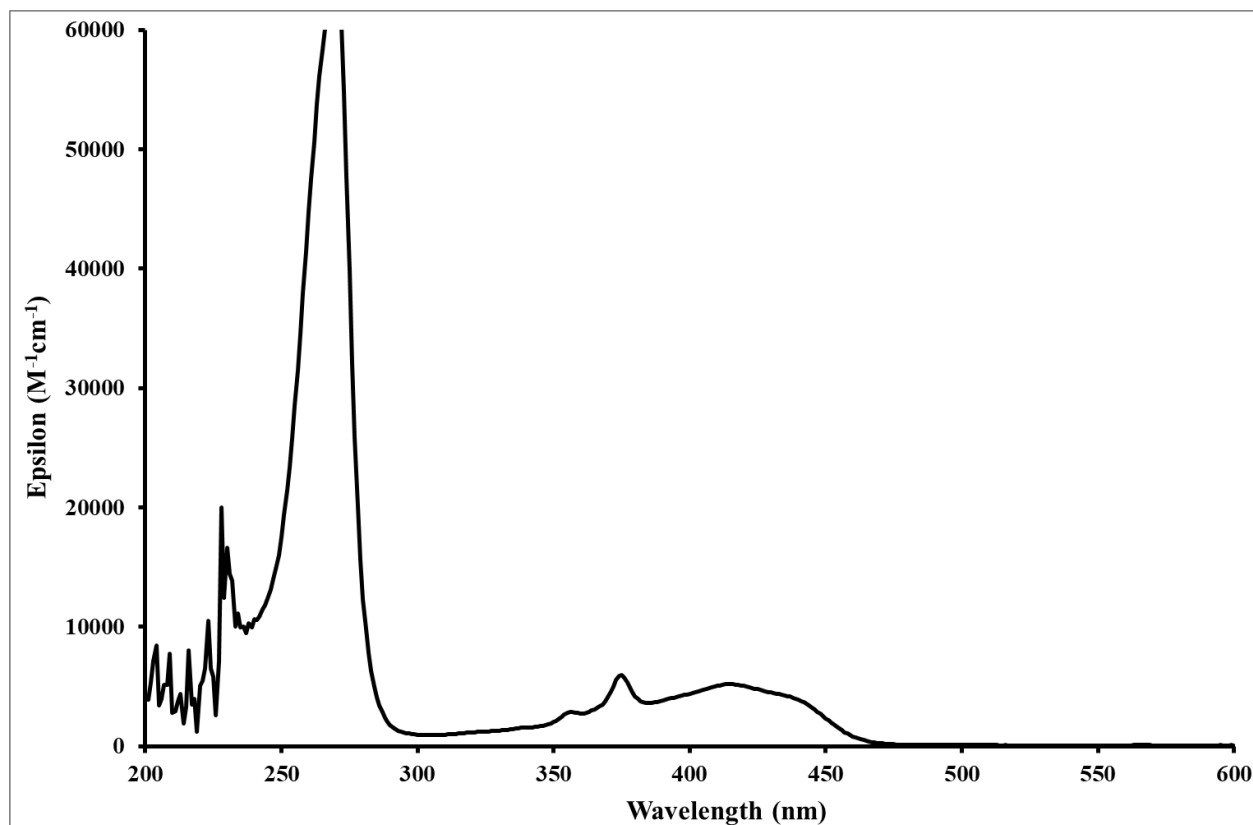

**Figure S13.** UV-Vis absorbance spectrum of DAA recorded in dioxane

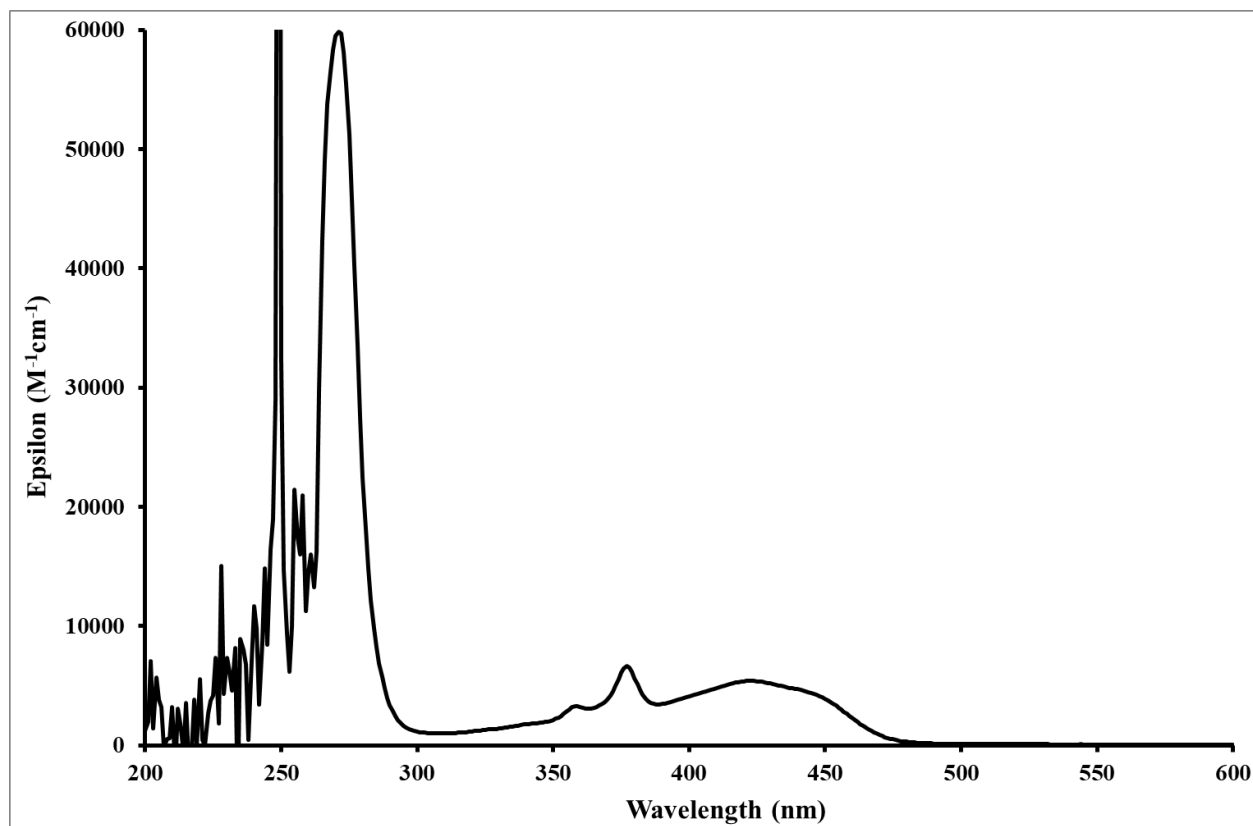

**Figure S14.** UV-Vis absorbance spectrum of DAA recorded in dimethylformamide

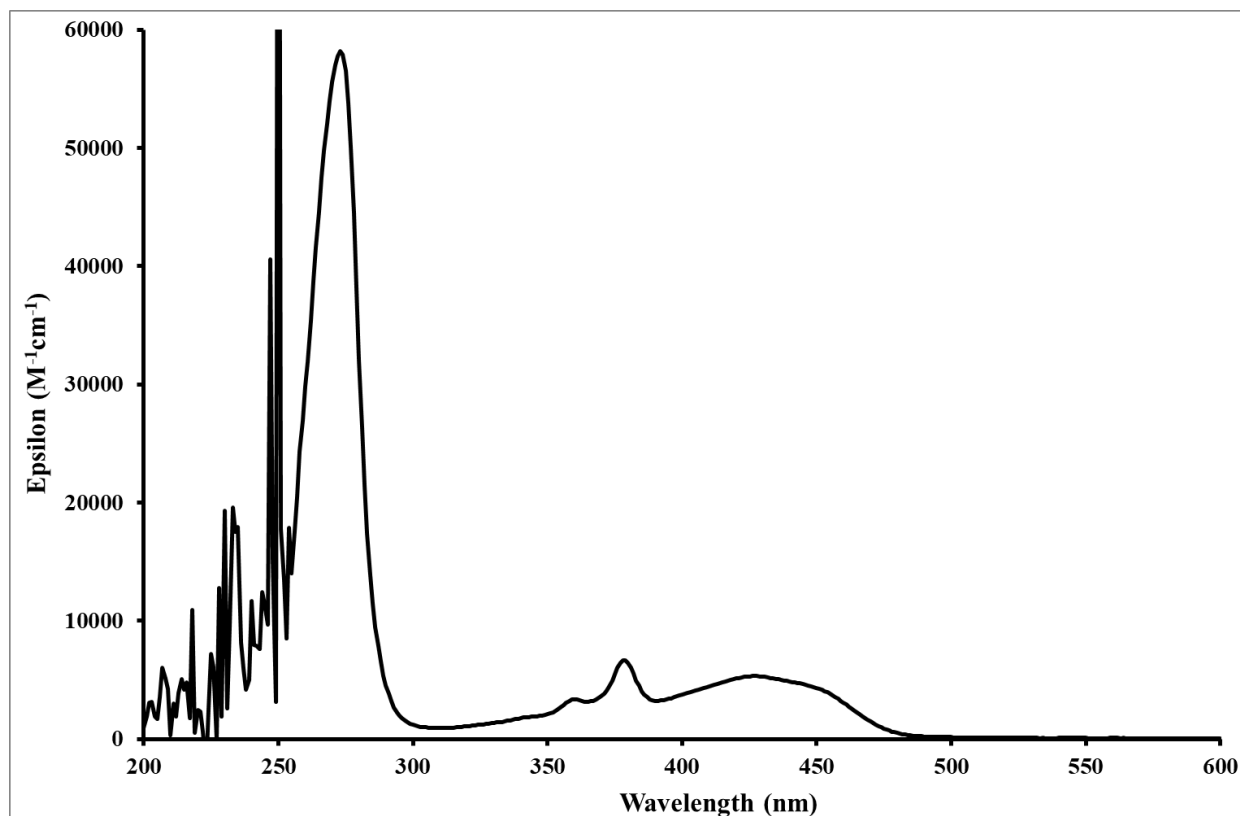

**Figure S15.** UV-Vis absorbance spectrum of DAA recorded in dimethyl sulfoxide

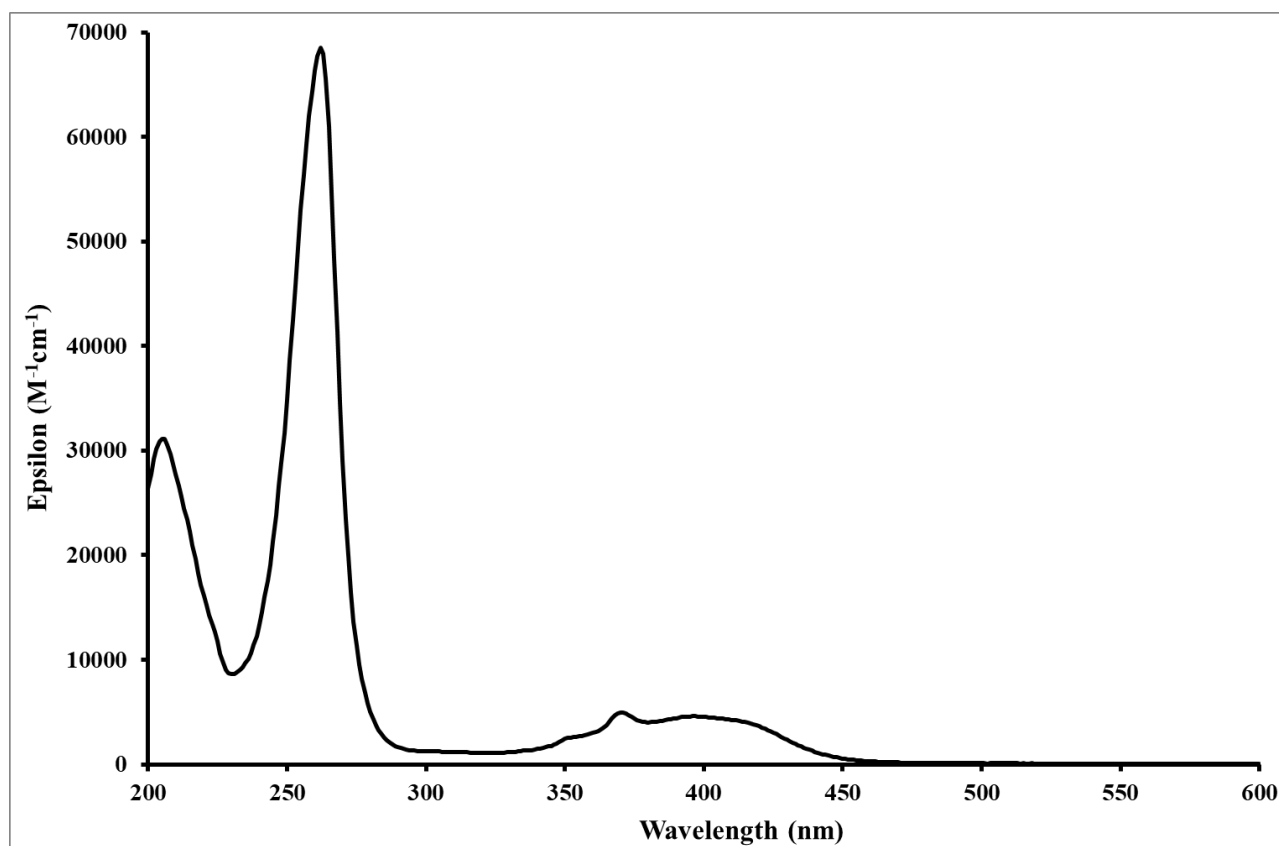

**Figure S16.** UV-Vis absorbance spectrum of DAA recorded in water

## Chapter 2. 1-amino-5-isocyanoanthracene (ICAA)

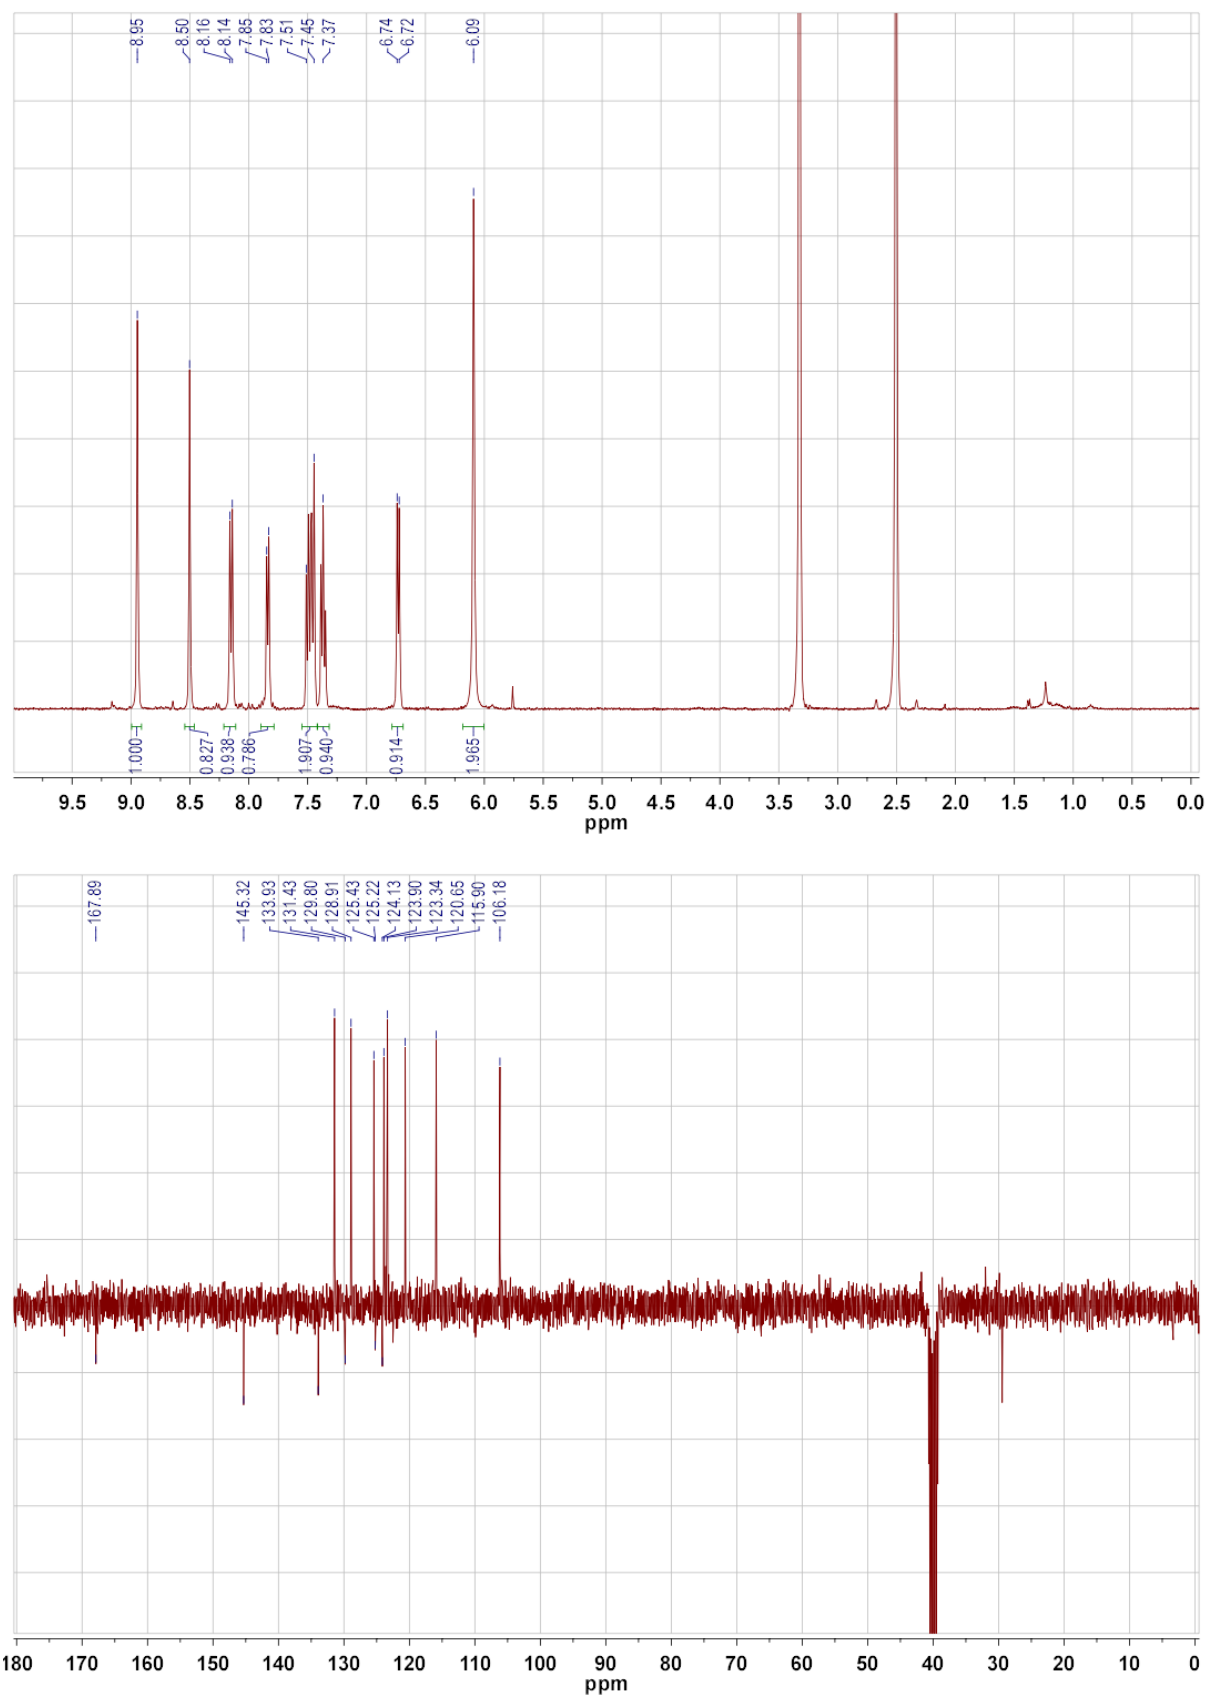

**Figure S17.**  $^1\text{H}$ -NMR (top) and  $^{13}\text{C}$ -NMR (bottom) spectra of ICAA recorded at 20 °C in  $\text{DMSO-d}_6$

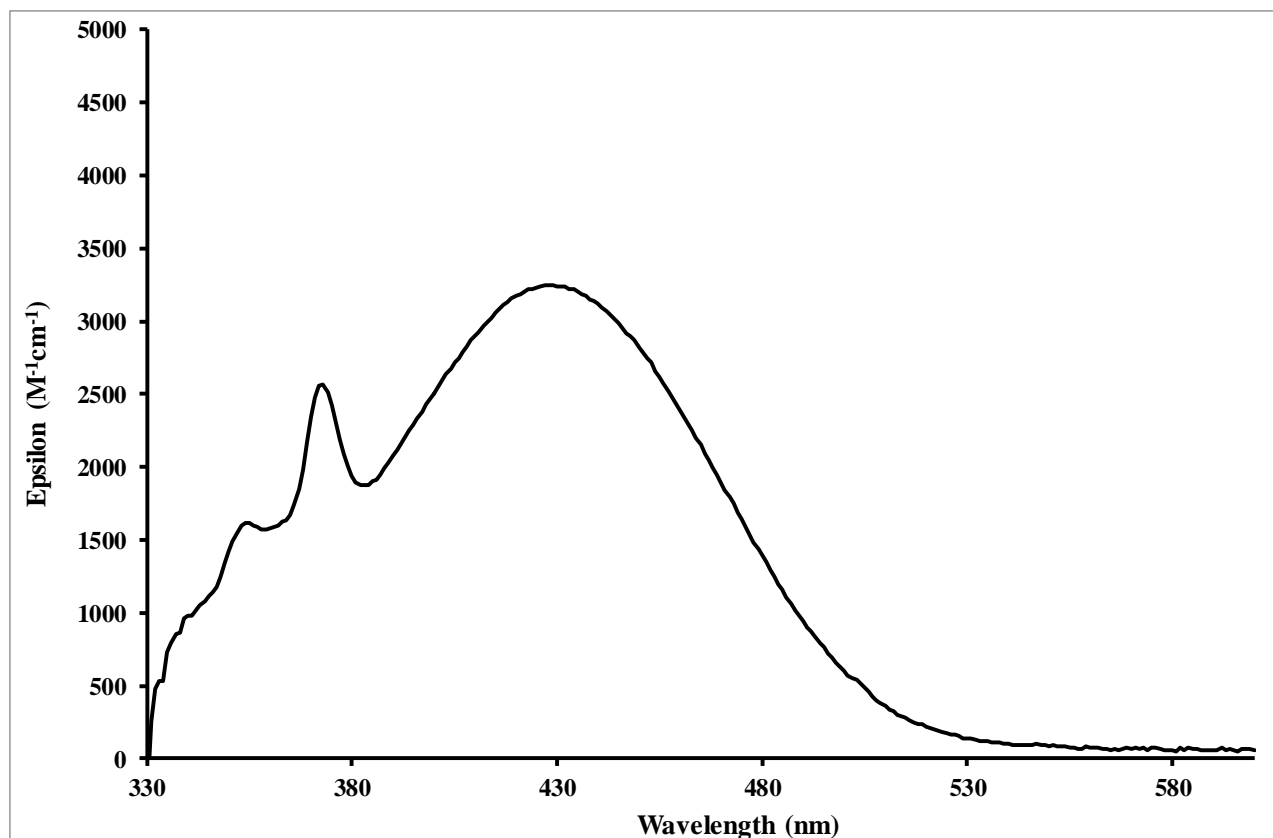

**Figure S18.** UV-Vis absorbance spectrum of ICAA recorded in acetone

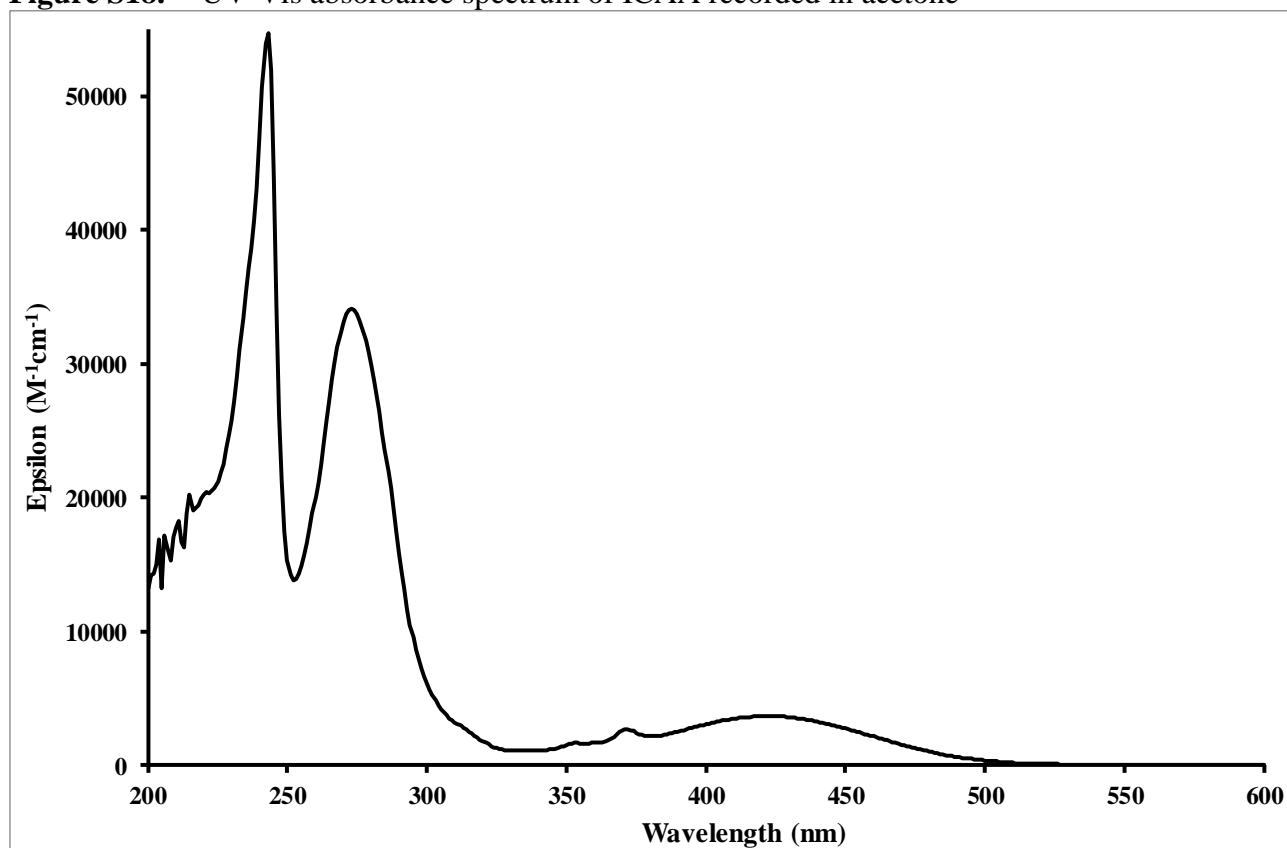

**Figure S19.** UV-Vis absorbance spectrum of ICAA recorded in acetonitrile

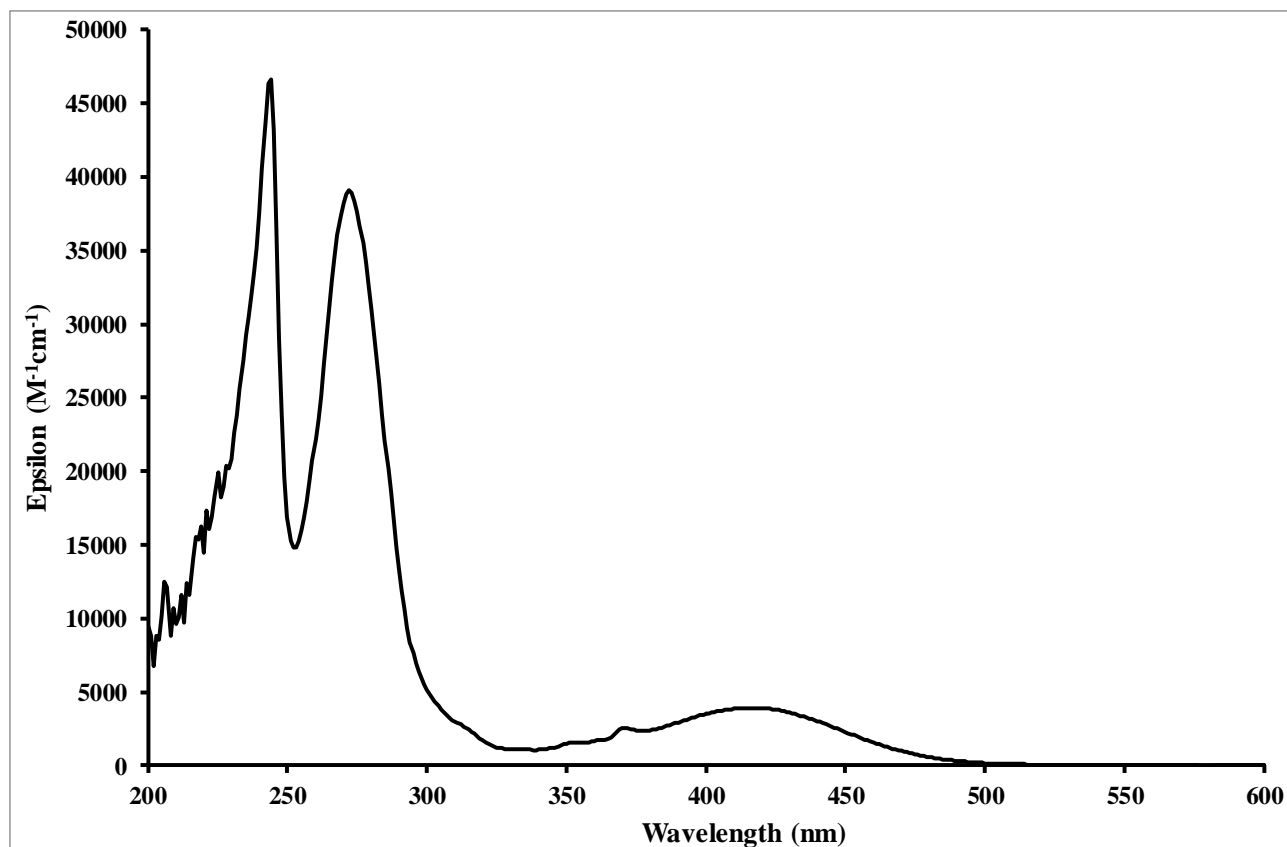

**Figure S20.** UV-Vis absorbance spectrum of ICAA recorded in dichloromethane

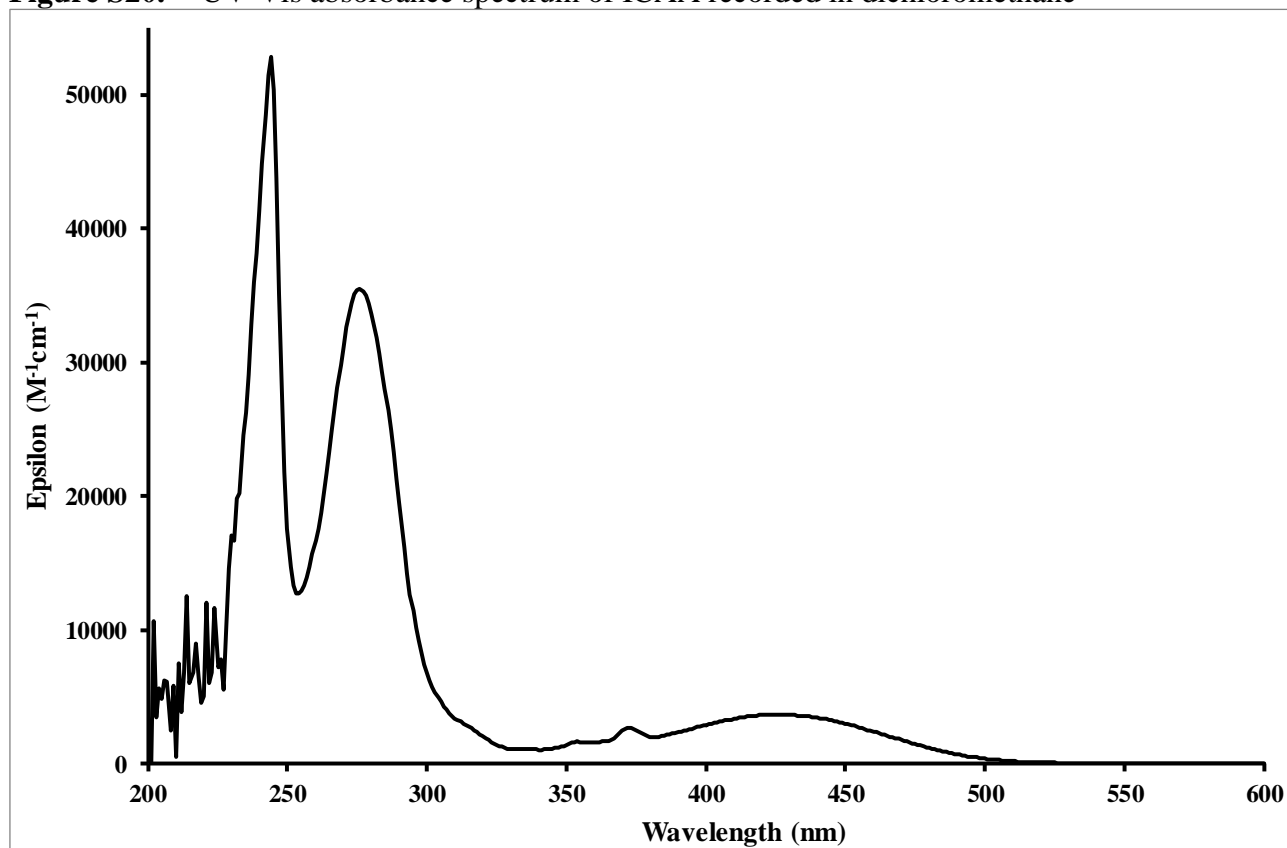

**Figure S21.** UV-Vis absorbance spectrum of ICAA recorded in 1,4-dioxane

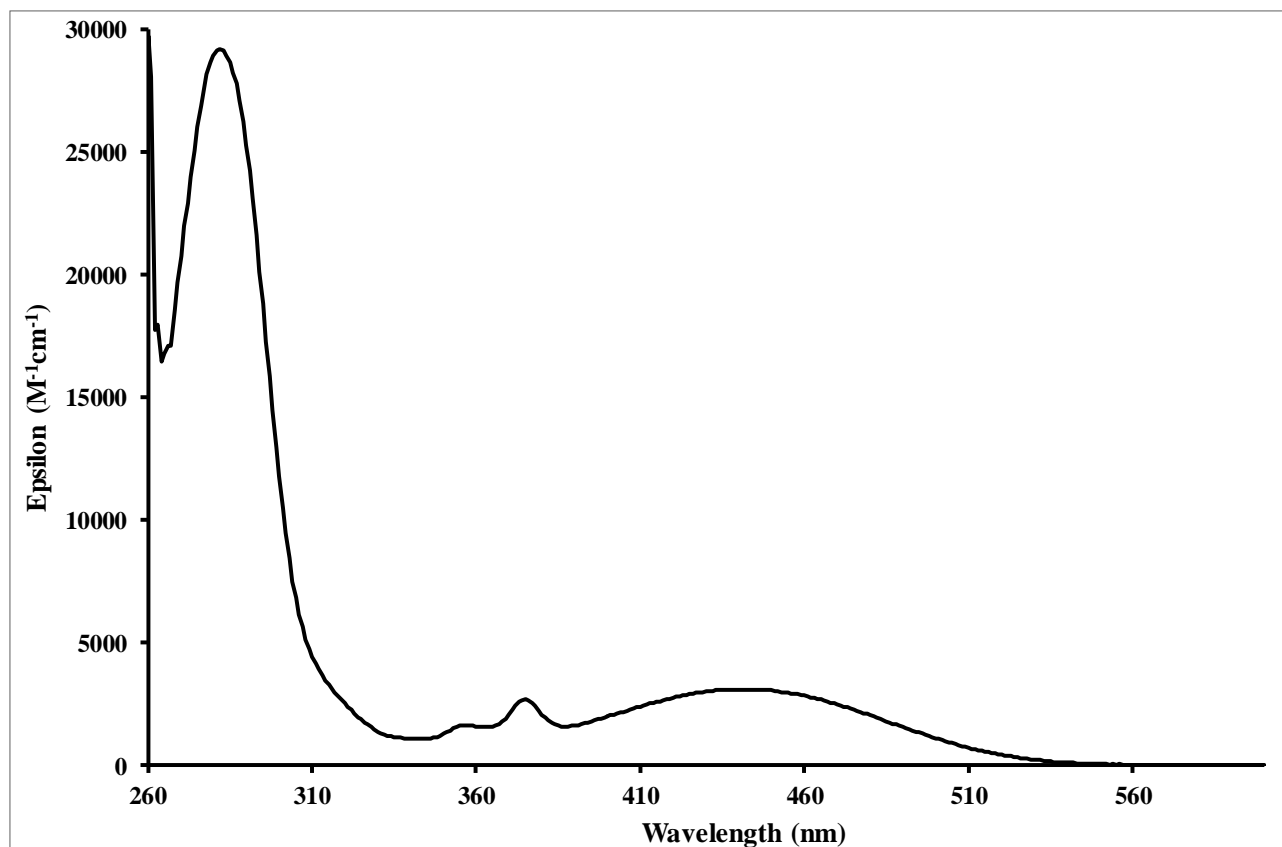

**Figure S22.** UV-Vis absorbance spectrum of ICAA recorded in DMF

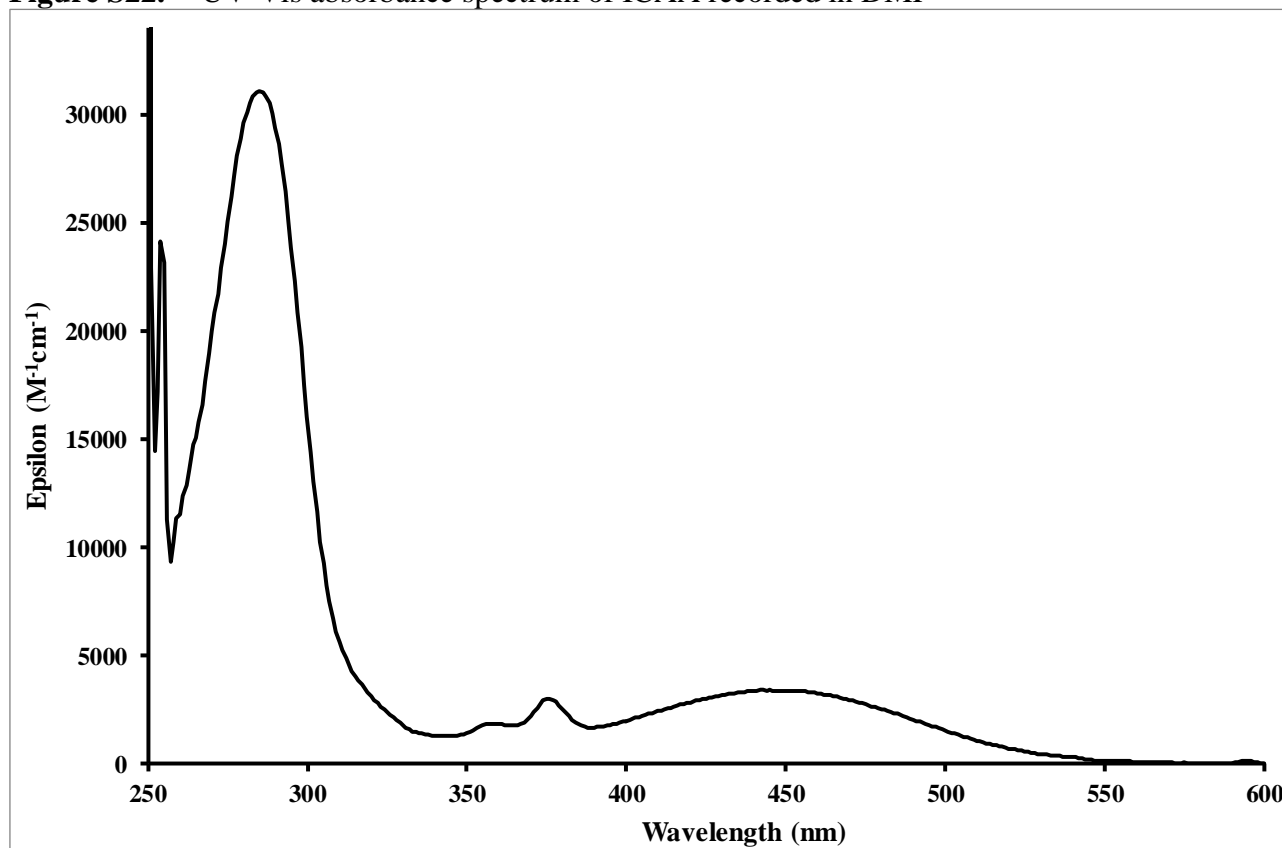

**Figure S23.** UV-Vis absorbance spectrum of ICAA recorded in DMSO



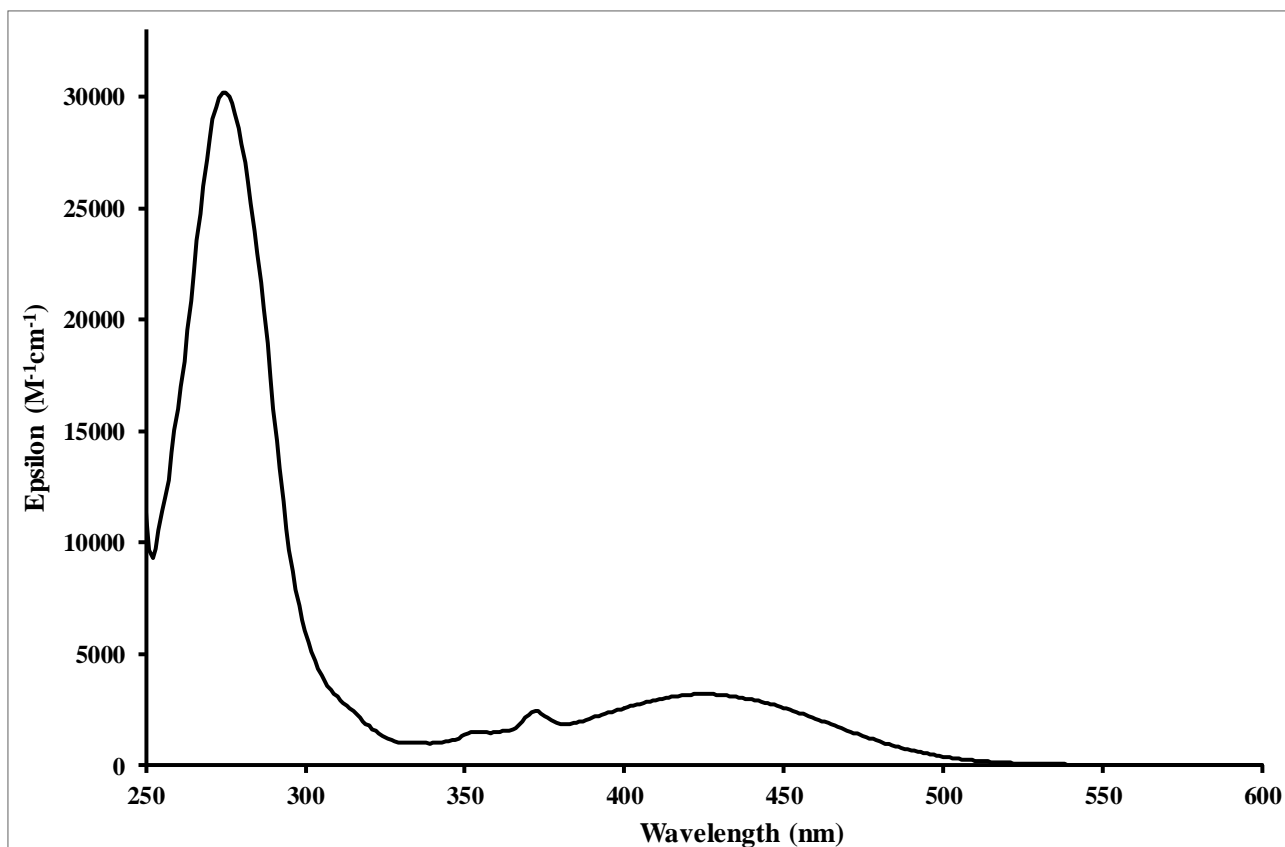

**Figure S24.** UV-Vis absorbance spectrum of ICAA recorded in ethyl acetate

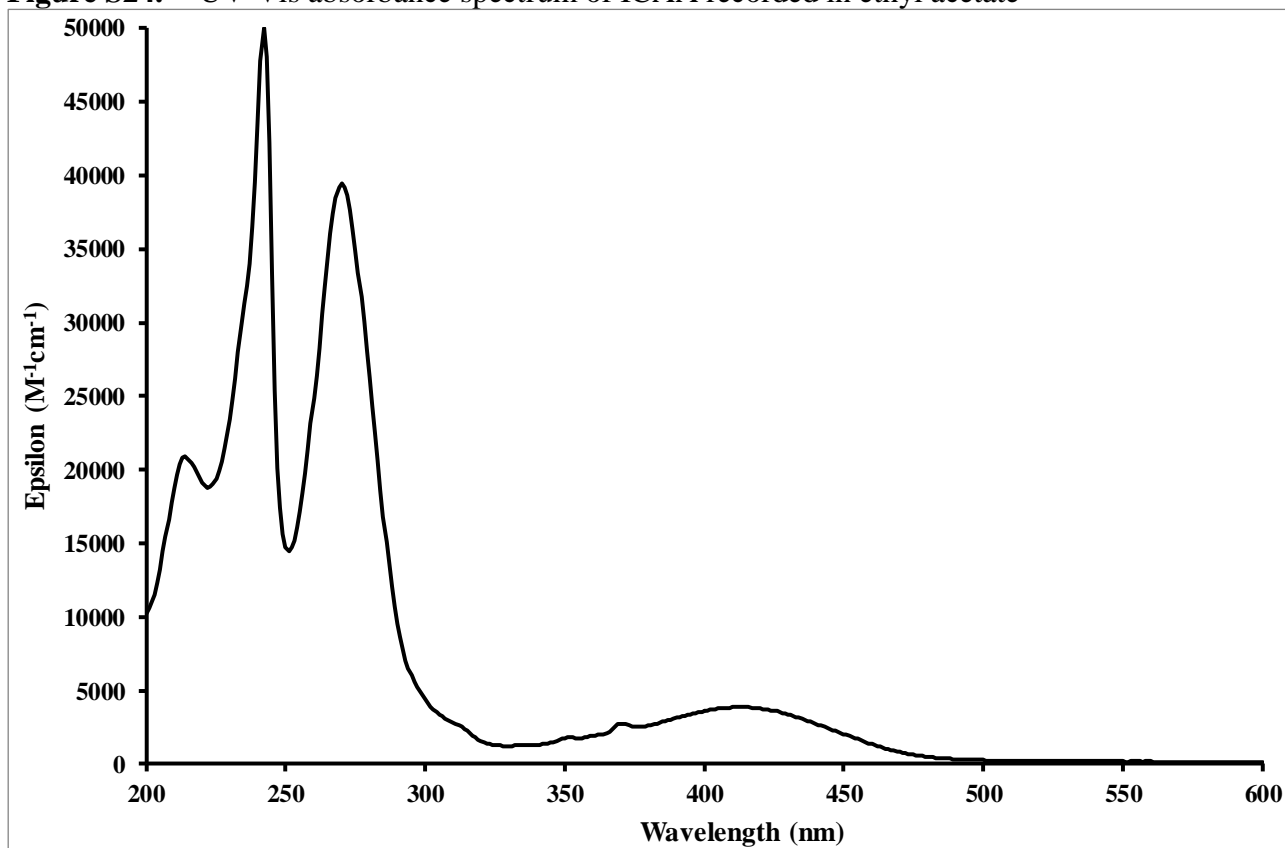

**Figure S25.** UV-Vis absorbance spectrum of ICAA recorded in hexane

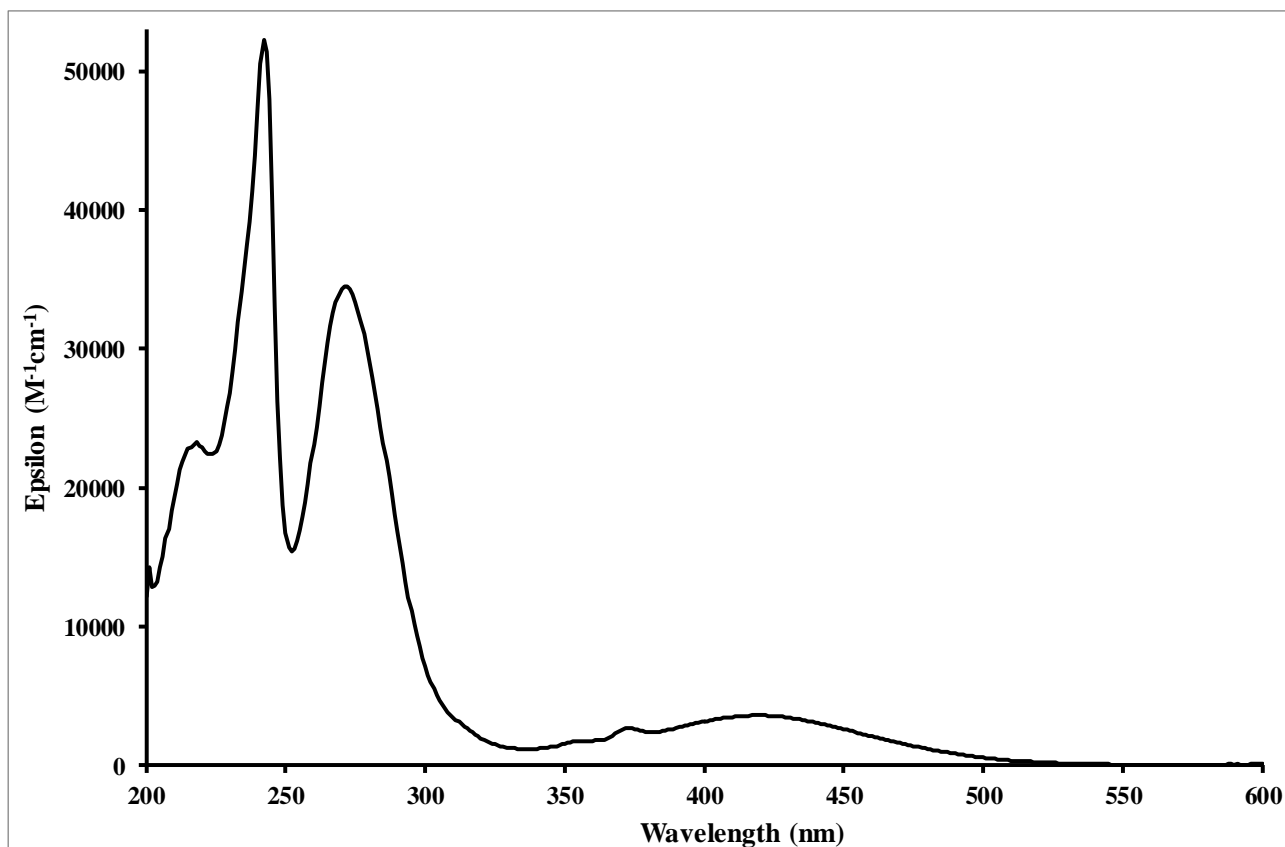

**Figure S26.** UV-Vis absorbance spectrum of ICAA recorded in 2-propanol

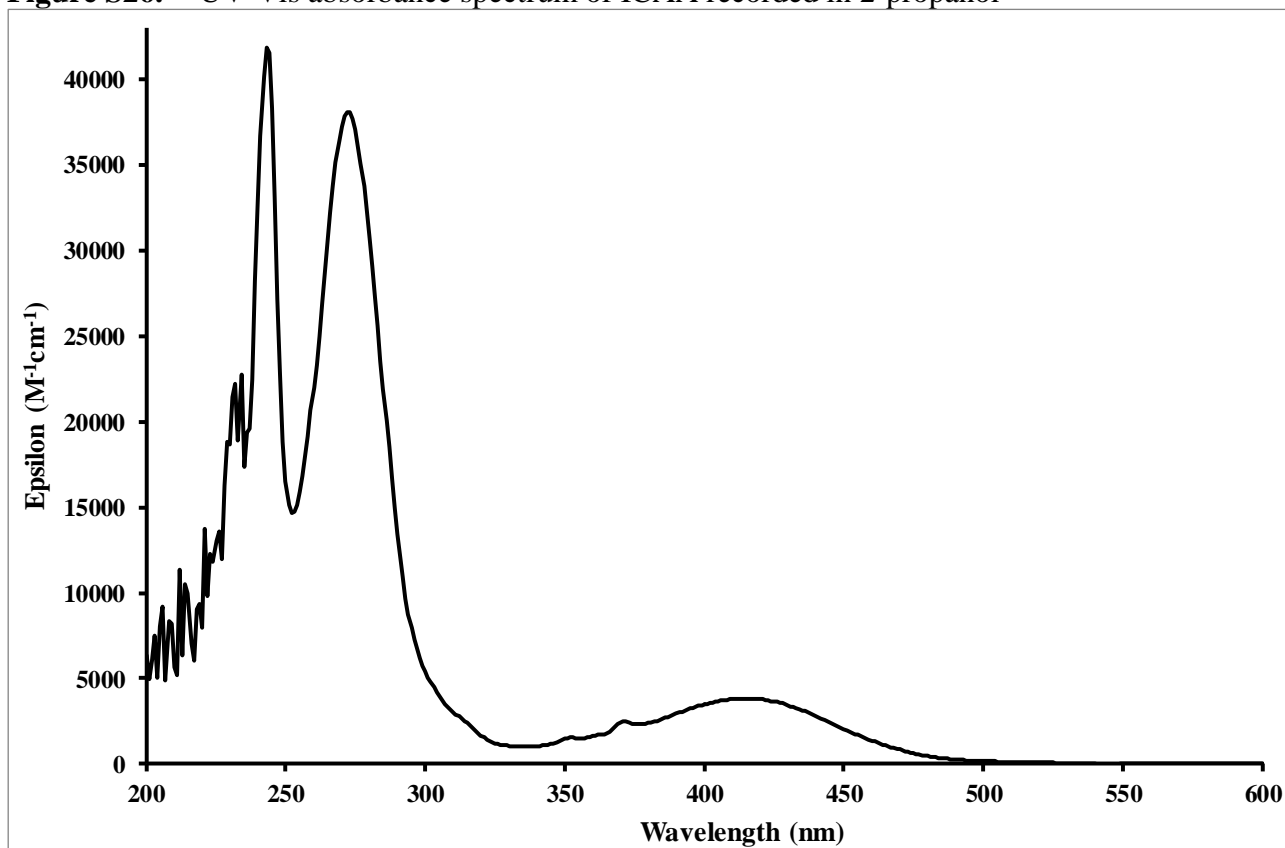

**Figure S27.** UV-Vis absorbance spectrum of ICAA recorded in chloroform

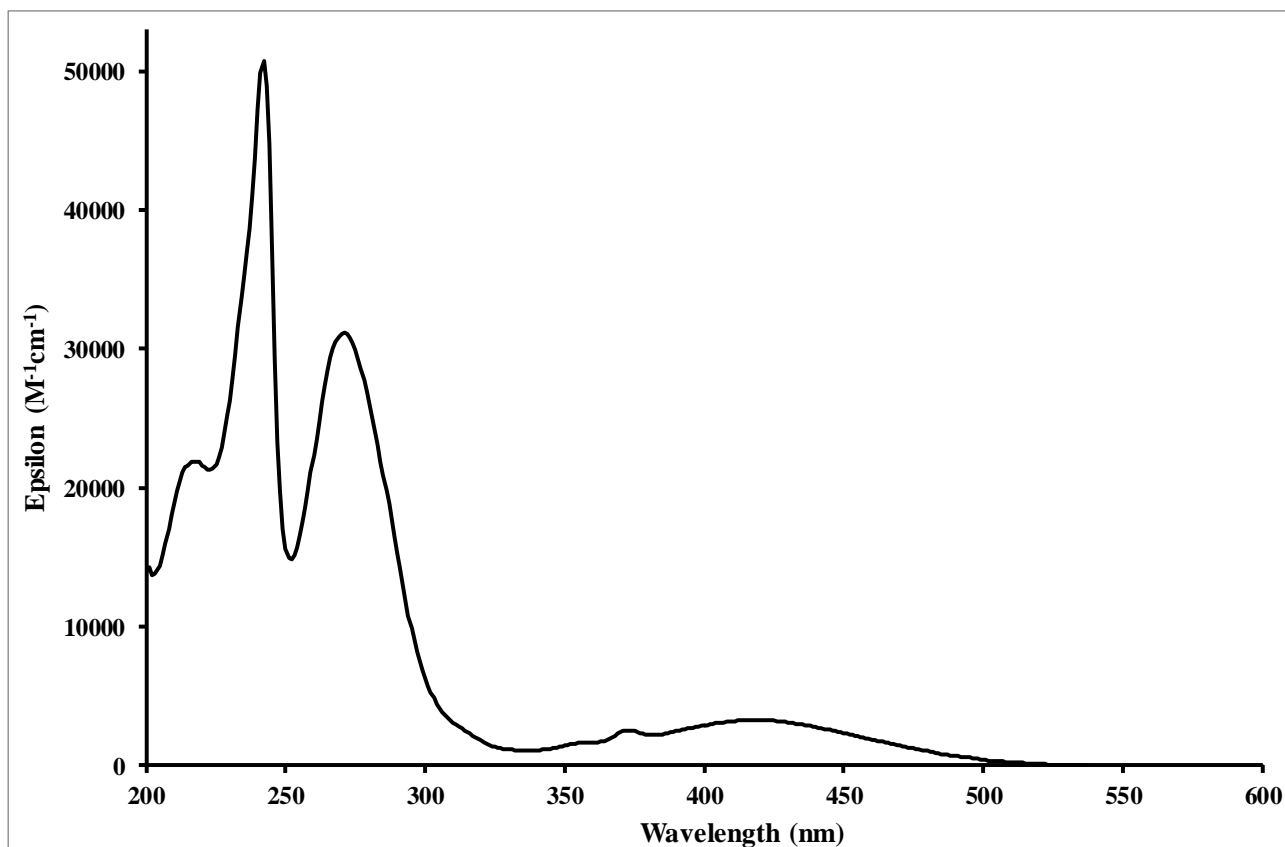

**Figure S28.** UV-Vis absorbance spectrum of ICAA recorded in methanol

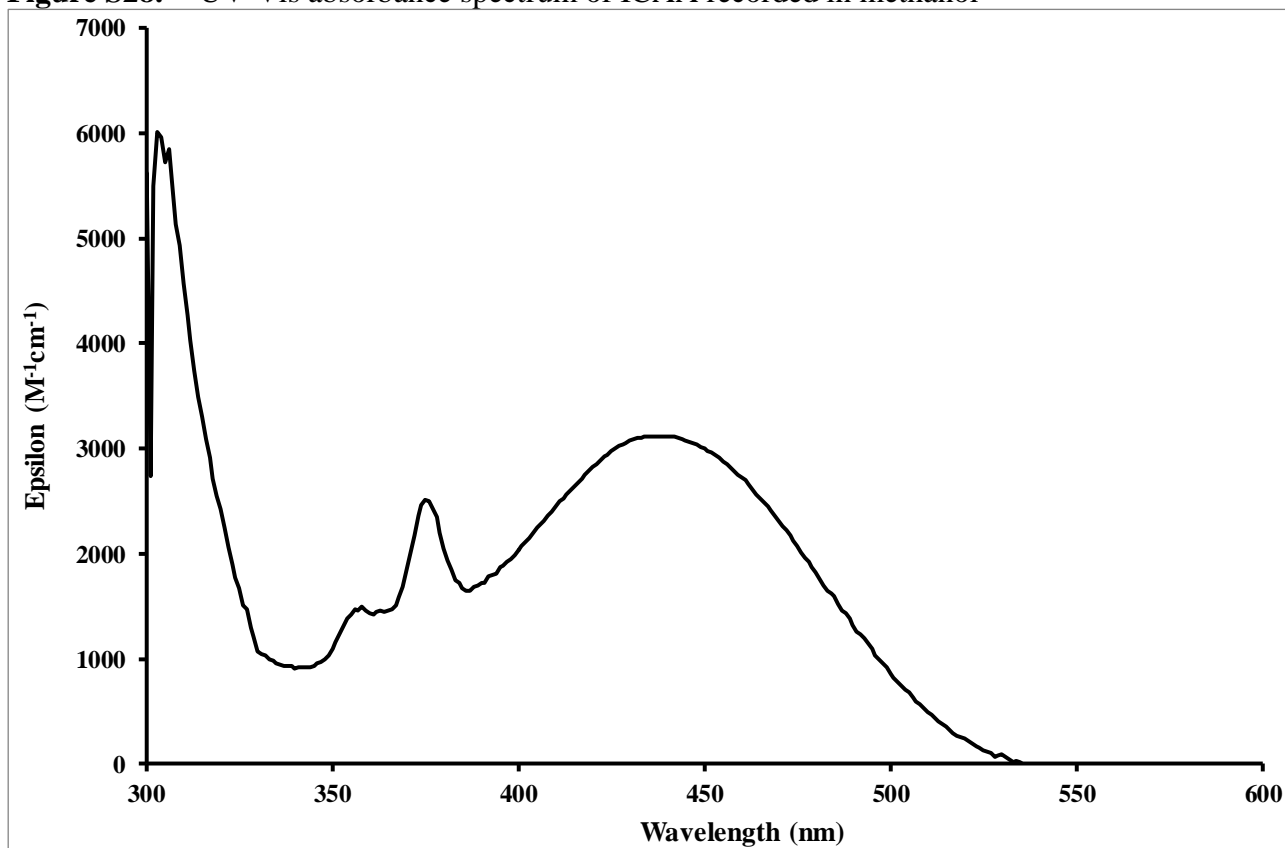

**Figure S29.** UV-Vis absorbance spectrum of ICAA recorded in pyridine

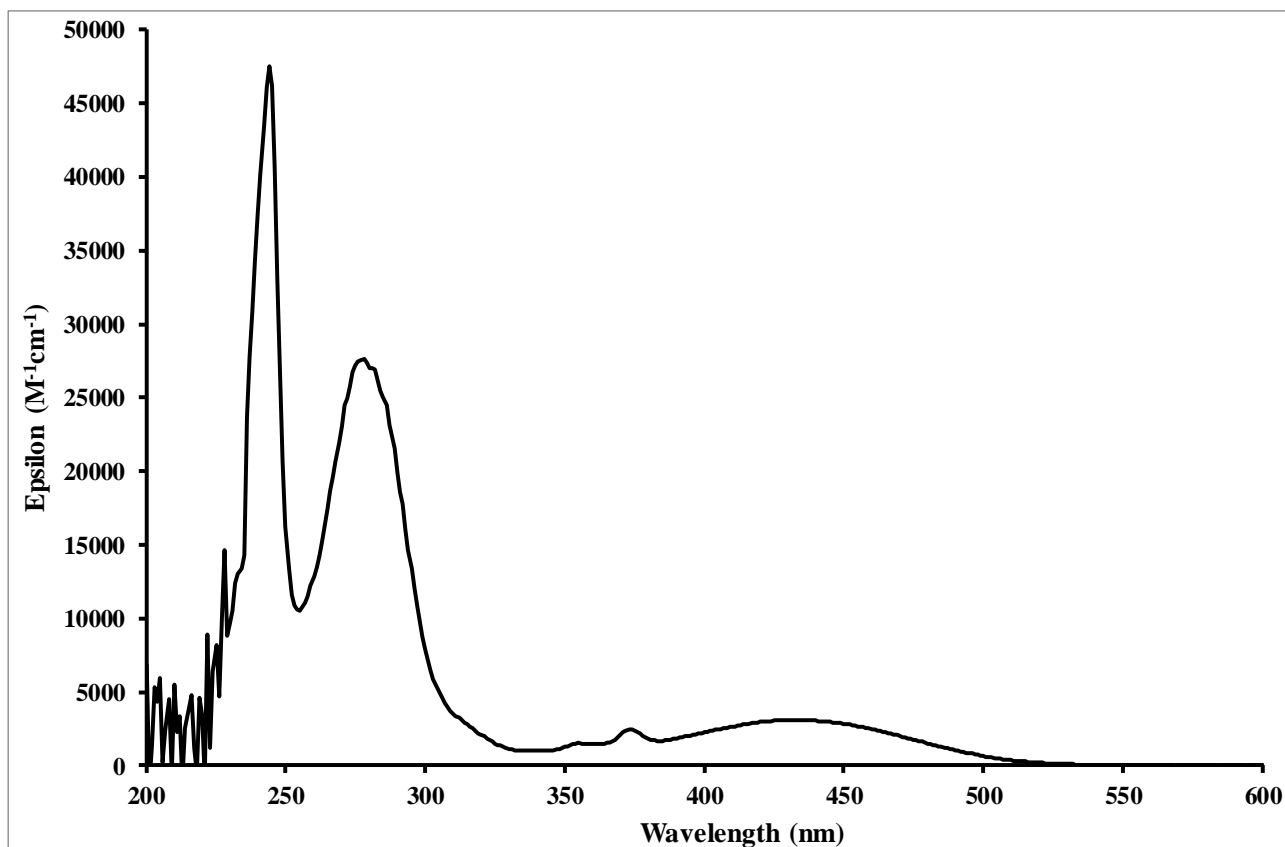

**Figure S30.** UV-Vis absorbance spectrum of ICAA recorded in THF

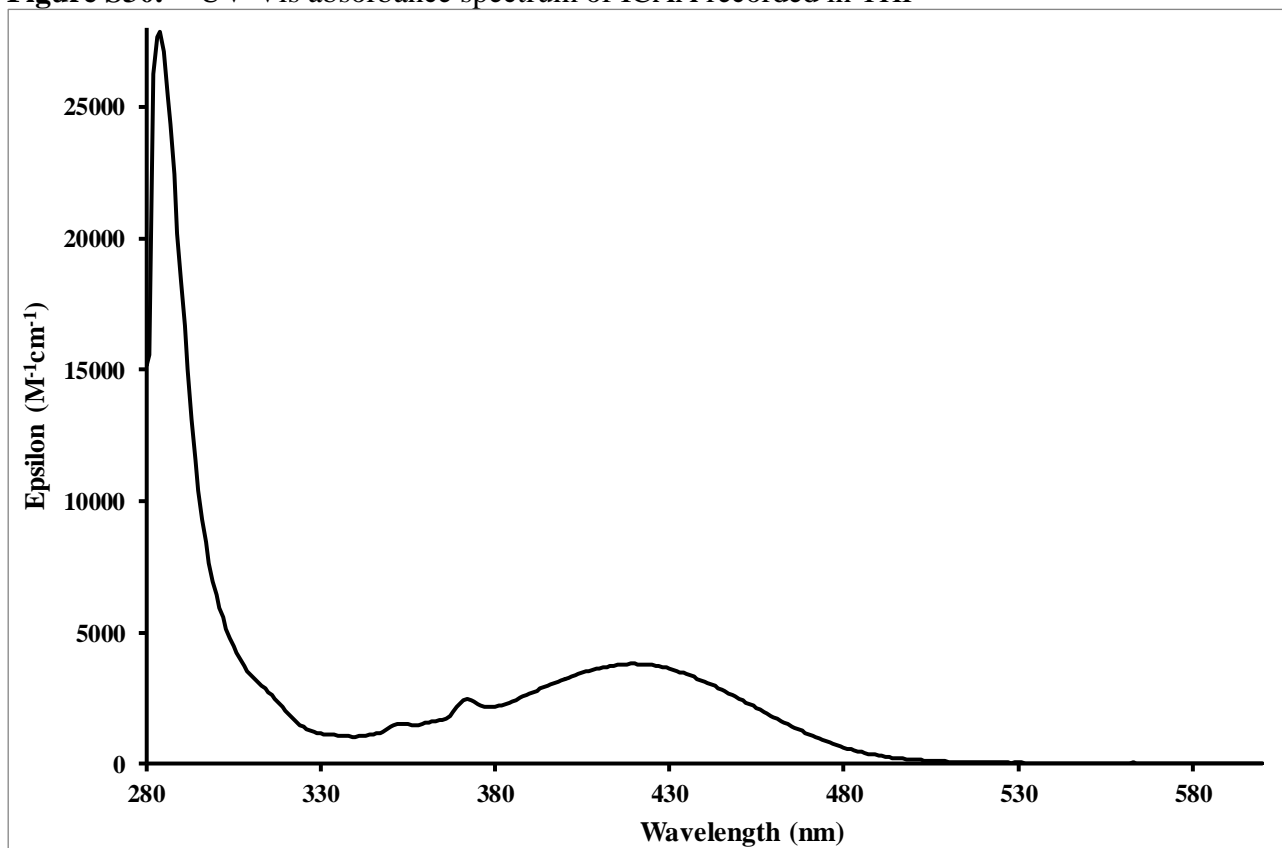

**Figure S31.** UV-Vis absorbance spectrum of ICAA recorded in toluene

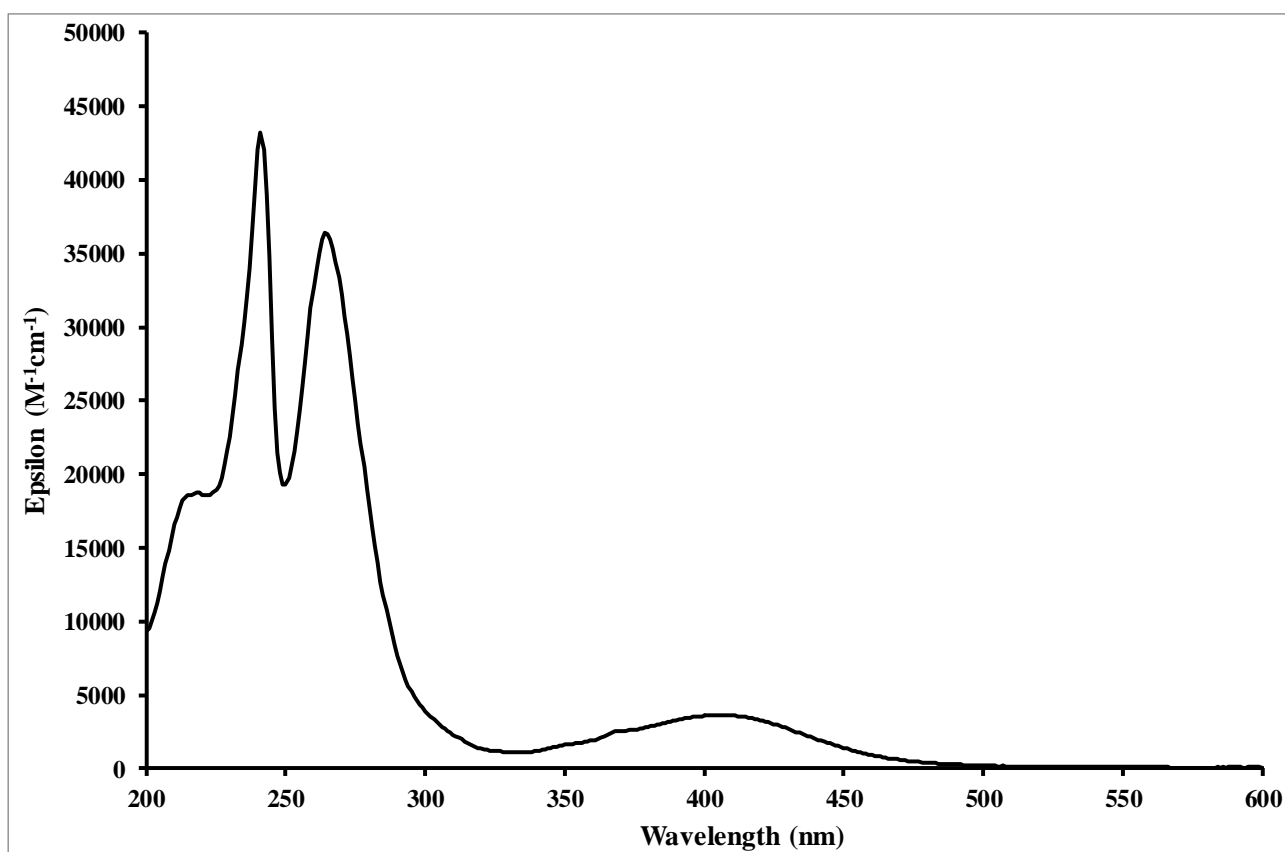

**Figure S32.** UV-Vis absorbance spectrum of ICAA recorded in water

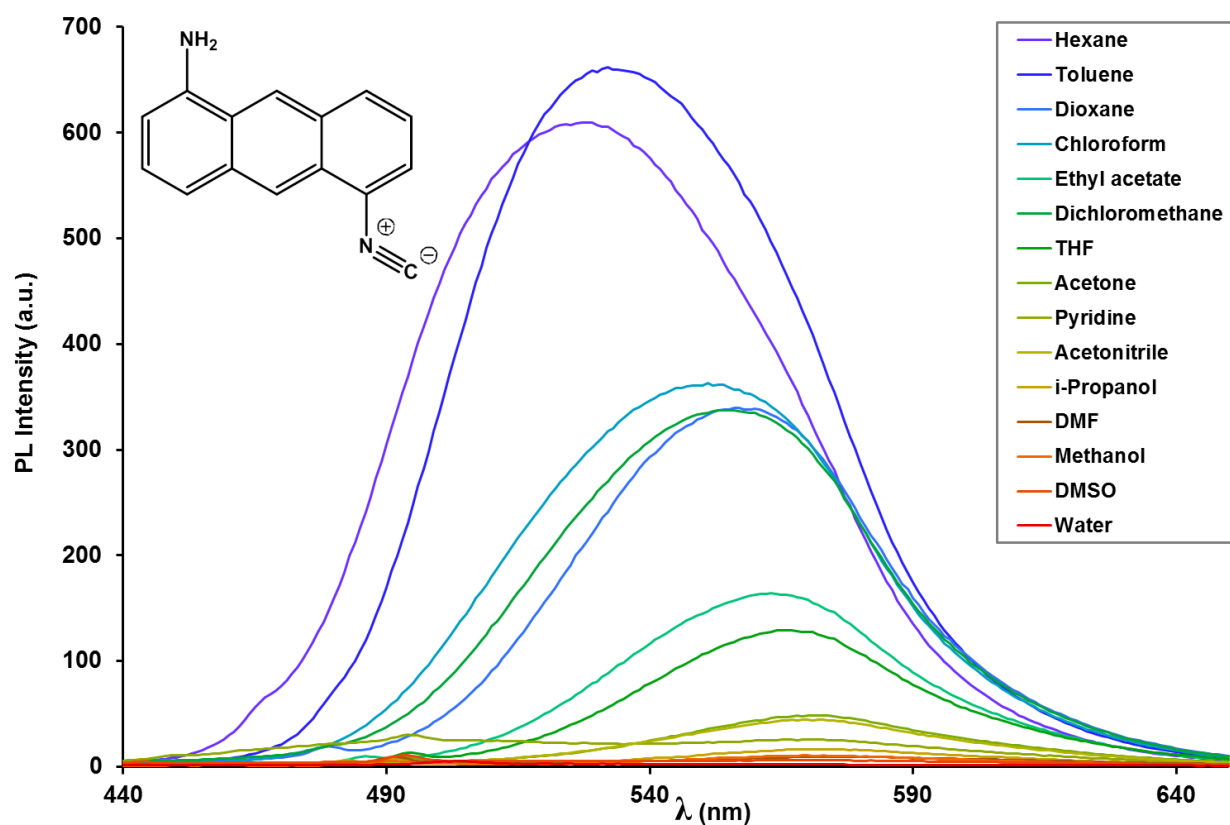

**Figure S33.** The emission spectra of 1-amino-5-isocyanoanthracene (ICAA) recorded in solvents of different polarity. ( $c=5\times10^{-5}$  M,  $T=20$  °C,  $V=3.00$  ml).

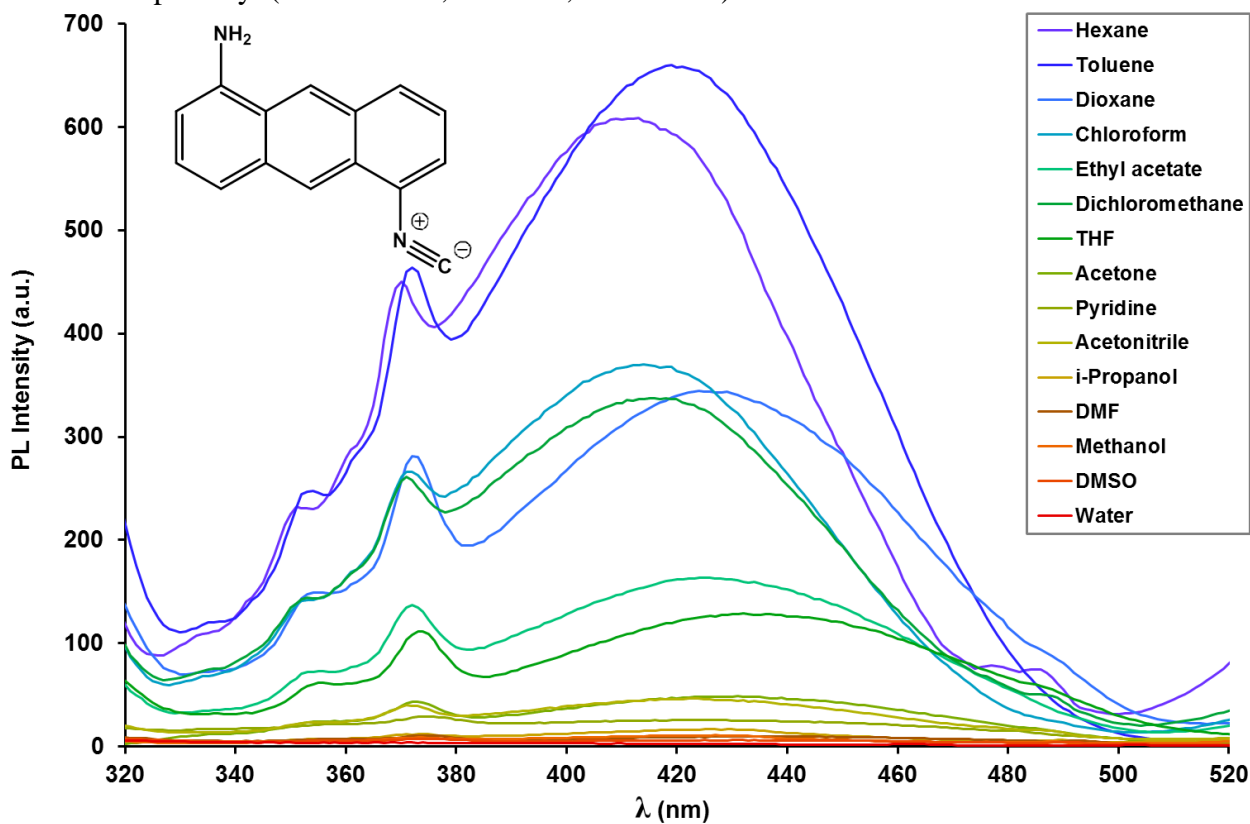

**Figure S34.** The excitation spectra of 1-amino-5-isocyanoanthracene (ICAA) recorded in solvents of different polarity. ( $c=5\times10^{-5}$  M,  $T=20$  °C,  $V=3.00$  ml).

### Chapter 3. 1,5-diisocyanoanthracene (DIA)

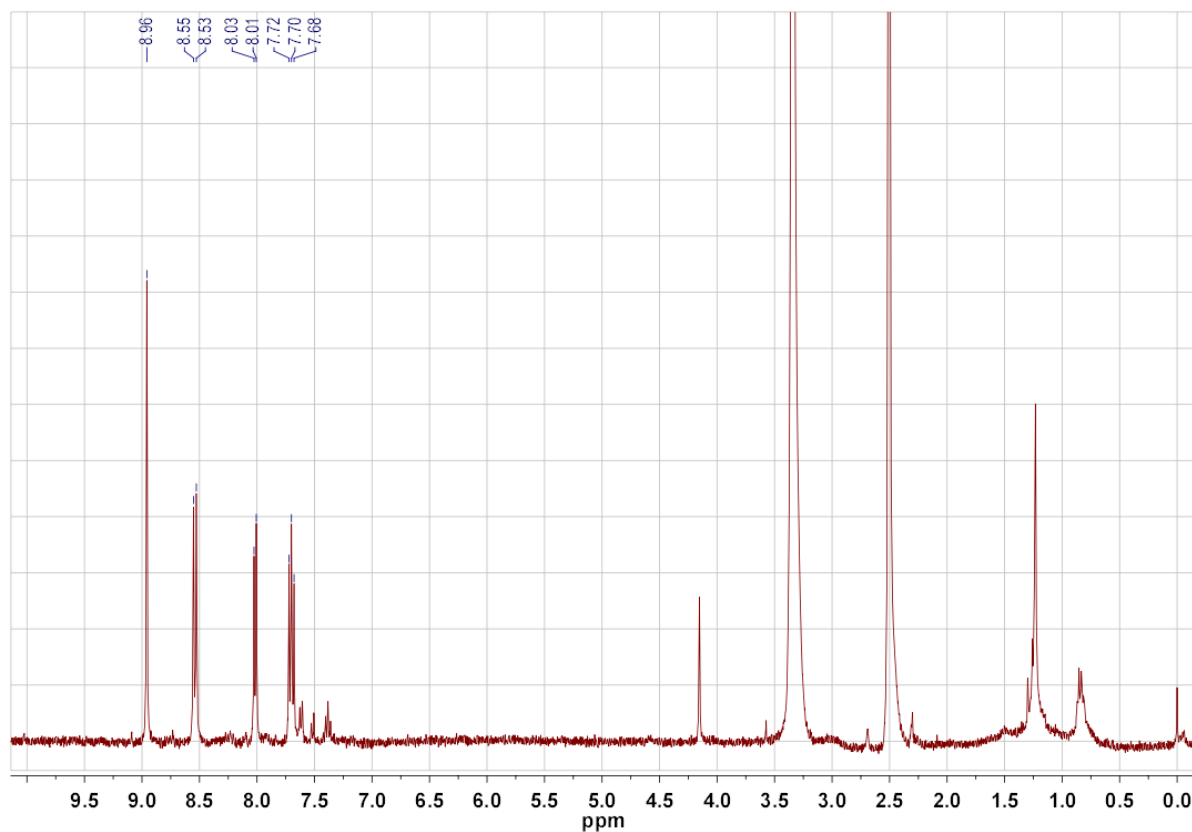

**Figure S35.** <sup>1</sup>H-NMR spectrum of DIA recorded at 20 °C in DMSO-d<sub>6</sub>

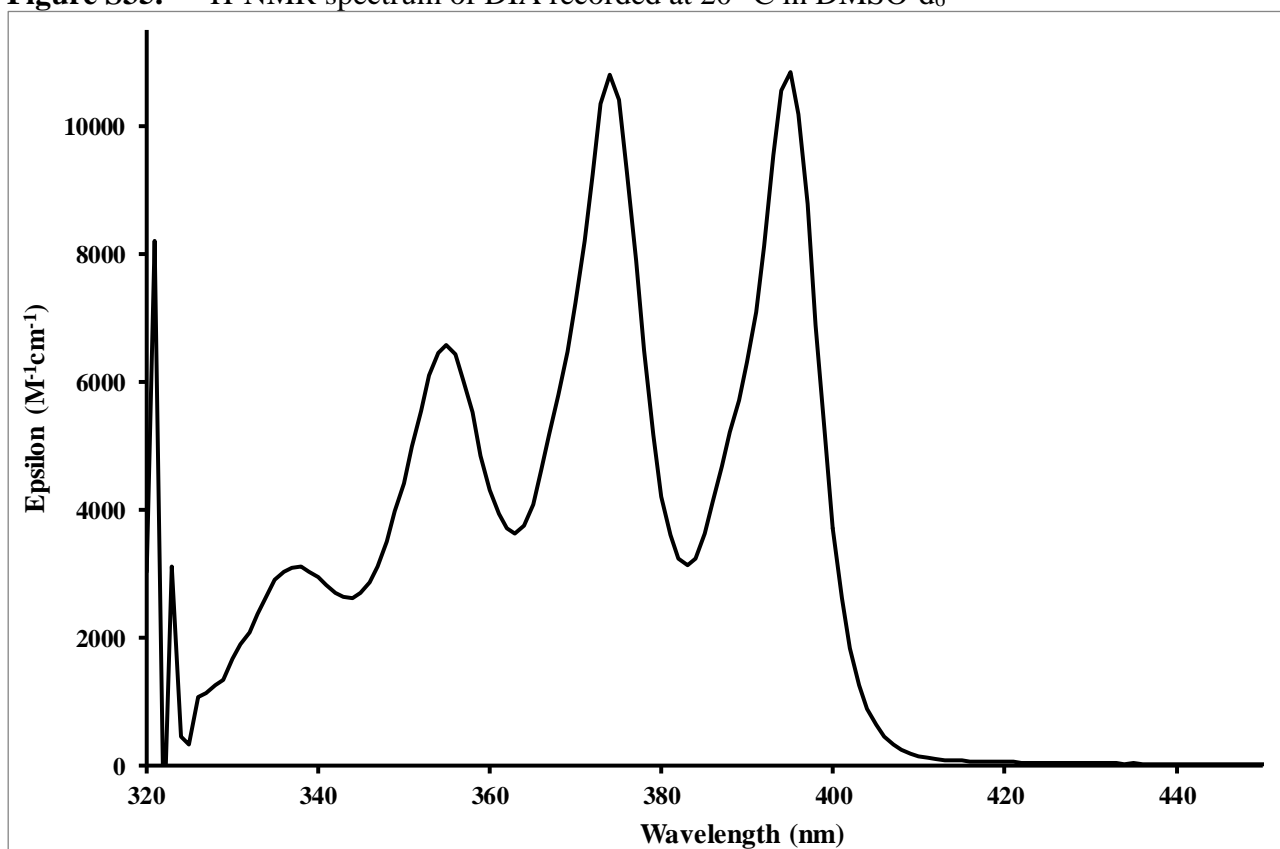

**Figure S36.** UV-Vis absorbance spectrum of DIA recorded in acetone

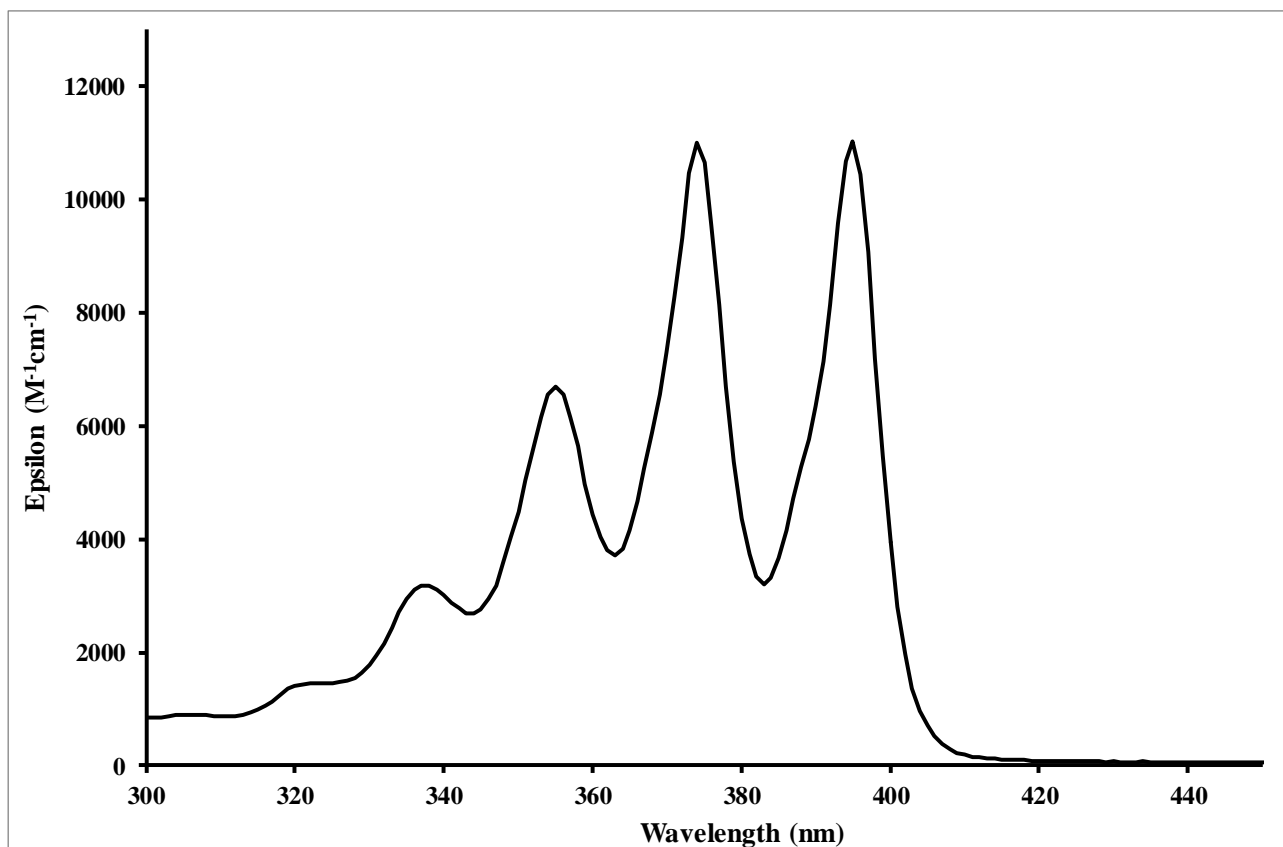

**Figure S37.** UV-Vis absorbance spectrum of DIA recorded in acetonitrile

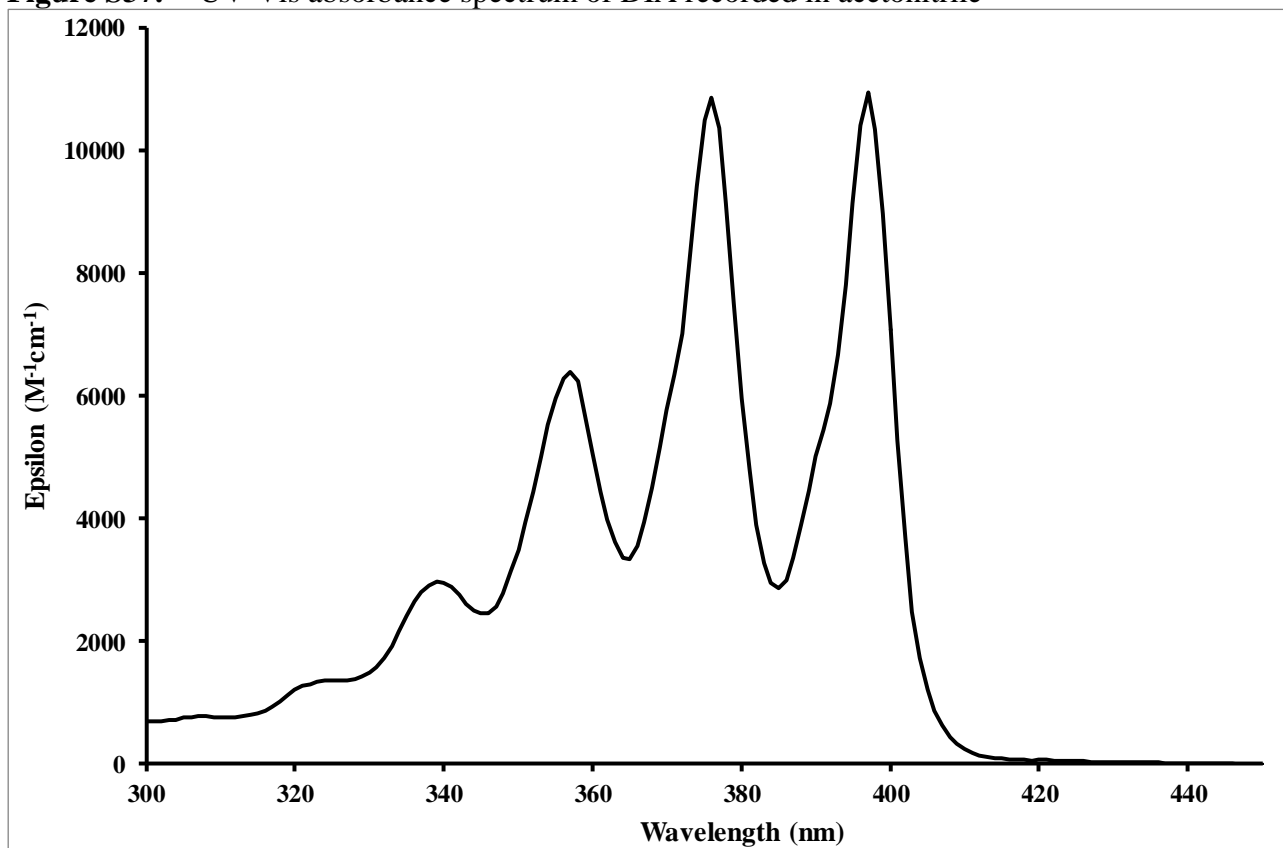

**Figure S38.** UV-Vis absorbance spectrum of DIA recorded in dichloromethane



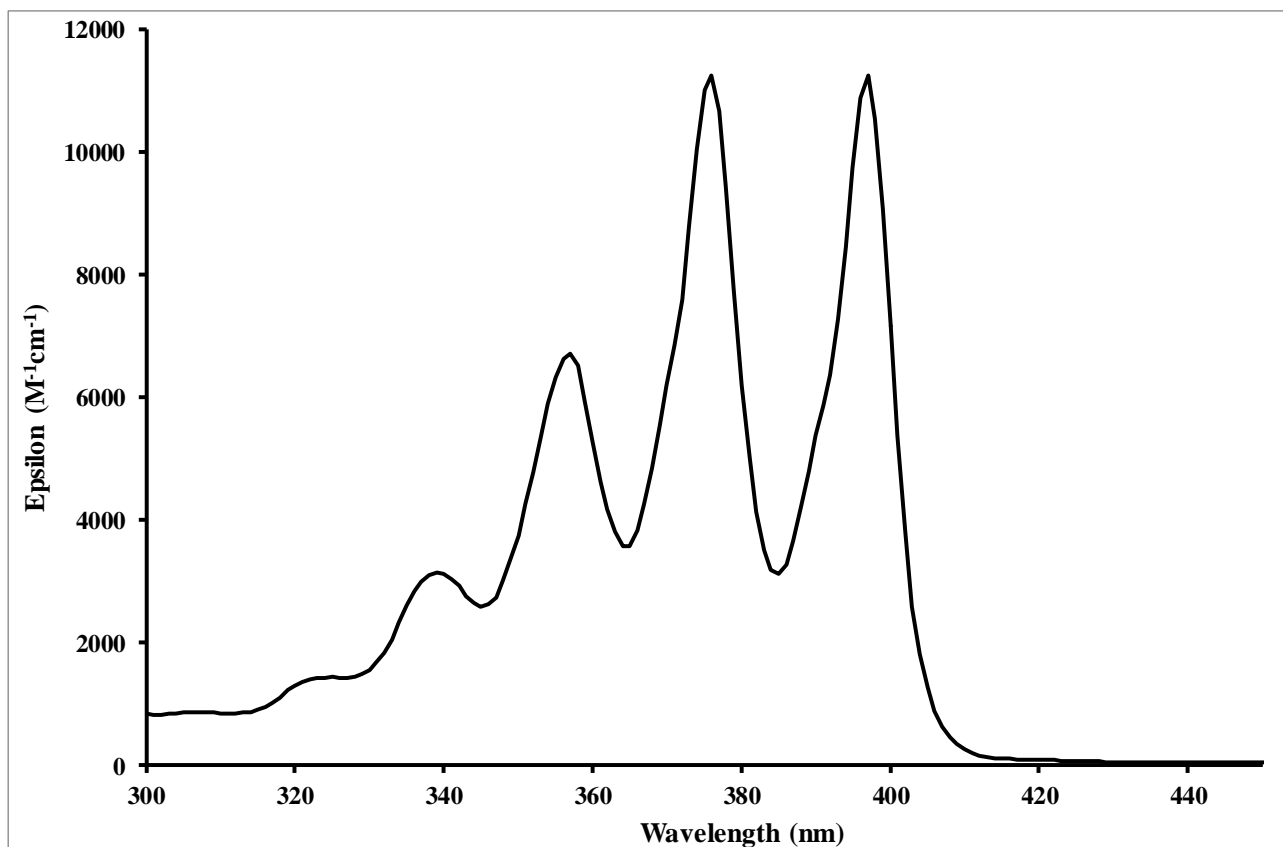

**Figure S39.** UV-Vis absorbance spectrum of DIA recorded in 1,4-dioxane

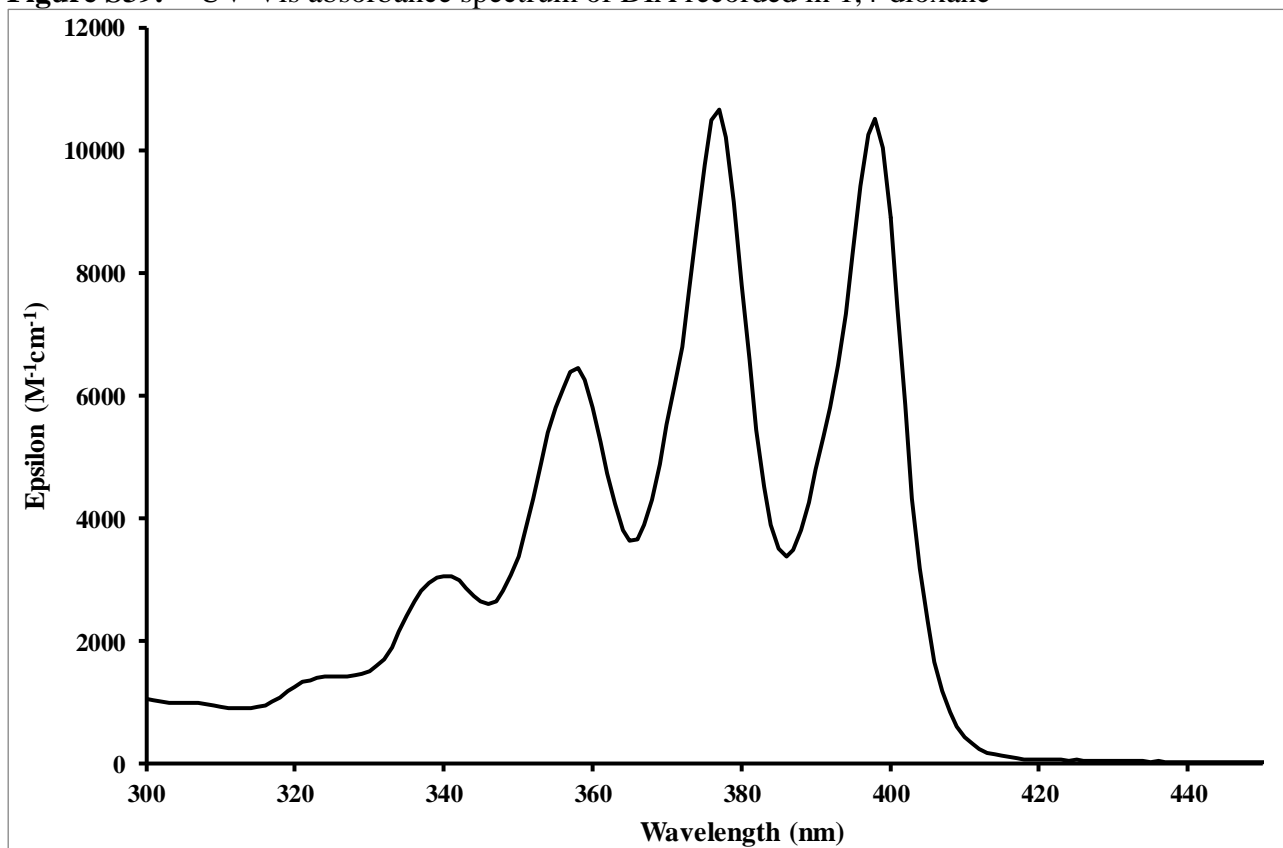

**Figure S40.** UV-Vis absorbance spectrum of DIA recorded in DMF

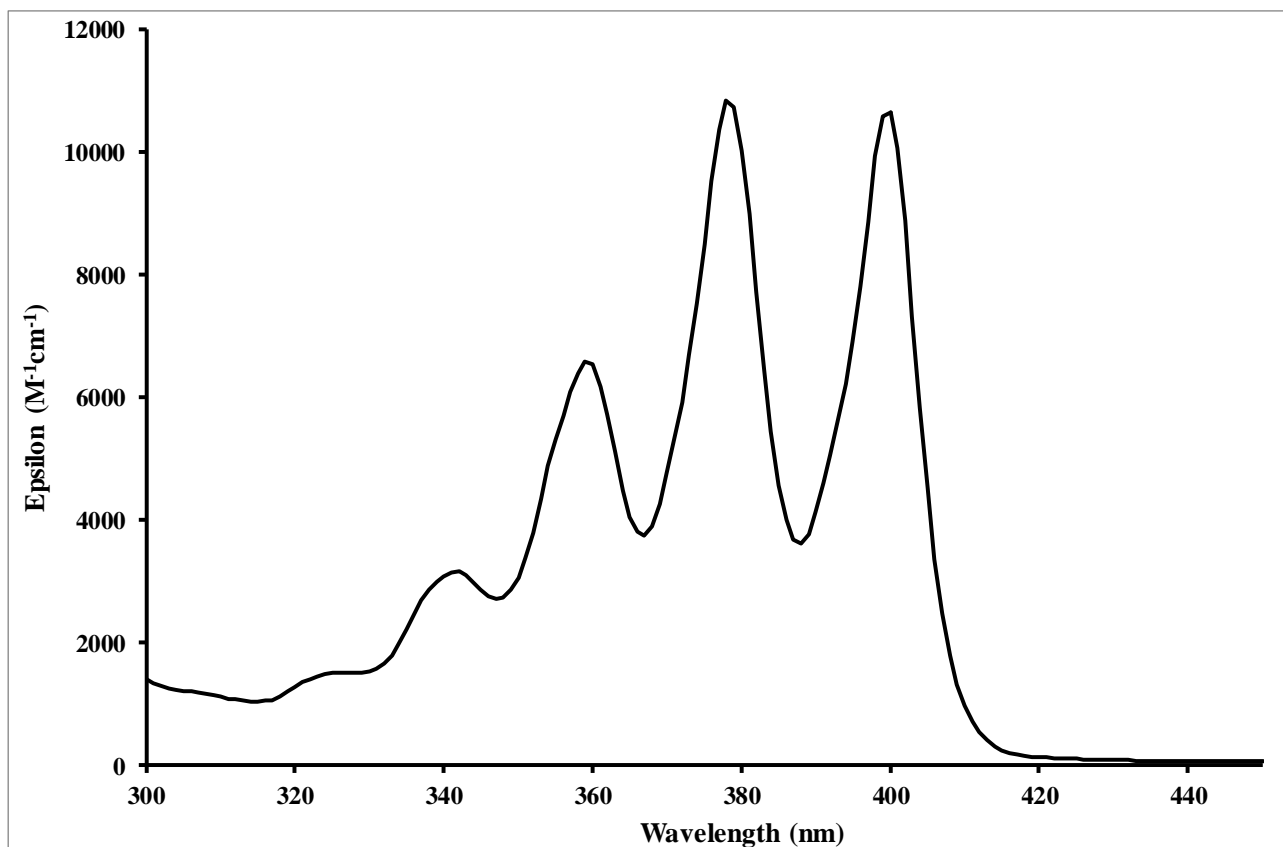

**Figure S41.** UV-Vis absorbance spectrum of DIA recorded in DMSO

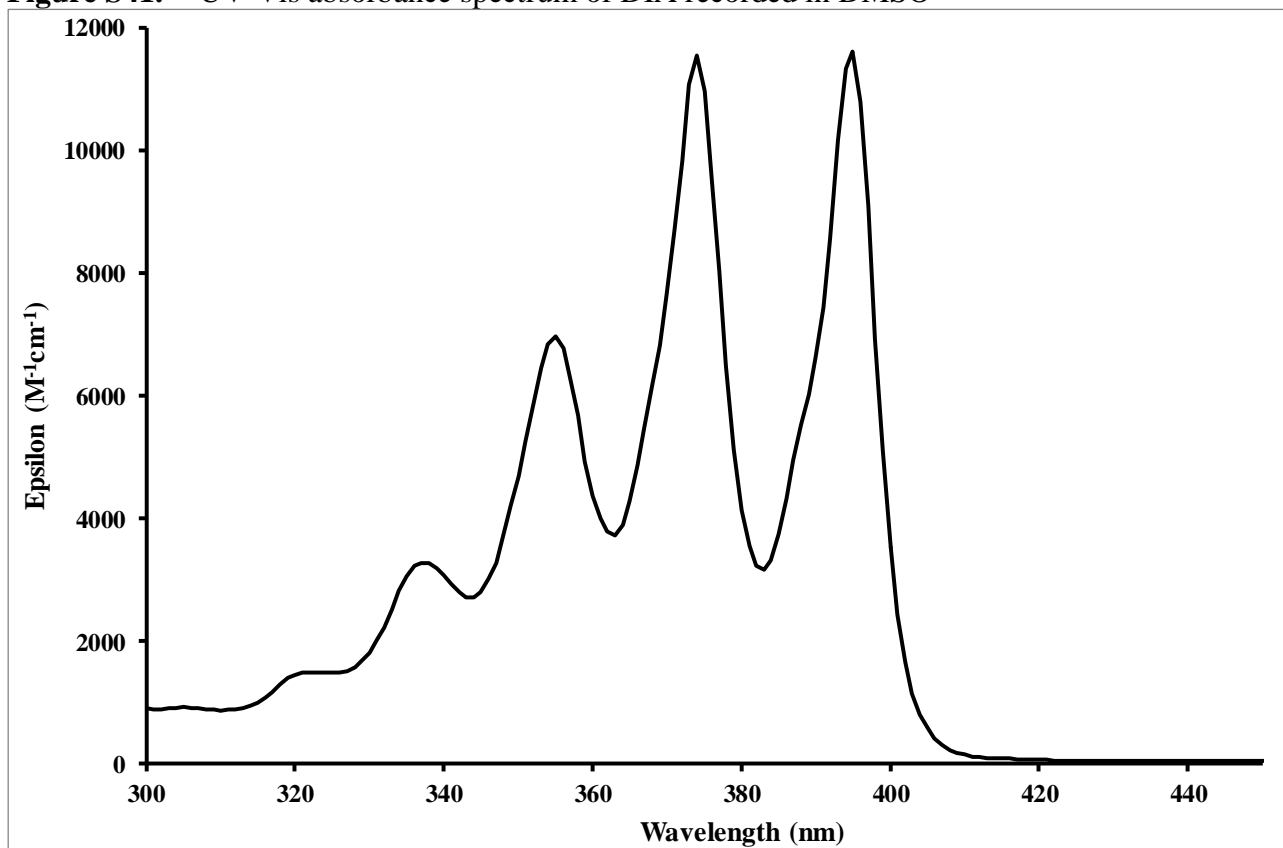

**Figure S42.** UV-Vis absorbance spectrum of DIA recorded in ethyl acetate

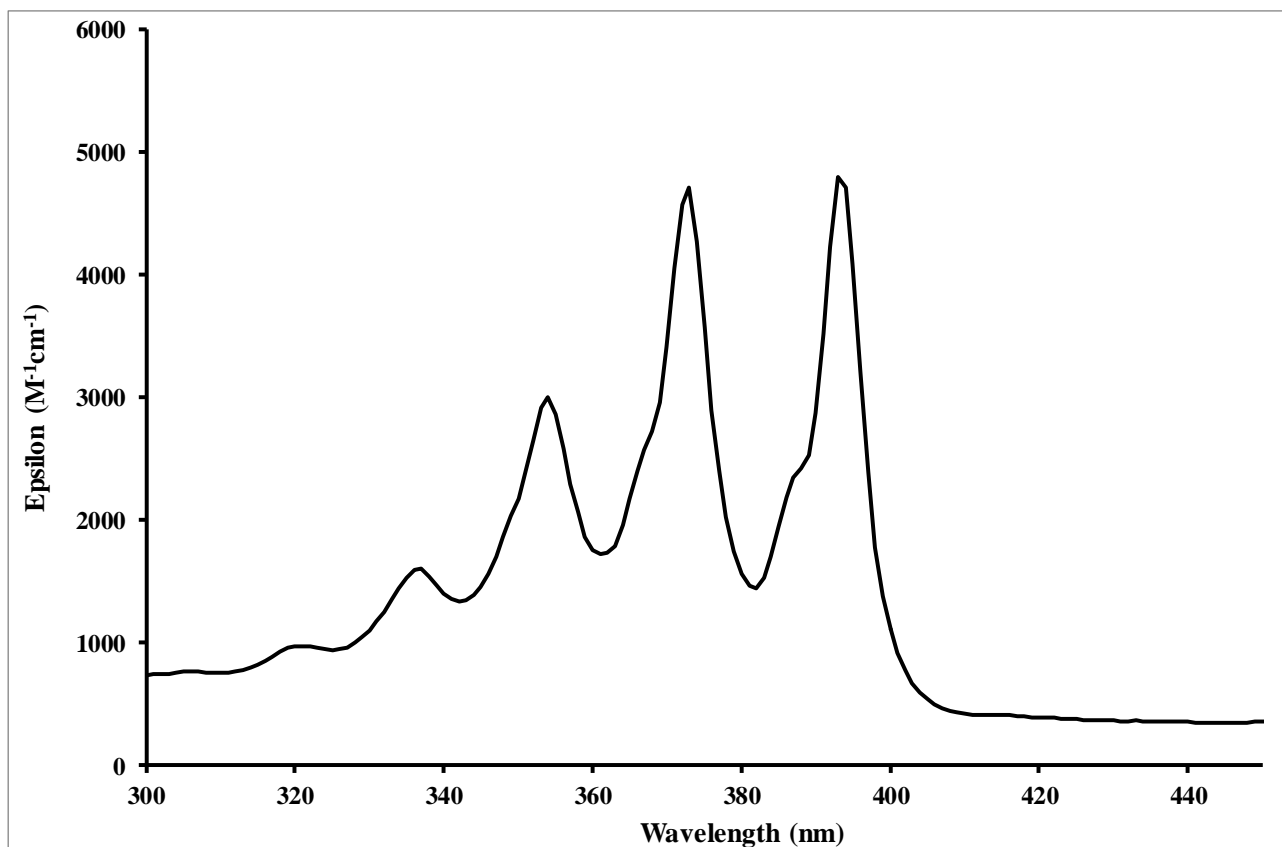

**Figure S43.** UV-Vis absorbance spectrum of DIA recorded in hexane

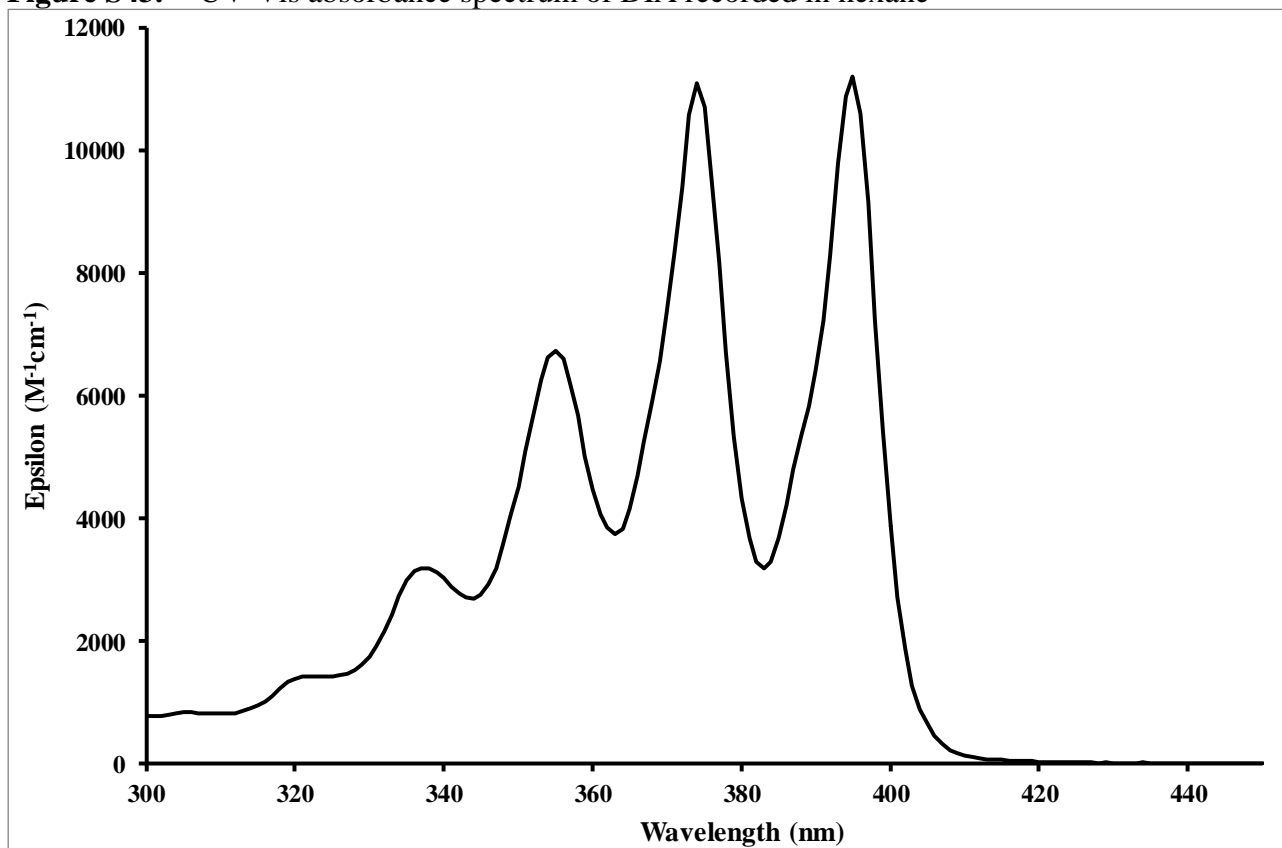

**Figure S44.** UV-Vis absorbance spectrum of DIA recorded in 2-propanol

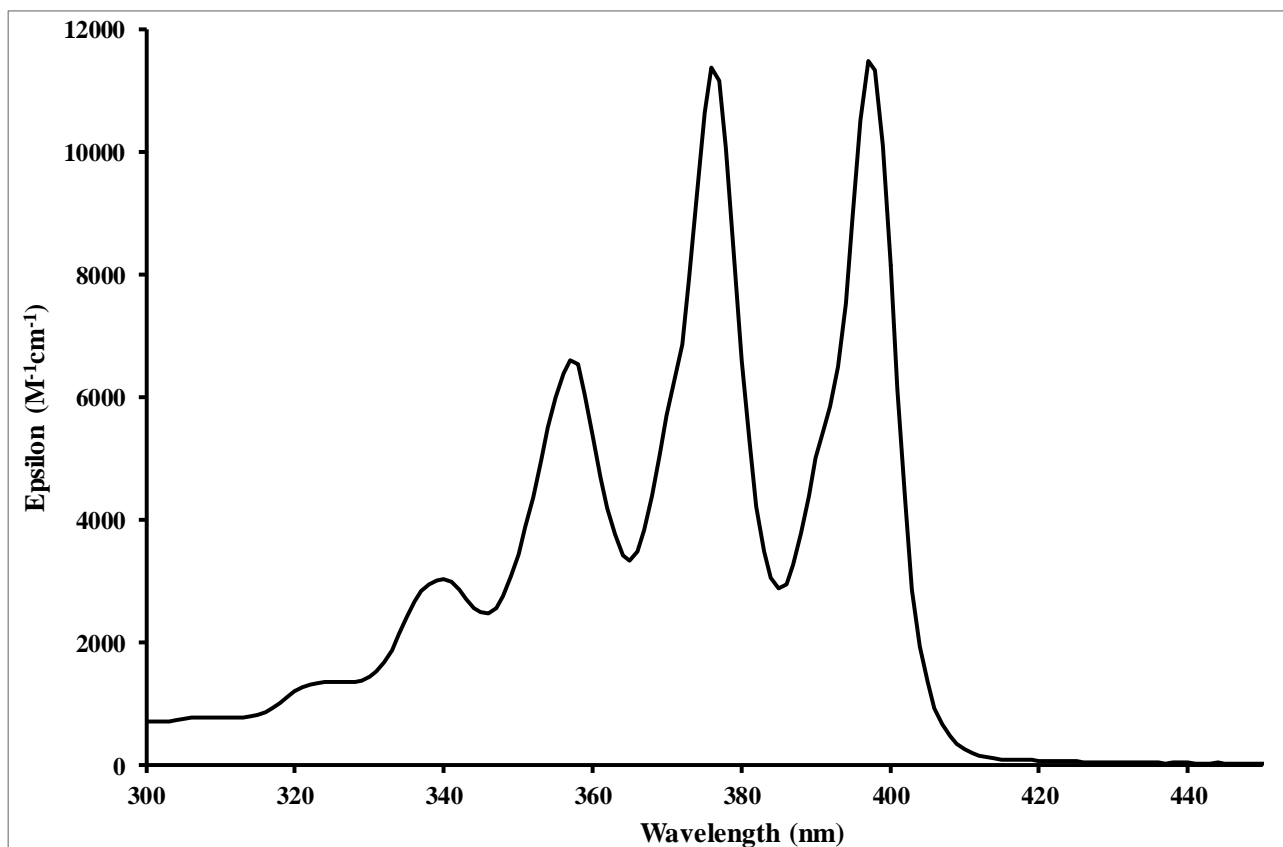

**Figure S45.** UV-Vis absorbance spectrum of DIA recorded in chloroform

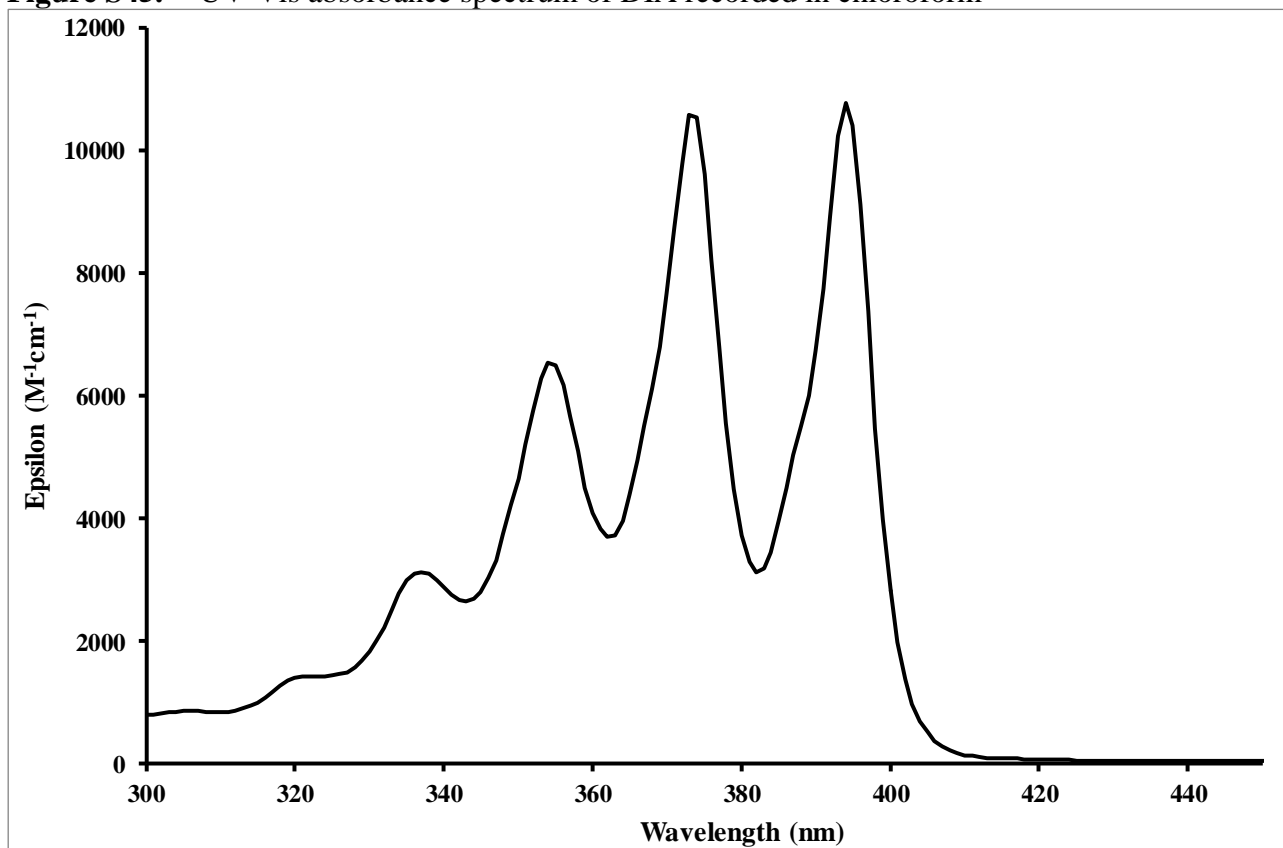

**Figure S46.** UV-Vis absorbance spectrum of DIA recorded in methanol

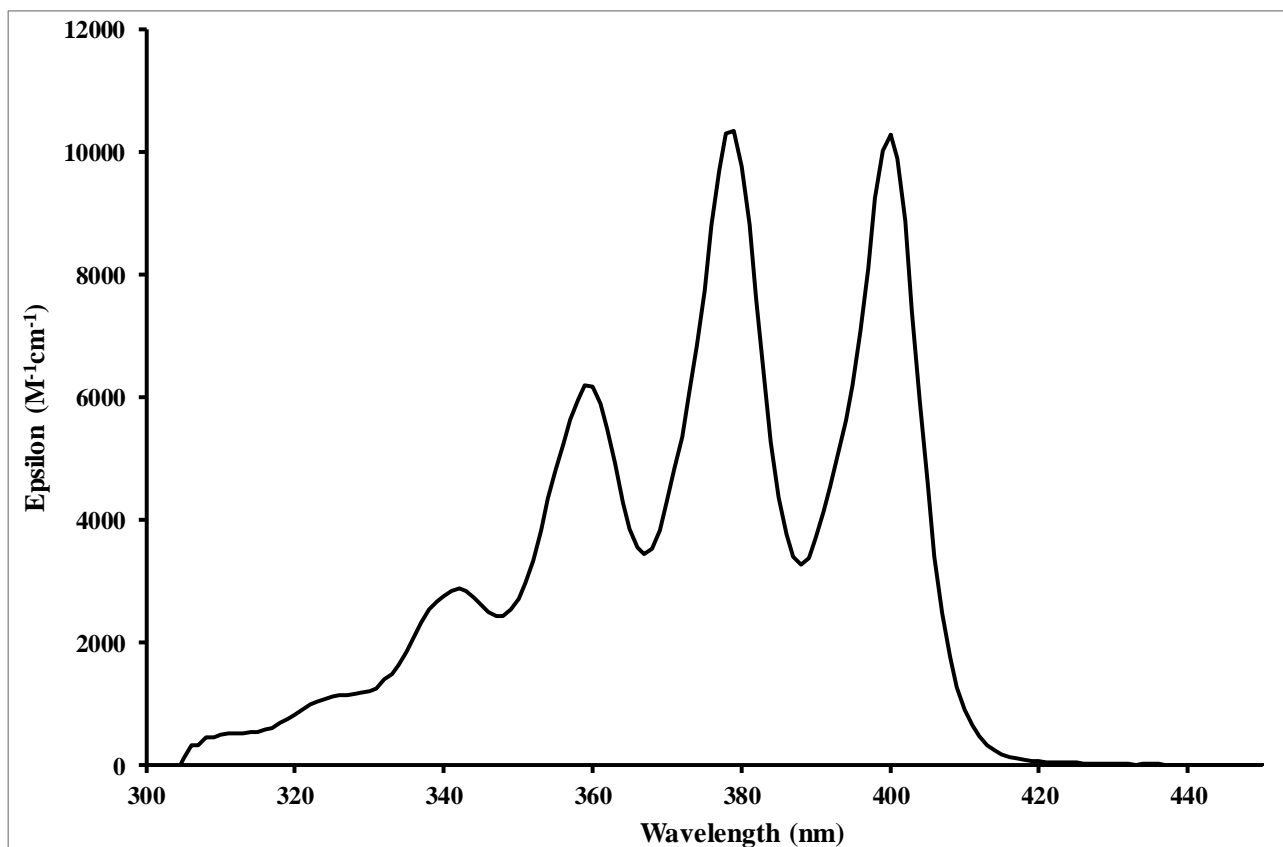

**Figure S47.** UV-Vis absorbance spectrum of DIA recorded in pyridine

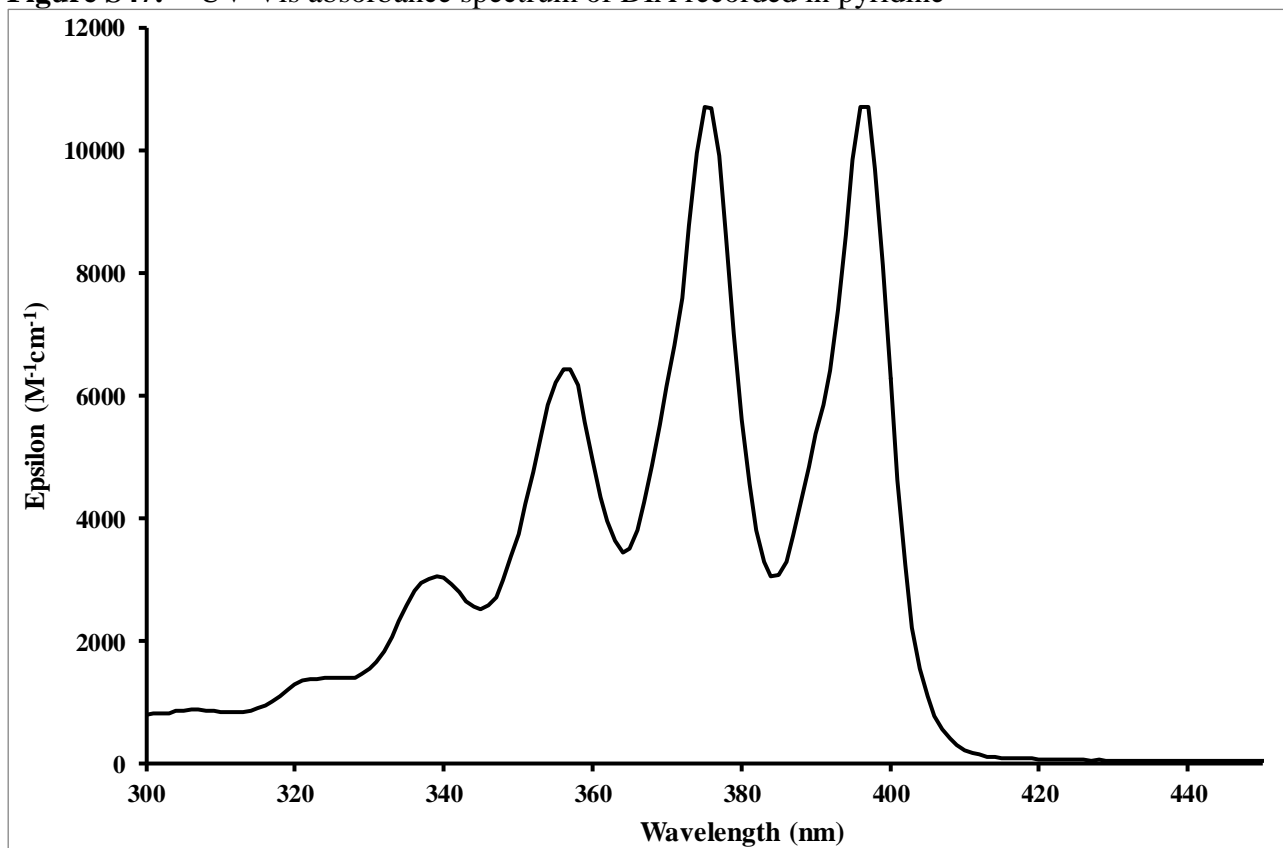

**Figure S48.** UV-Vis absorbance spectrum of DIA recorded in THF

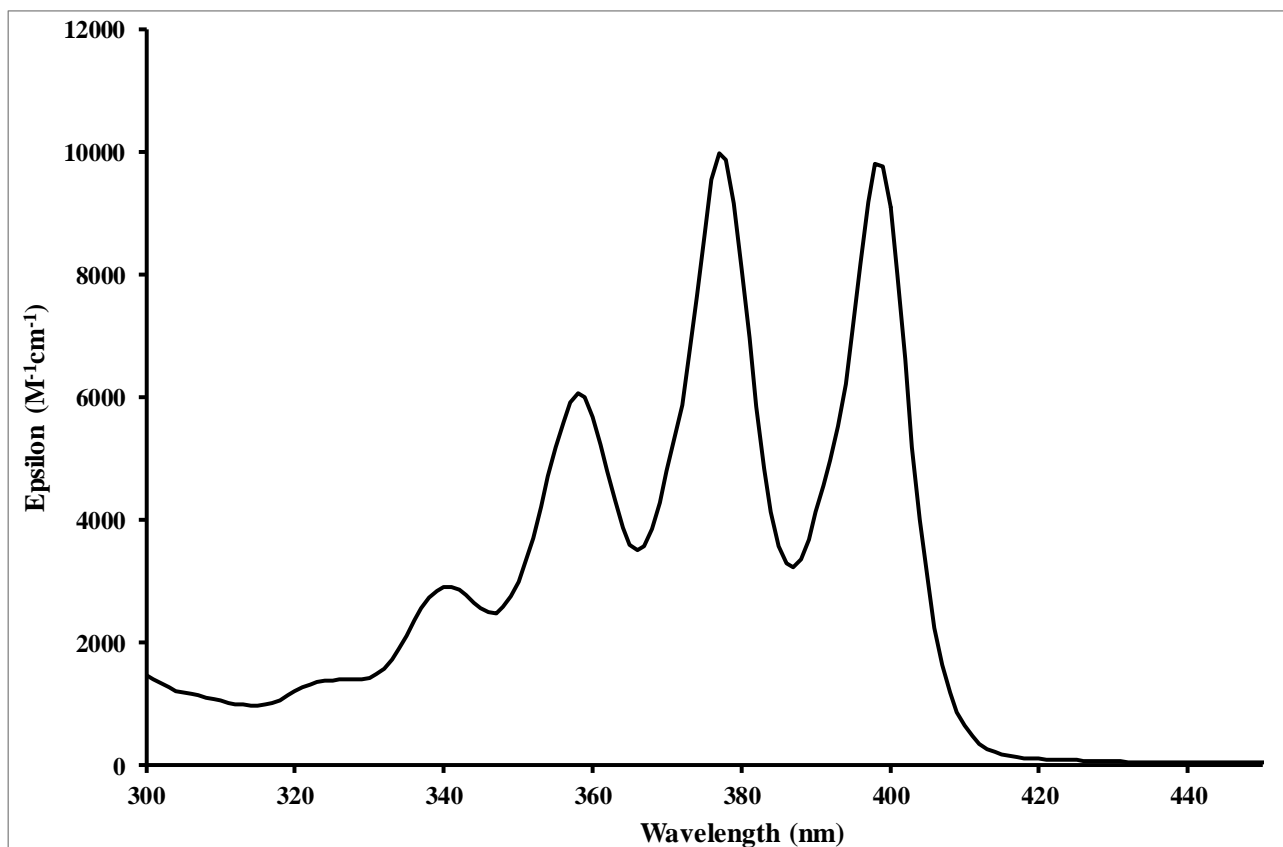

**Figure S49.** UV-Vis absorbance spectrum of DIA recorded in toluene

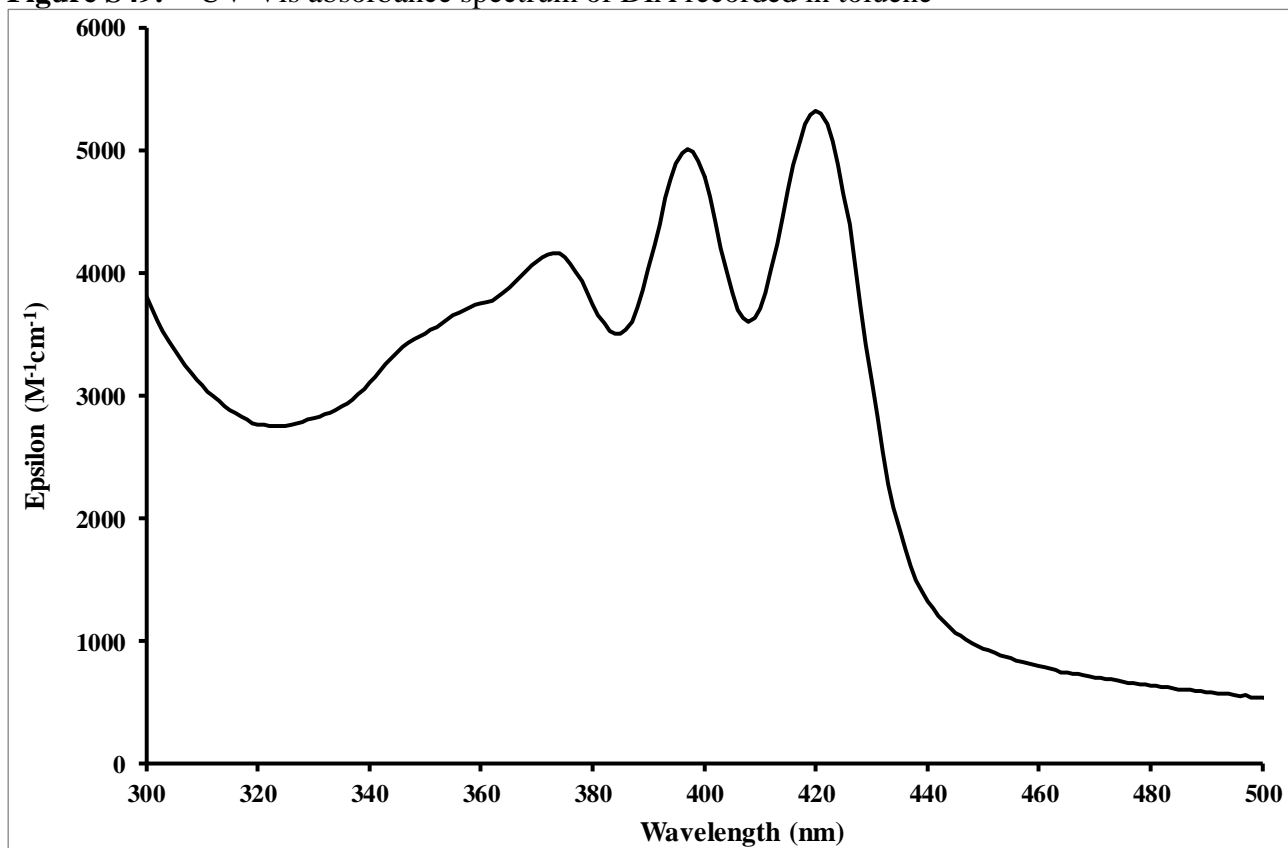

**Figure S50.** UV-Vis absorbance spectrum of DIA recorded in water

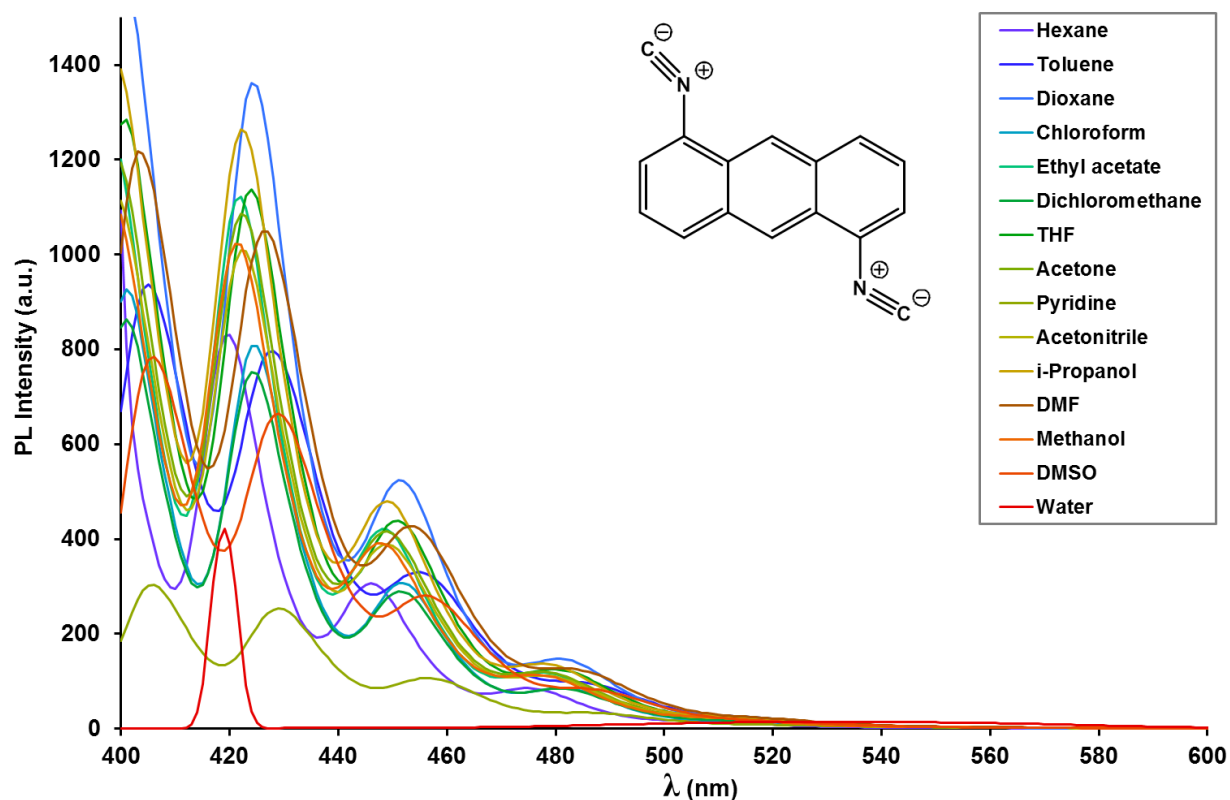

**Figure S51.** The emission spectra of 1,5-diisocyanoanthracene (**DIA**) recorded in solvents of different polarity. ( $c=5\times10^{-5}$  M,  $T=20$  °C,  $V=3.00$  ml).

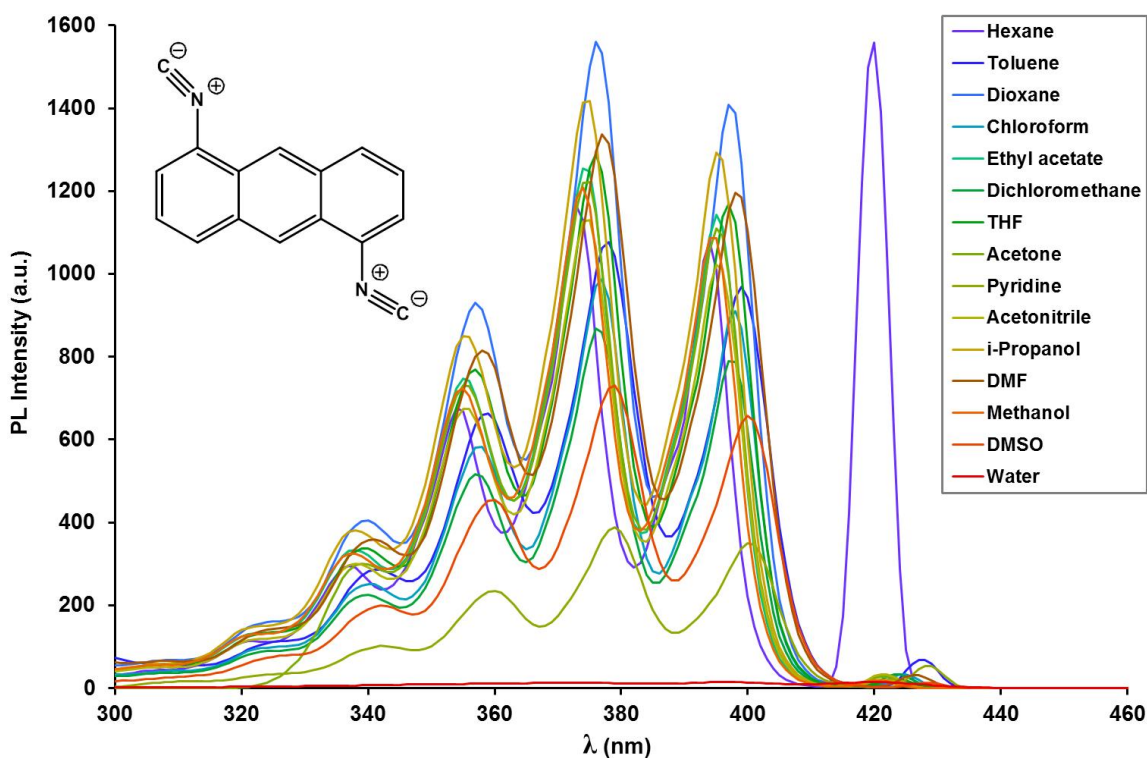

**Figure S52.** The excitation spectra of 1,5-diisocyanoanthracene (**DIA**) recorded in solvents of different polarity. ( $c=5\times10^{-5}$  M,  $T=20$  °C,  $V=3.00$  ml).

| Solvent            | Polarity | $\lambda_{em,max,1}$ | $\lambda_{em,max,2}$ | $\lambda_{em,max,3}$ | $\lambda_{ex,max,1}$ | $\lambda_{ex,max,2}$ | $\lambda_{ex,max,3}$ | $\lambda_{ex,max,4}$ | Stokes shift        | $\epsilon$         | $\Phi_F$ |
|--------------------|----------|----------------------|----------------------|----------------------|----------------------|----------------------|----------------------|----------------------|---------------------|--------------------|----------|
|                    | Index    | (nm)                 | (cm <sup>-1</sup> ) | (M <sup>-1</sup> ) | (%)      |
| Hexane             | 0.0      | 397                  | 420                  | 446                  | 337                  | 354                  | 373                  | 394                  | 3000                | -                  | -        |
| Toluene            | 2.4      | 405                  | 428                  | 455                  | 341                  | 359                  | 378                  | 399                  | 3091                | 9989               | 38       |
| Dichloromethane    | 3.1      | 401                  | 424                  | 451                  | 340                  | 357                  | 376                  | 397                  | 3011                | 10942              | 25       |
| i-propanol         | 3.9      | 398                  | 422                  | 449                  | 338                  | 355                  | 375                  | 395                  | 2970                | 11217              | 38       |
| THF                | 4.0      | 401                  | 424                  | 451                  | 339                  | 357                  | 376                  | 397                  | 3011                | 10720              | 38       |
| Chloroform         | 4.1      | 401                  | 425                  | 452                  | 340                  | 358                  | 377                  | 398                  | 2996                | 11488              | 26       |
| Ethyl acetate      | 4.4      | 397                  | 422                  | 448                  | 338                  | 355                  | 374                  | 395                  | 3041                | 11618              | 30       |
| Dioxane            | 4.8      | 401                  | 424                  | 451                  | 340                  | 357                  | 376                  | 397                  | 3011                | 11258              | 44       |
| Acetone            | 5.1      | 397                  | 422                  | 449                  | 339                  | 355                  | 375                  | 395                  | 2970                | 10852              | 33       |
| Methanol           | 5.1      | 397                  | 421                  | 448                  | 337                  | 355                  | 374                  | 395                  | 2985                | 10784              | 30       |
| Pyridine           | 5.3      | 406                  | 429                  | 456                  | 342                  | 360                  | 379                  | 400                  | 3075                | 10360              | 12       |
| Acetonitrile       | 5.8      | 397                  | 422                  | 449                  | 338                  | 356                  | 375                  | 395                  | 2970                | 11034              | 31       |
| Dimethyl formamide | 6.4      | 403                  | 427                  | 453                  | 341                  | 358                  | 377                  | 398                  | 3106                | 10667              | 42       |
| Dimethyl sulfoxide | 7.2      | 406                  | 429                  | 456                  | 342                  | 360                  | 379                  | 400                  | 3075                | 10836              | 30       |
| Water              | 9.0      | -                    | -                    | -                    | -                    | -                    | -                    | -                    | -                   | -                  | -        |



## Chapter IV. 1-N-methylamino-5-isocyanoanthracene (MICAA)

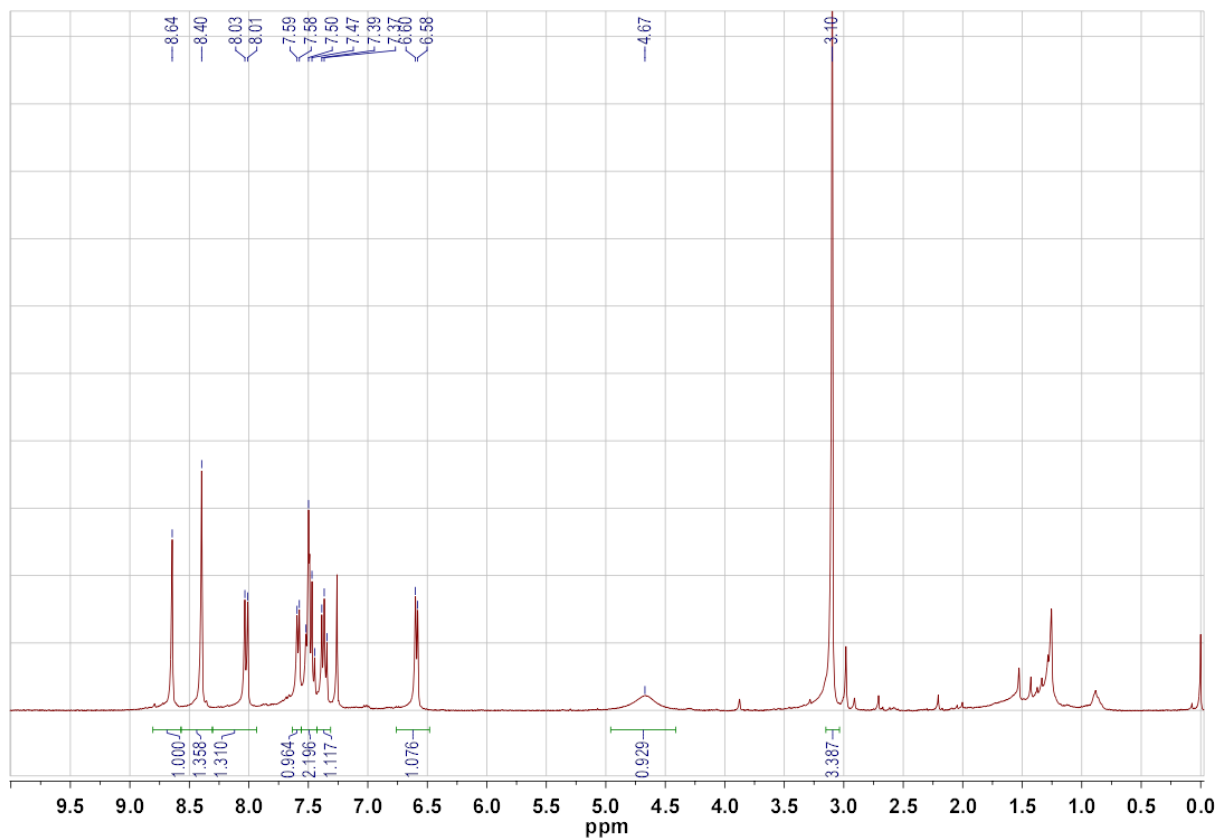

**Figure S53.** <sup>1</sup>H-NMR spectra of MICAA recorded at 20 °C in CDCl<sub>3</sub>

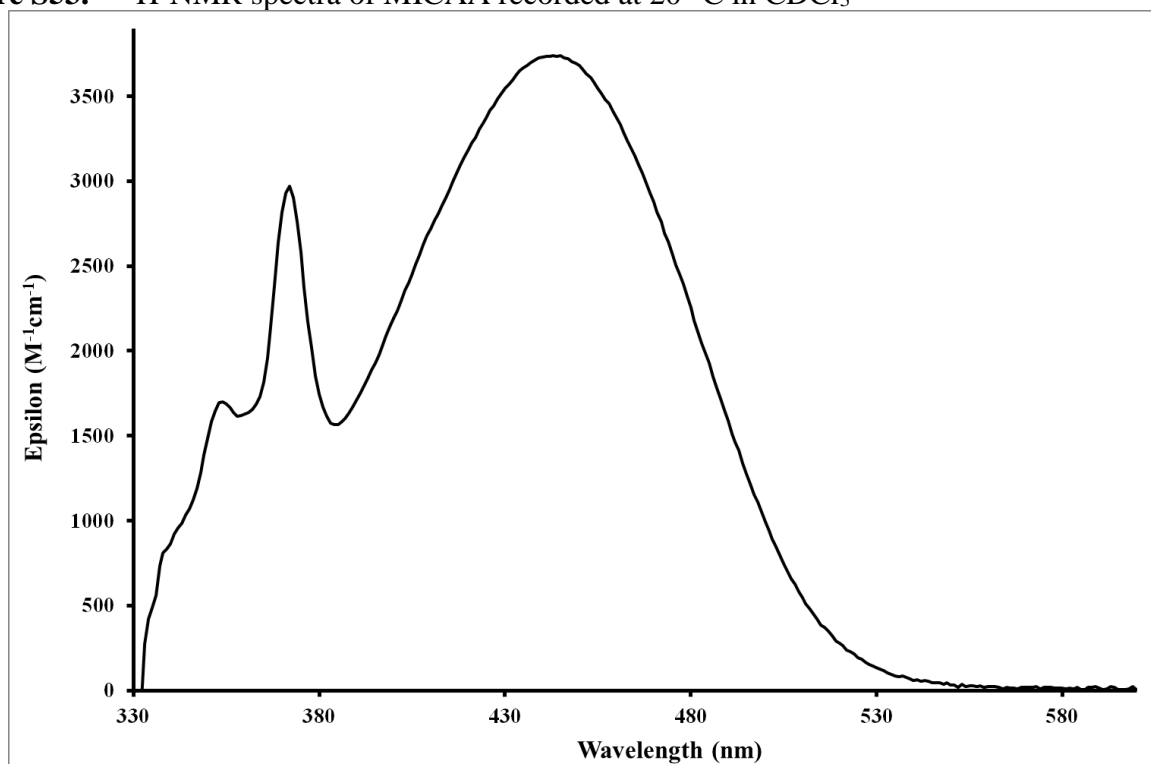

**Figure S54.** UV-Vis absorbance spectrum of MICA A recorded in acetone

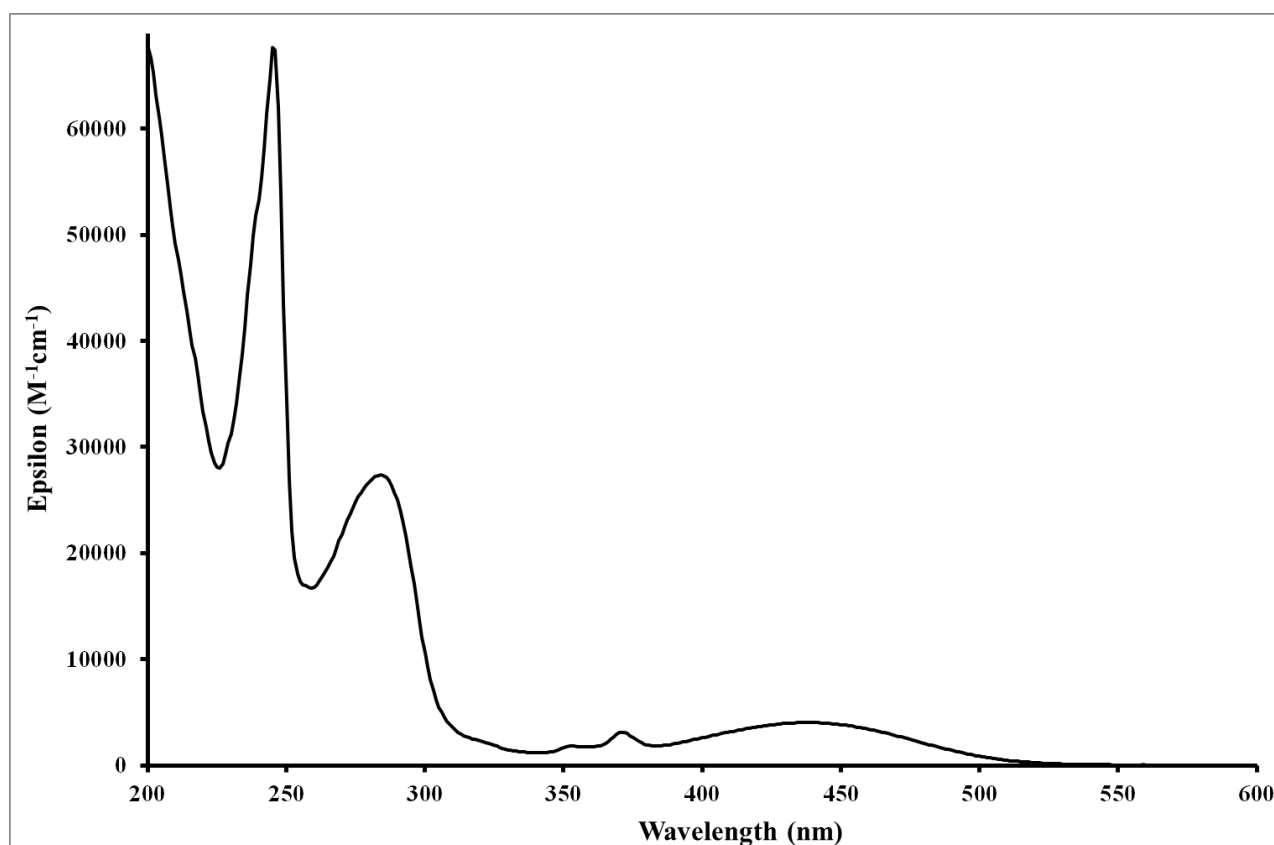

**Figure S55.** UV-Vis absorbance spectrum of MICA A recorded in acetonitrile

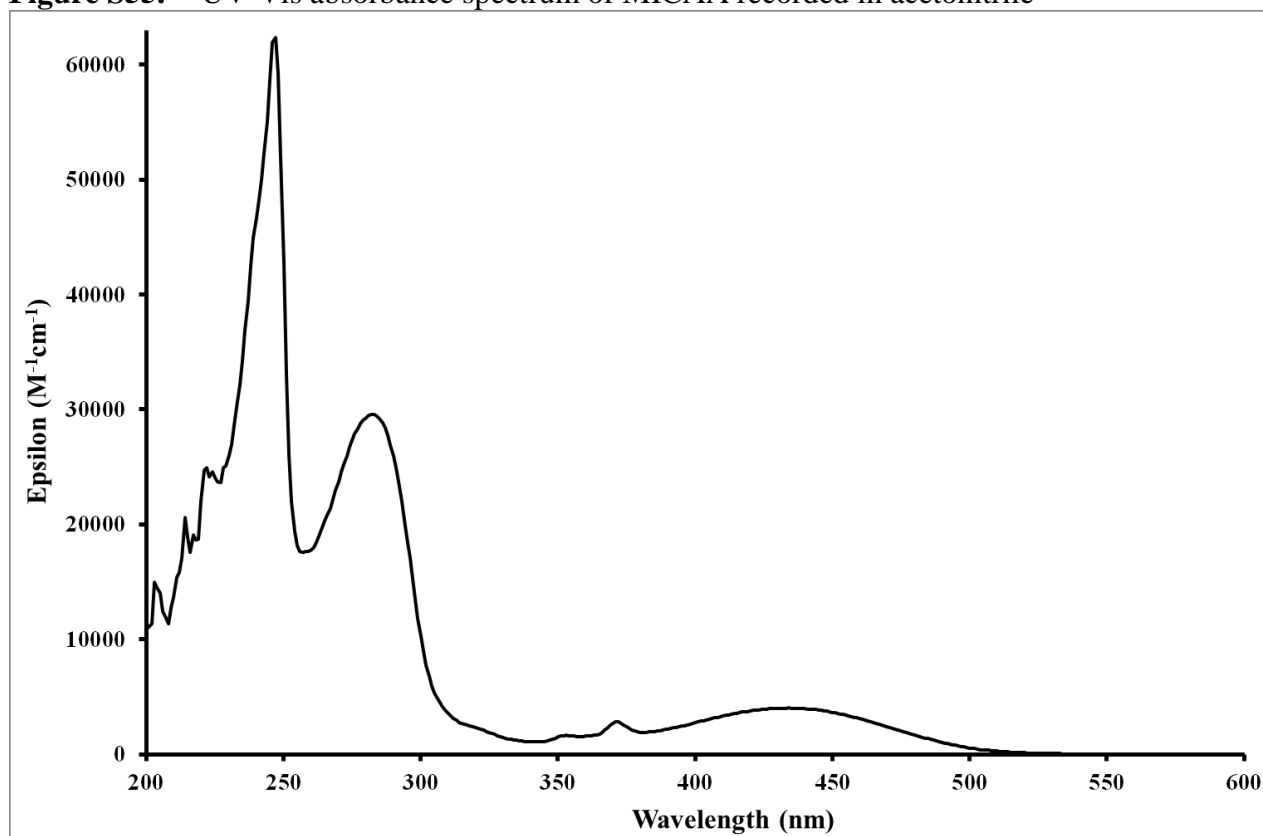

**Figure S56.** UV-Vis absorbance spectrum of MICA A recorded in dichloromethane

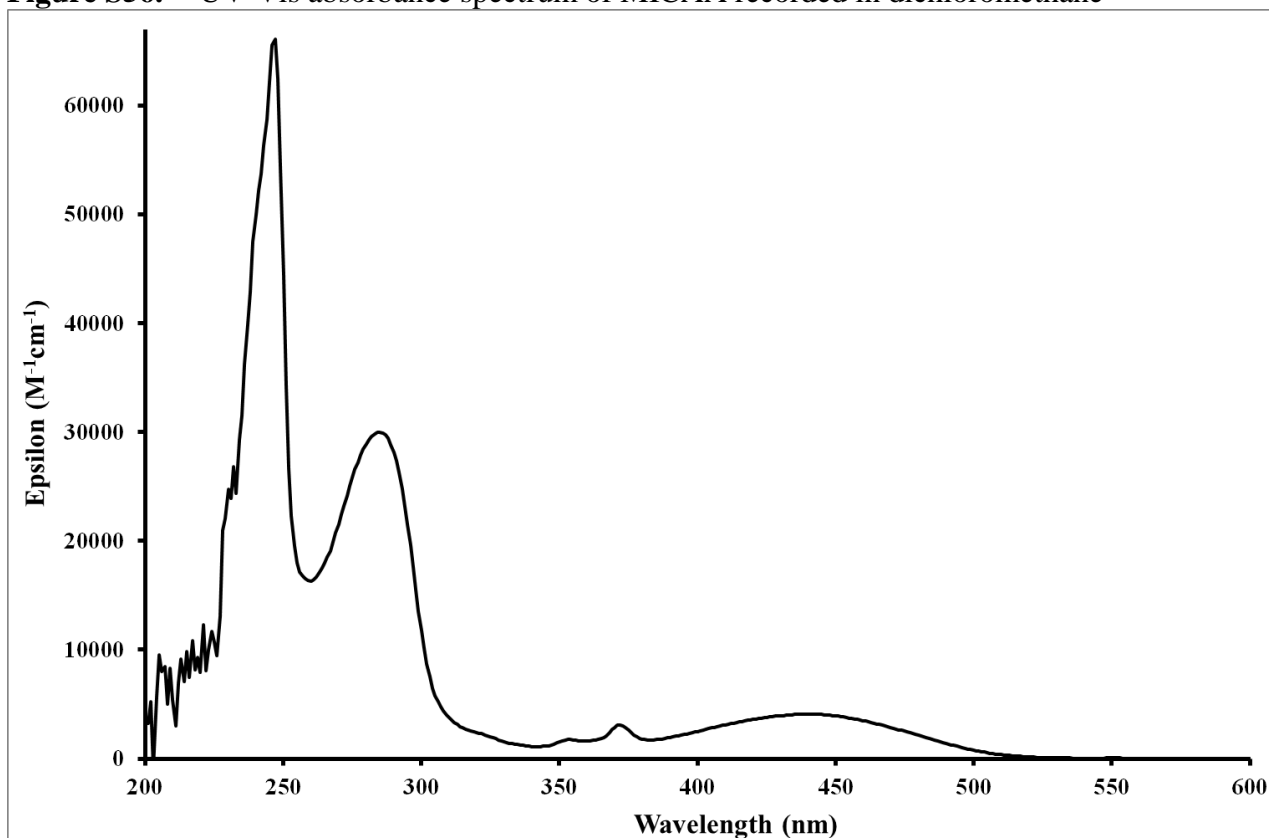

**Figure S57.** Dioxane UV-Vis absorbance spectrum of MICA A recorded in dioxane

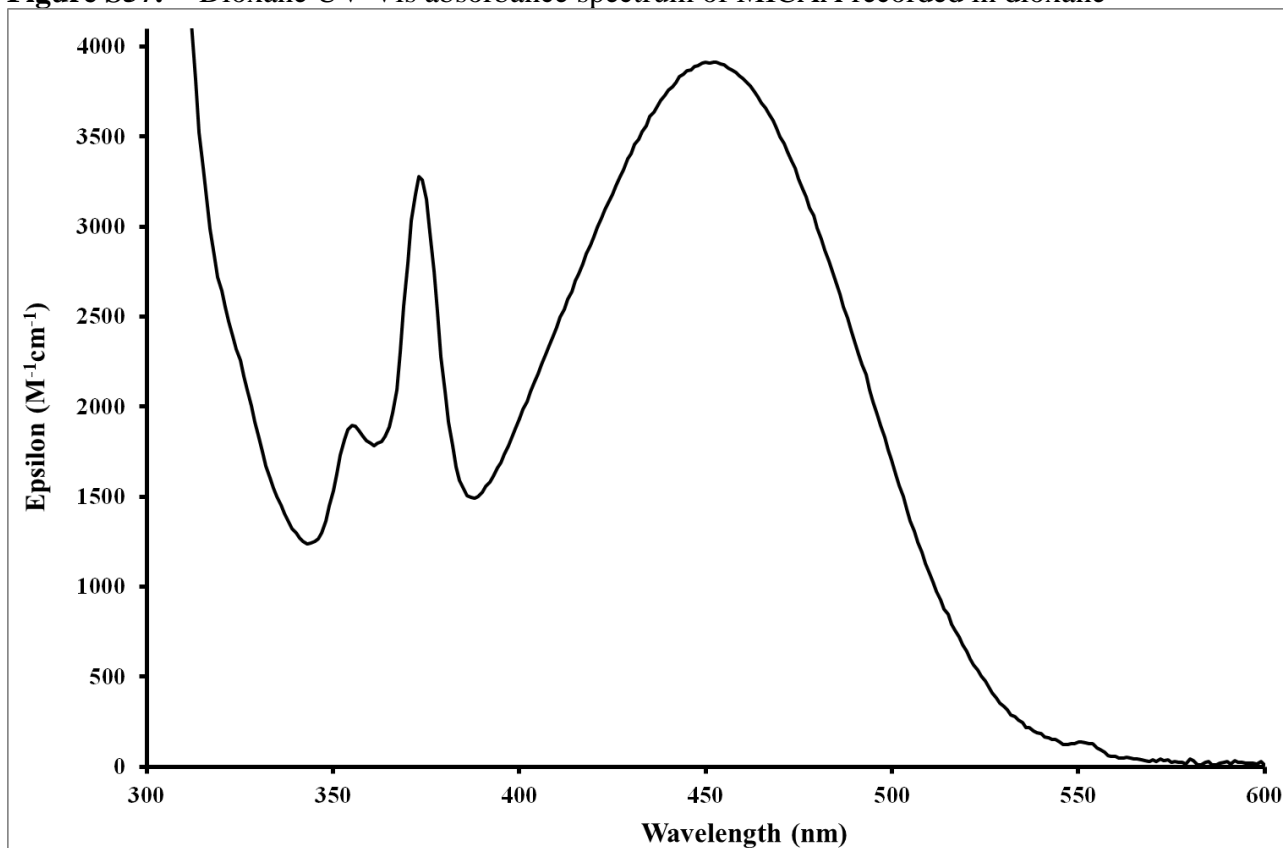

**Figure S58.** UV-Vis absorbance spectrum of MICA A recorded in DMF

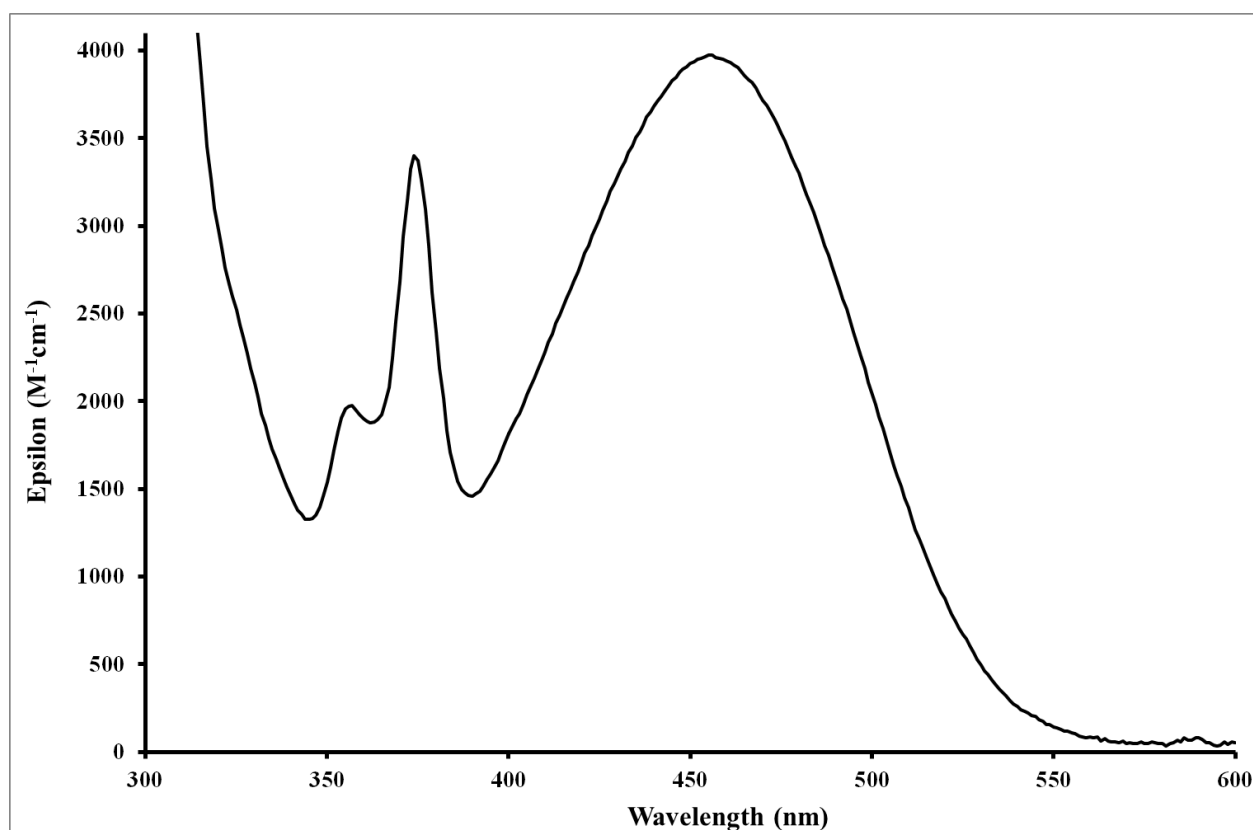

**Figure S59.** UV-Vis absorbance spectrum of MICA in DMSO

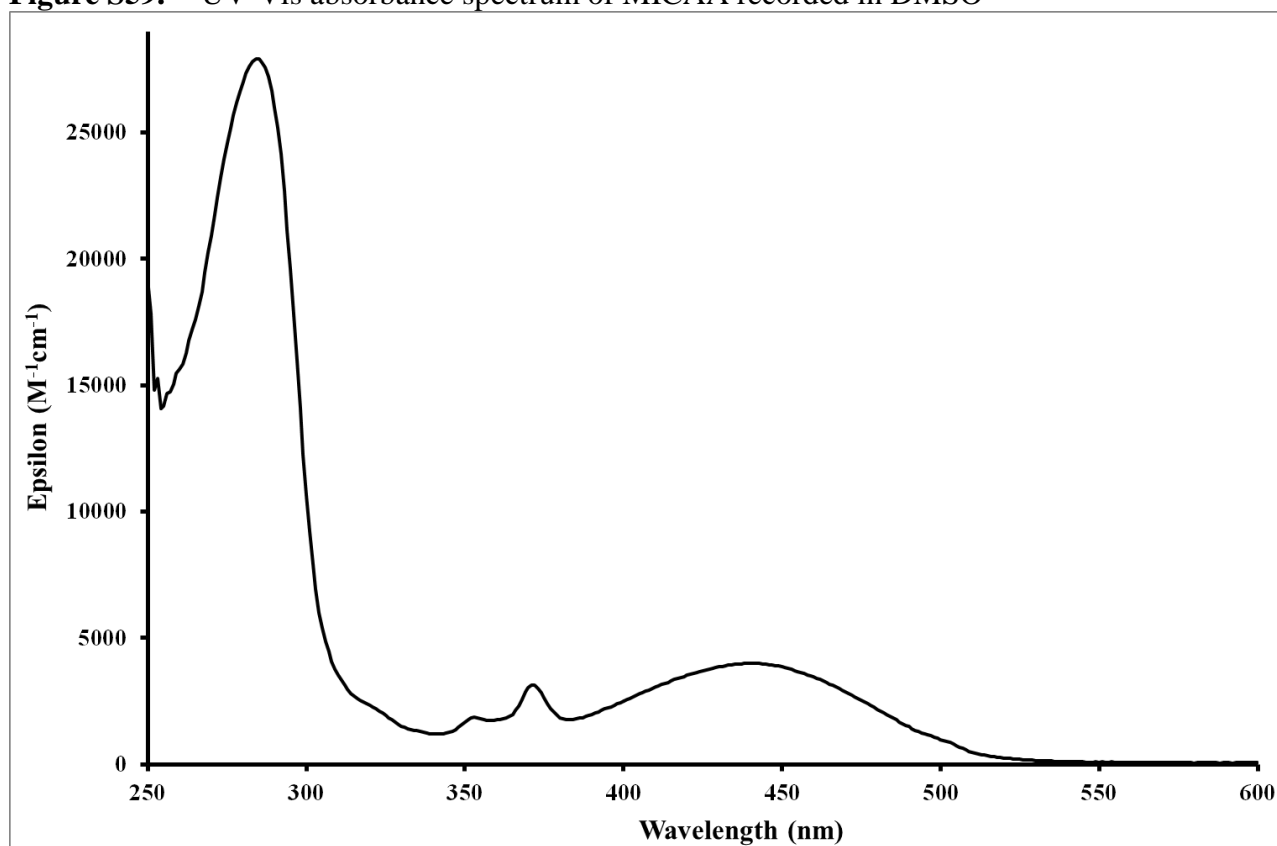

**Figure S60.** UV-Vis absorbance spectrum of MICA A recorded in ethyl-acetate

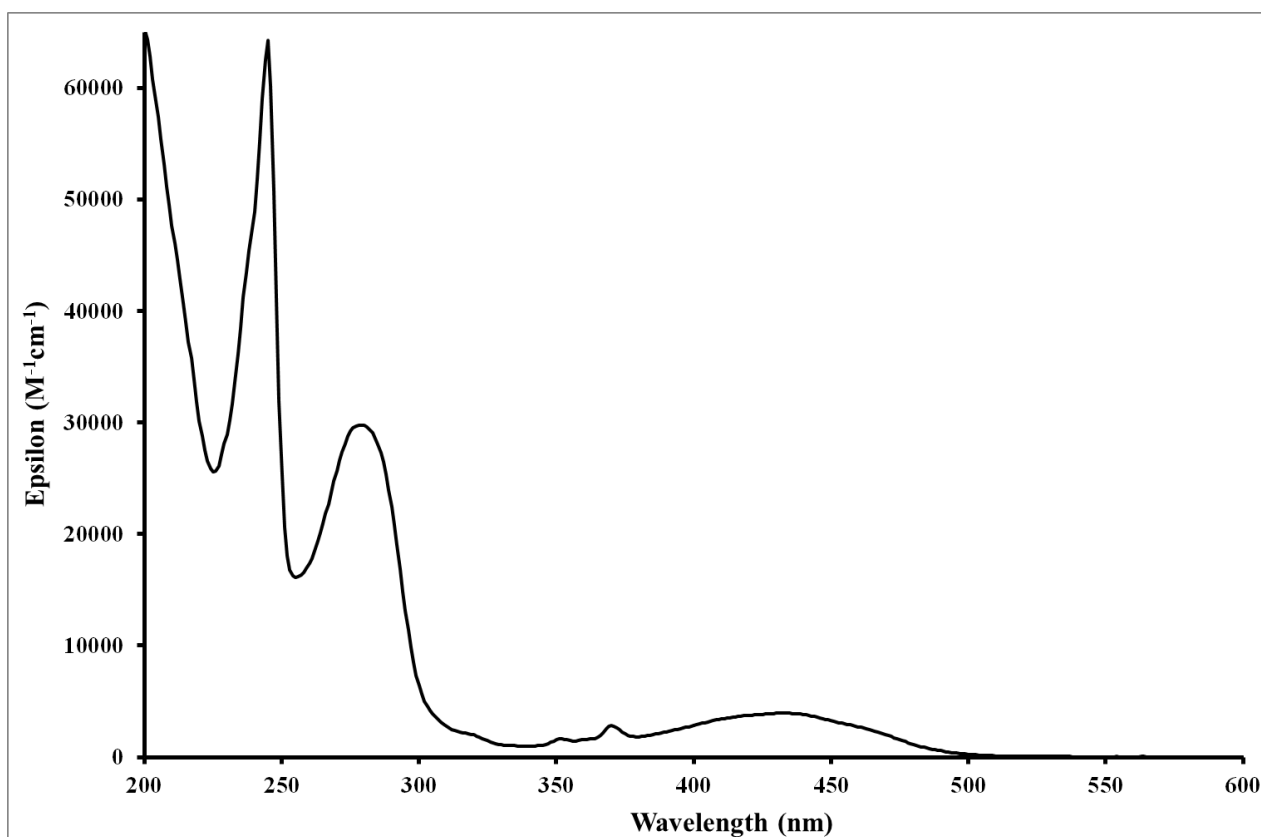

**Figure S61.** UV-Vis absorbance spectrum of MICA A recorded in hexane

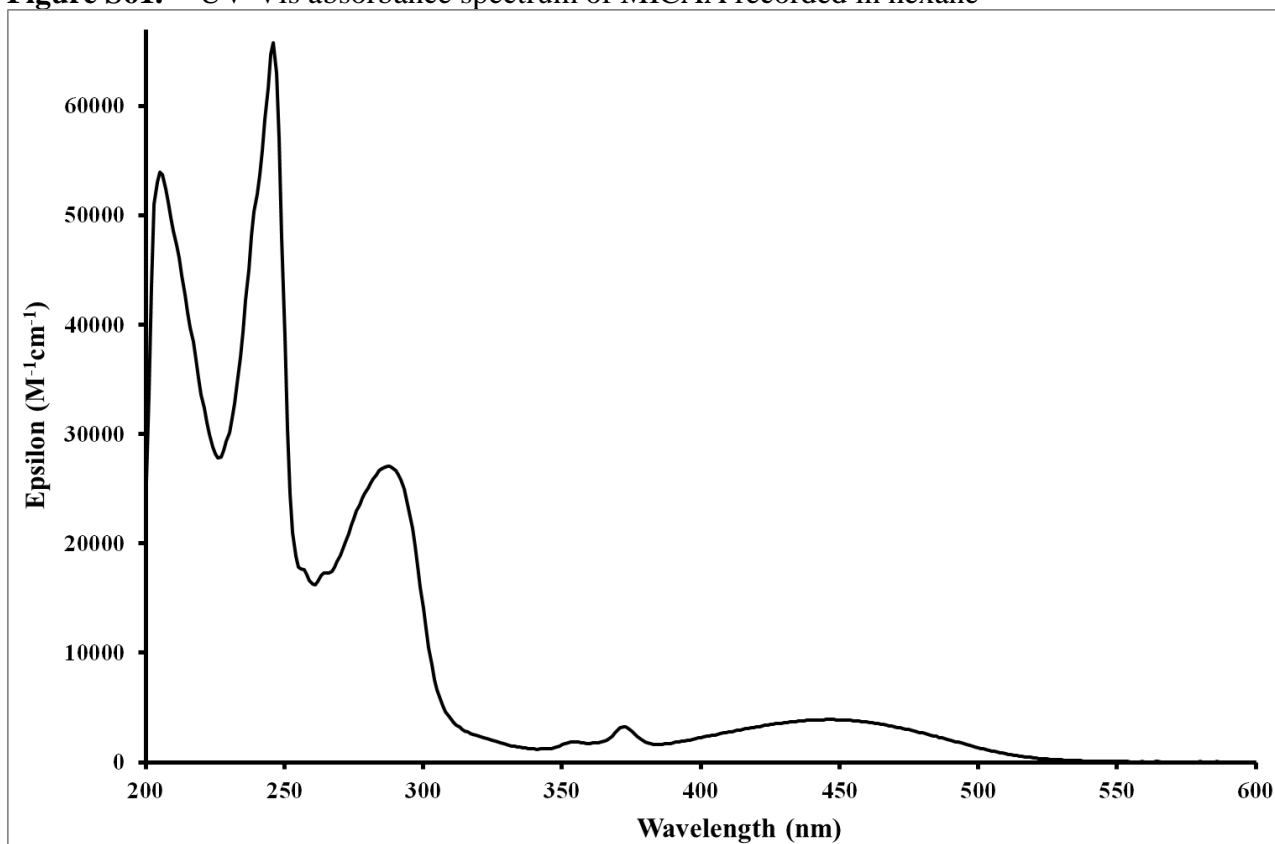

**Figure S62.** UV-Vis absorbance spectrum of MICA A recorded in isopropanole

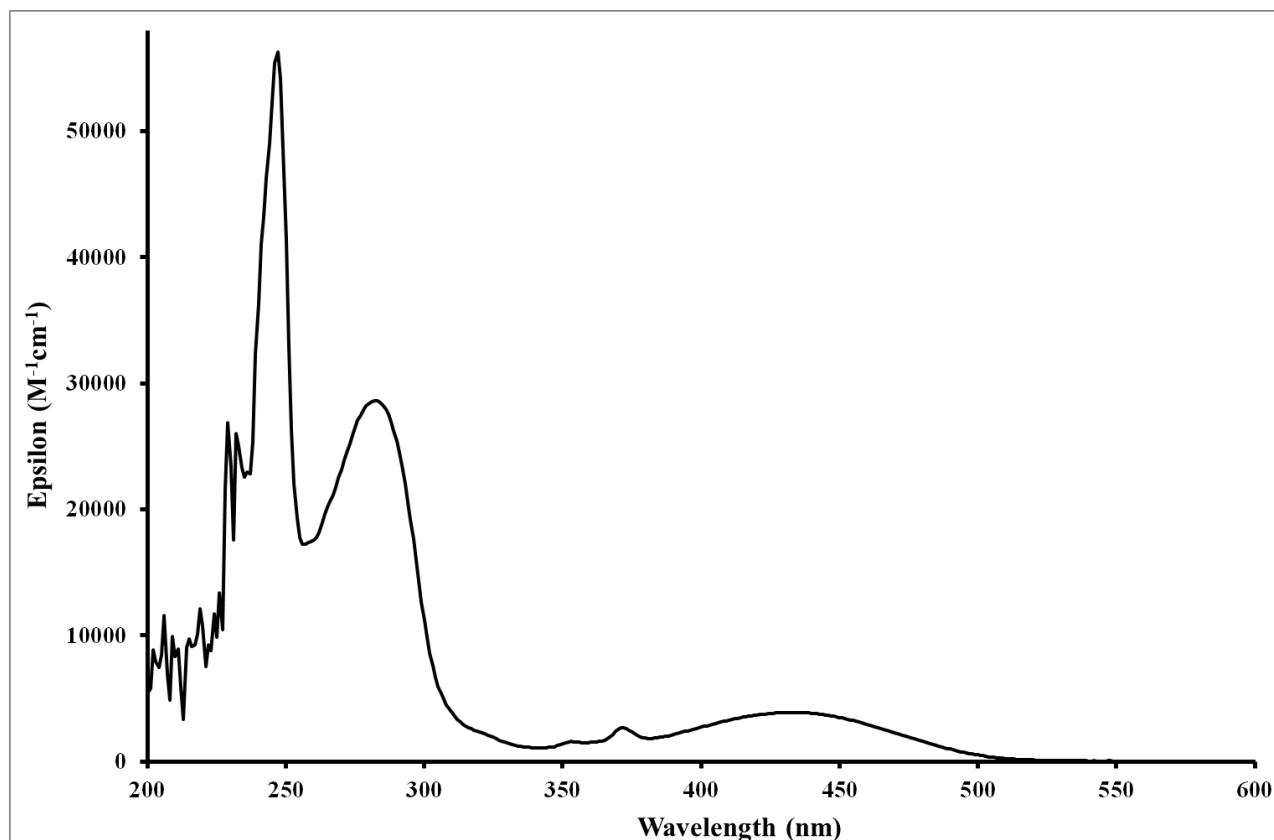

**Figure S63.** UV-Vis absorbance spectrum of MICA recorded in chloroform

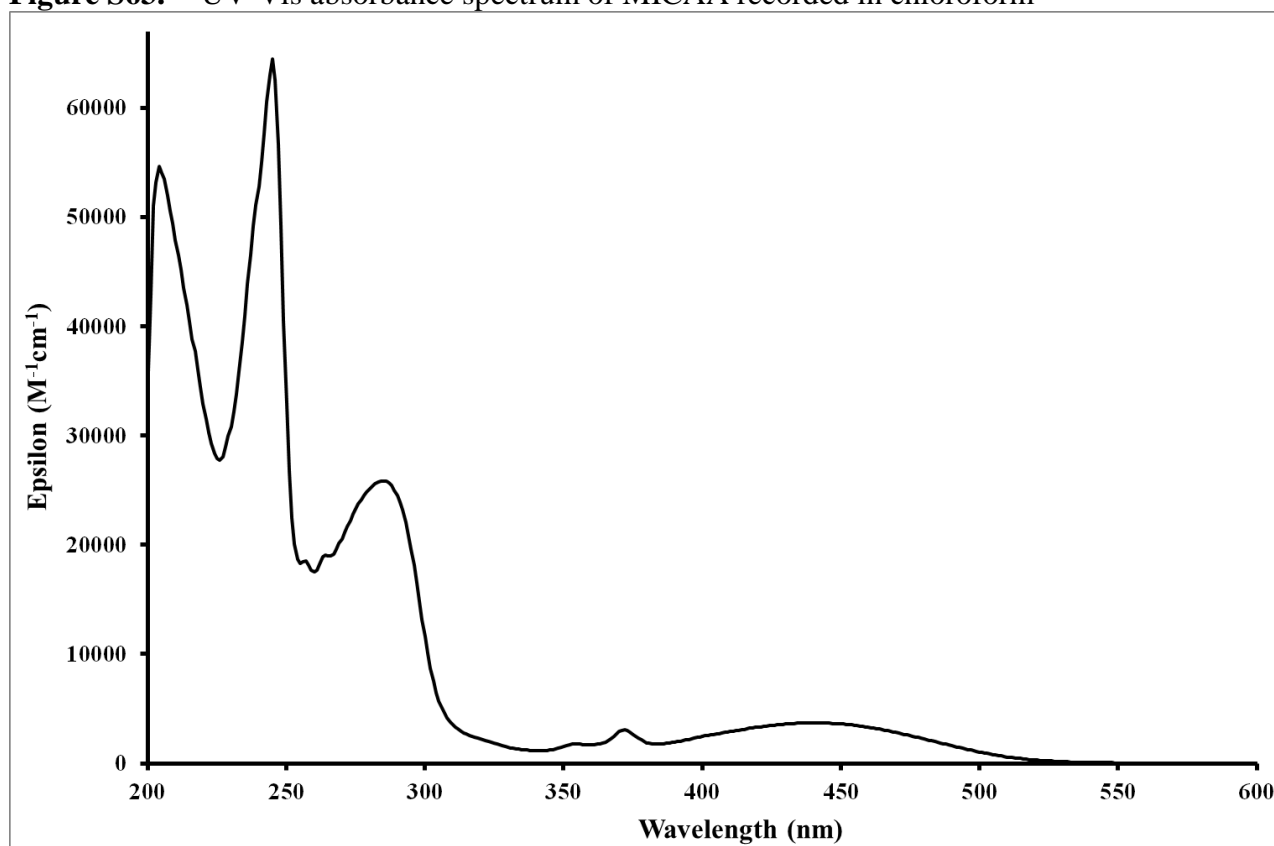

**Figure S64.** UV-Vis absorbance spectrum of MICA recorded in methanol

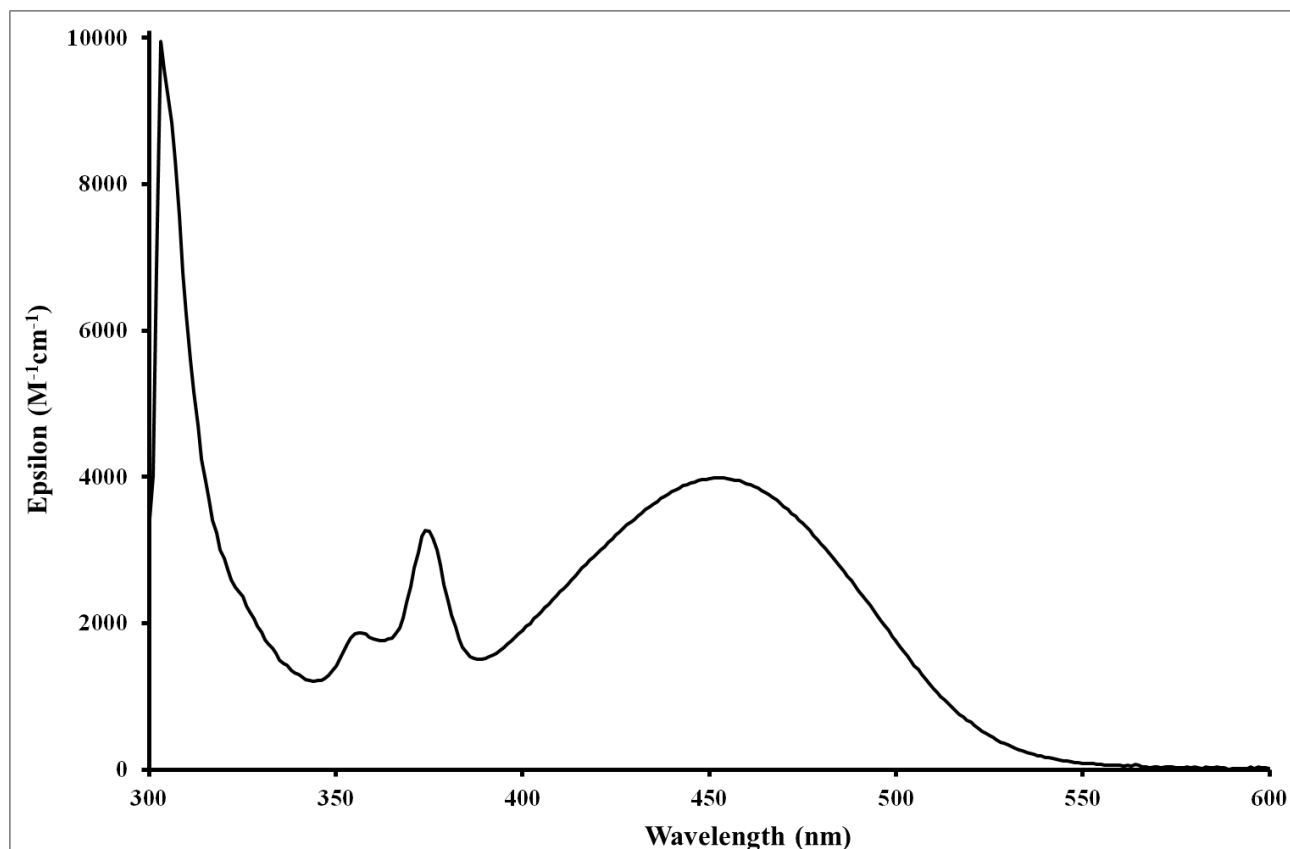

**Figure S65.** UV-Vis absorbance spectrum of MICA in pyridine

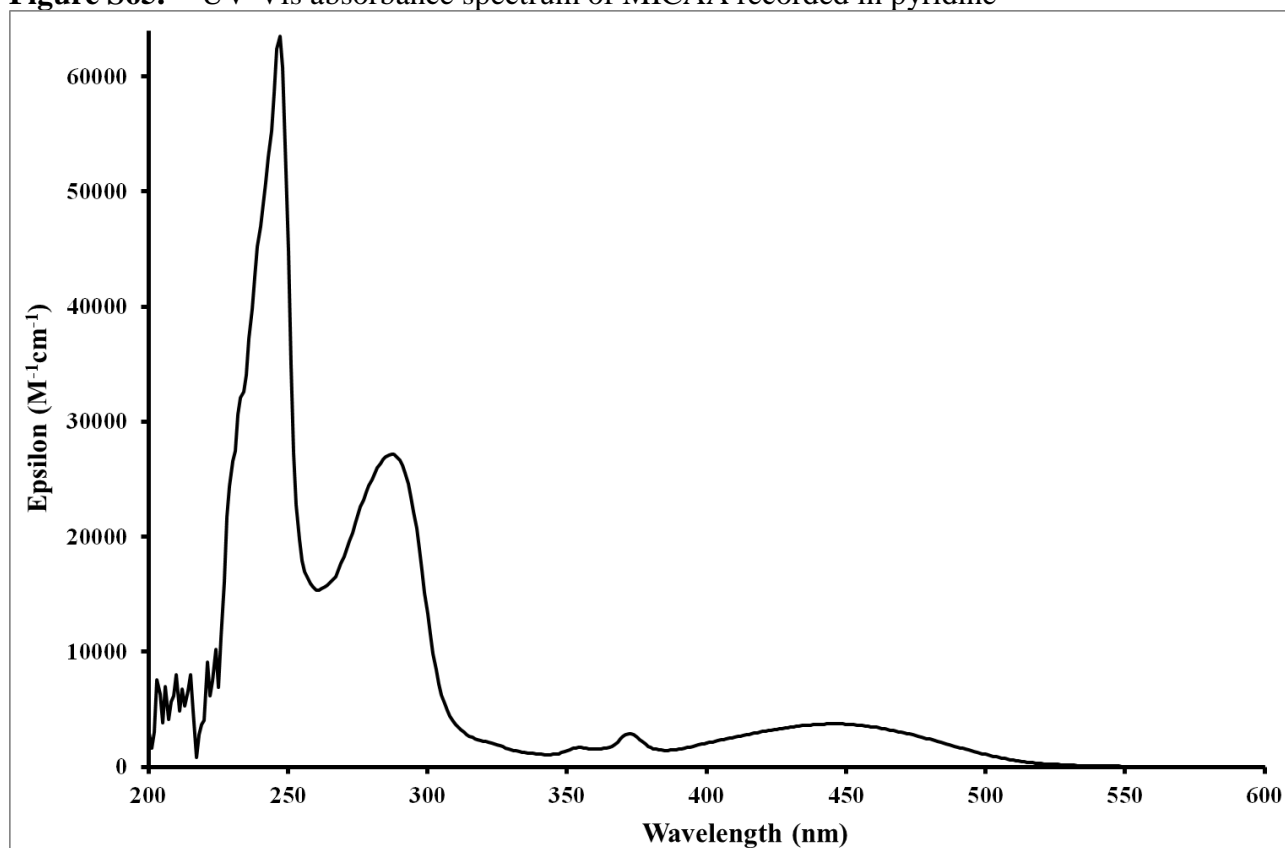

**Figure S66.** UV-Vis absorbance spectrum of MICA in tetrahydrofuran

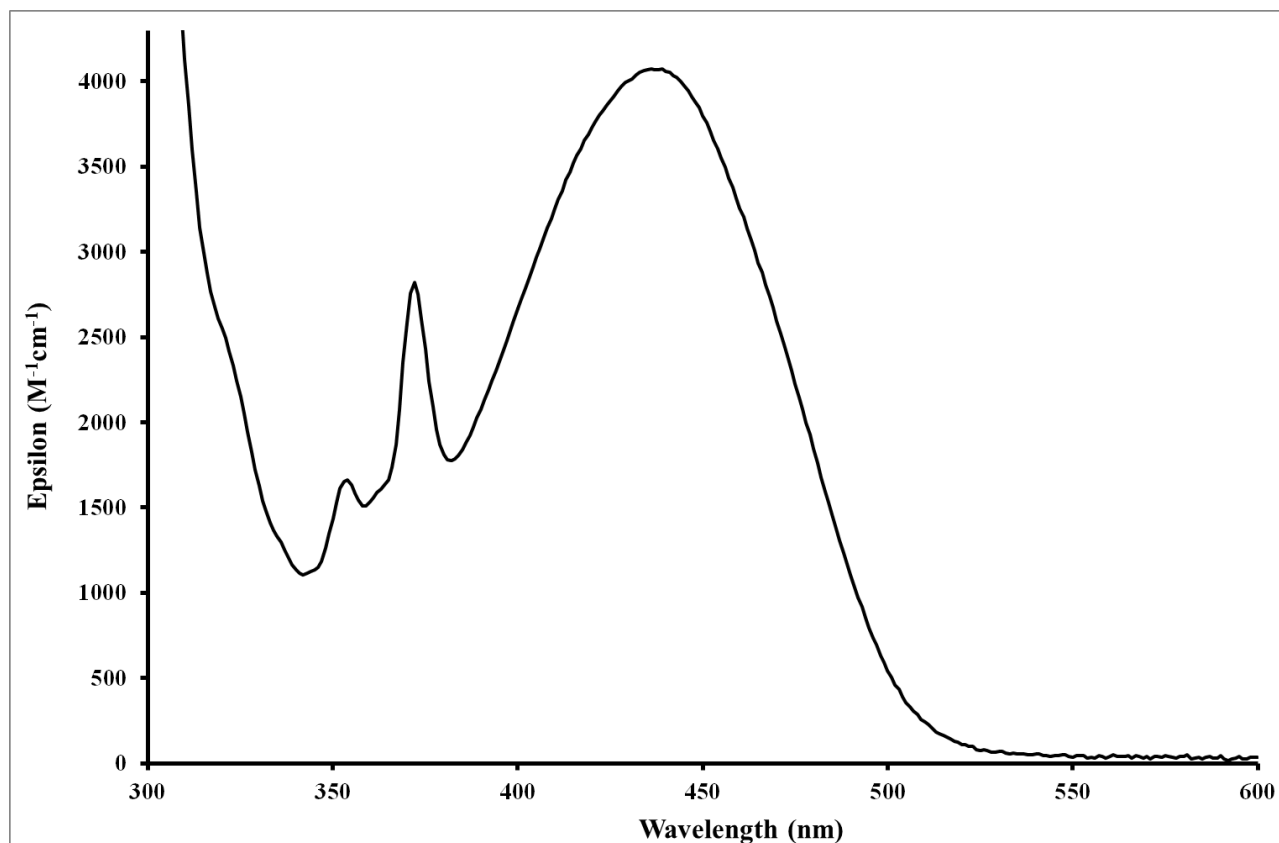

**Figure S67.** UV-Vis absorbance spectrum of MICA in toluene

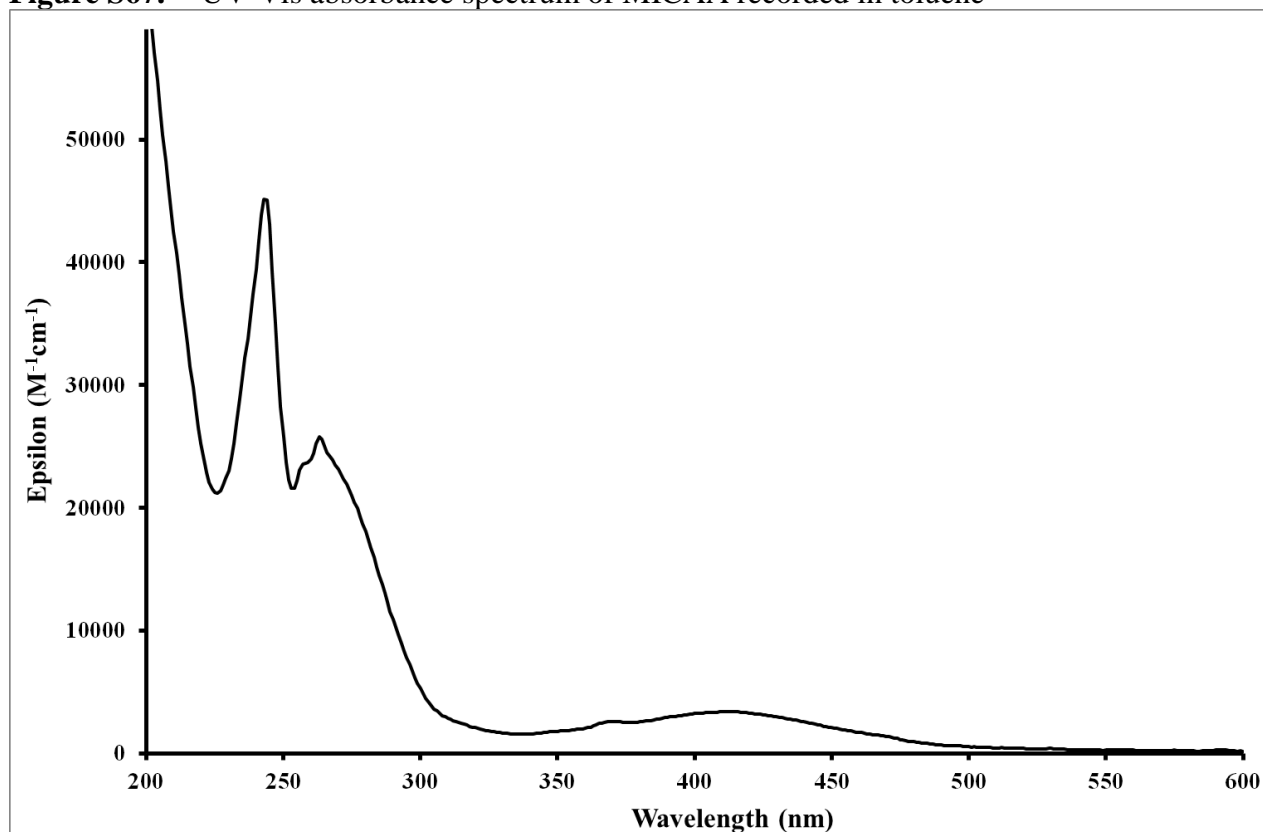

**Figure S68.** UV-Vis absorbance spectrum of MICA in water



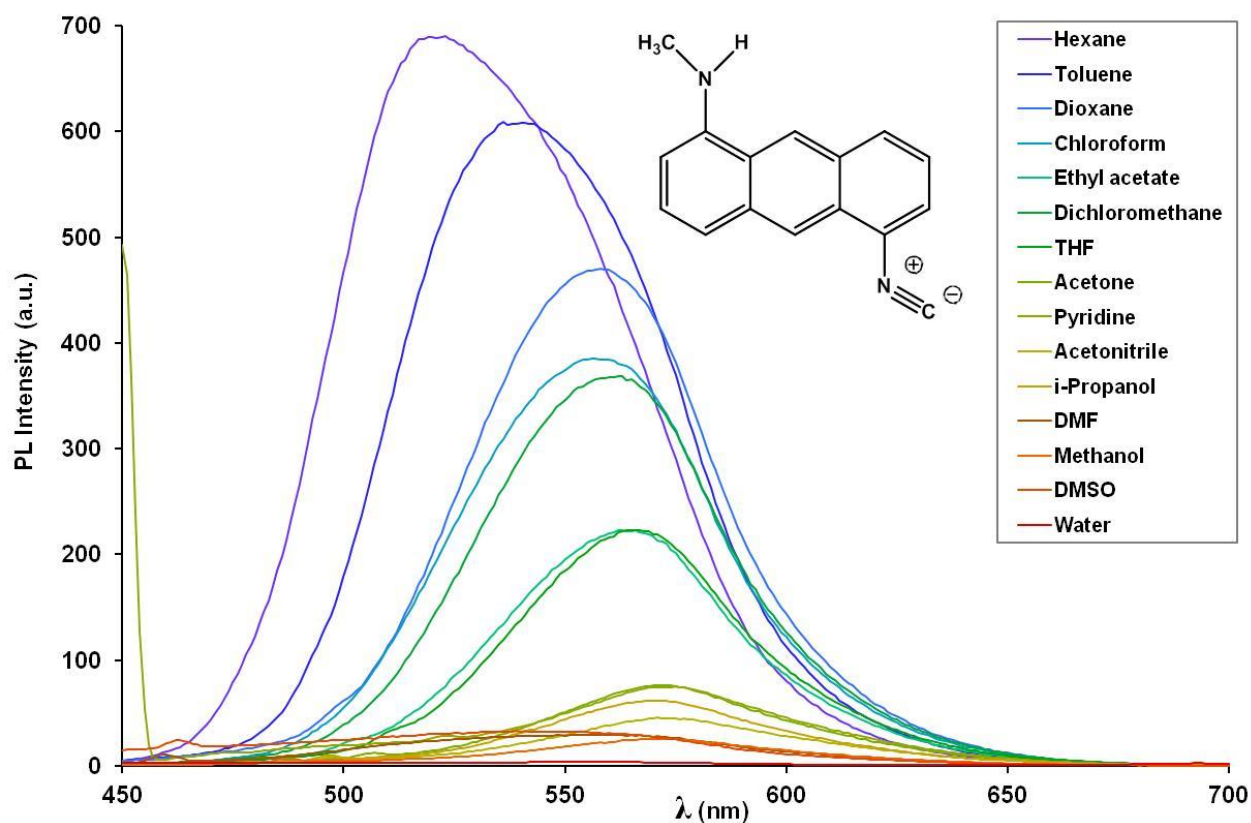

**Figure S69.** The emission spectra of 1-N-methylamino-5-isocyanoanthracene (MICA) recorded in solvents of different polarity. ( $c=5\times10^{-5}$  M,  $T=20$  °C,  $V=3.00$  ml).

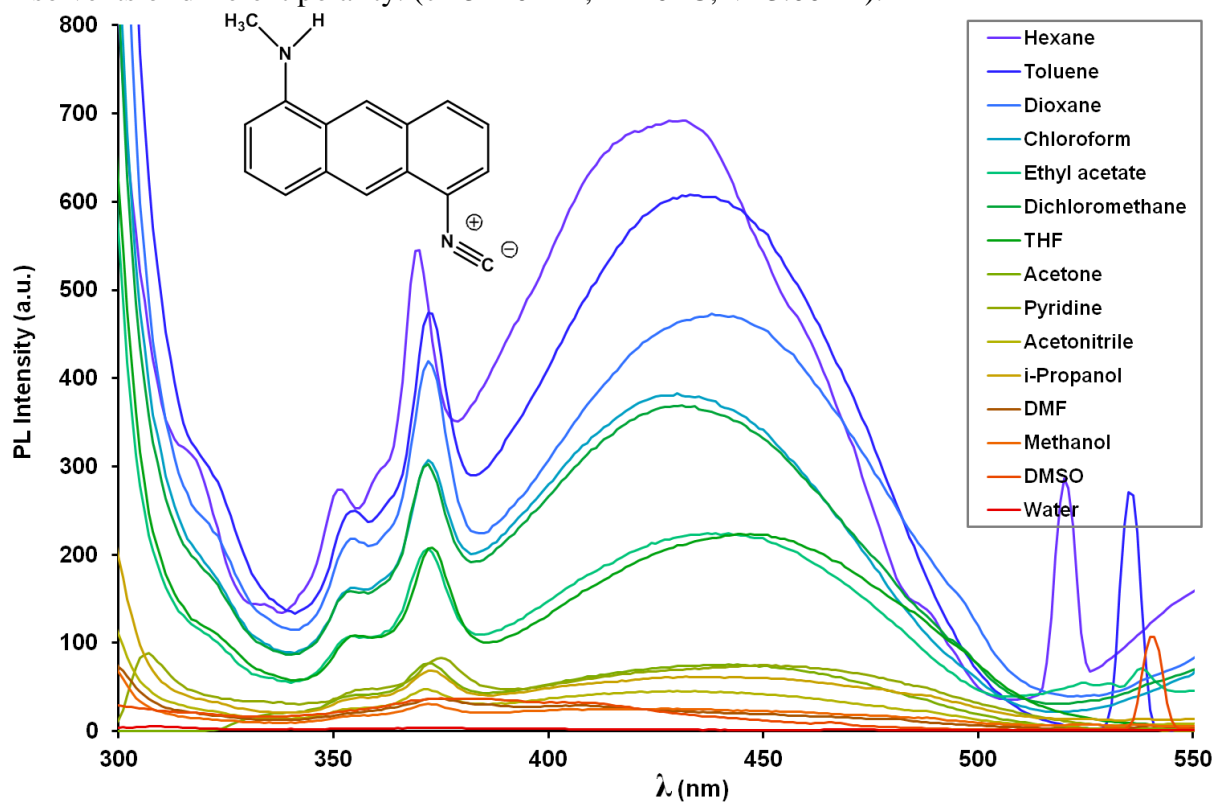

**Figure S70.** The excitation spectra of 1-N-methylamino-5-isocyanoanthracene (MICA) recorded in solvents of different polarity. ( $c=5\times10^{-5}$  M,  $T=20$  °C,  $V=3.00$  ml).

## Chapter V. 1-N,N-dimethylamino-5-isocyanoanthracene (DIMICAA)

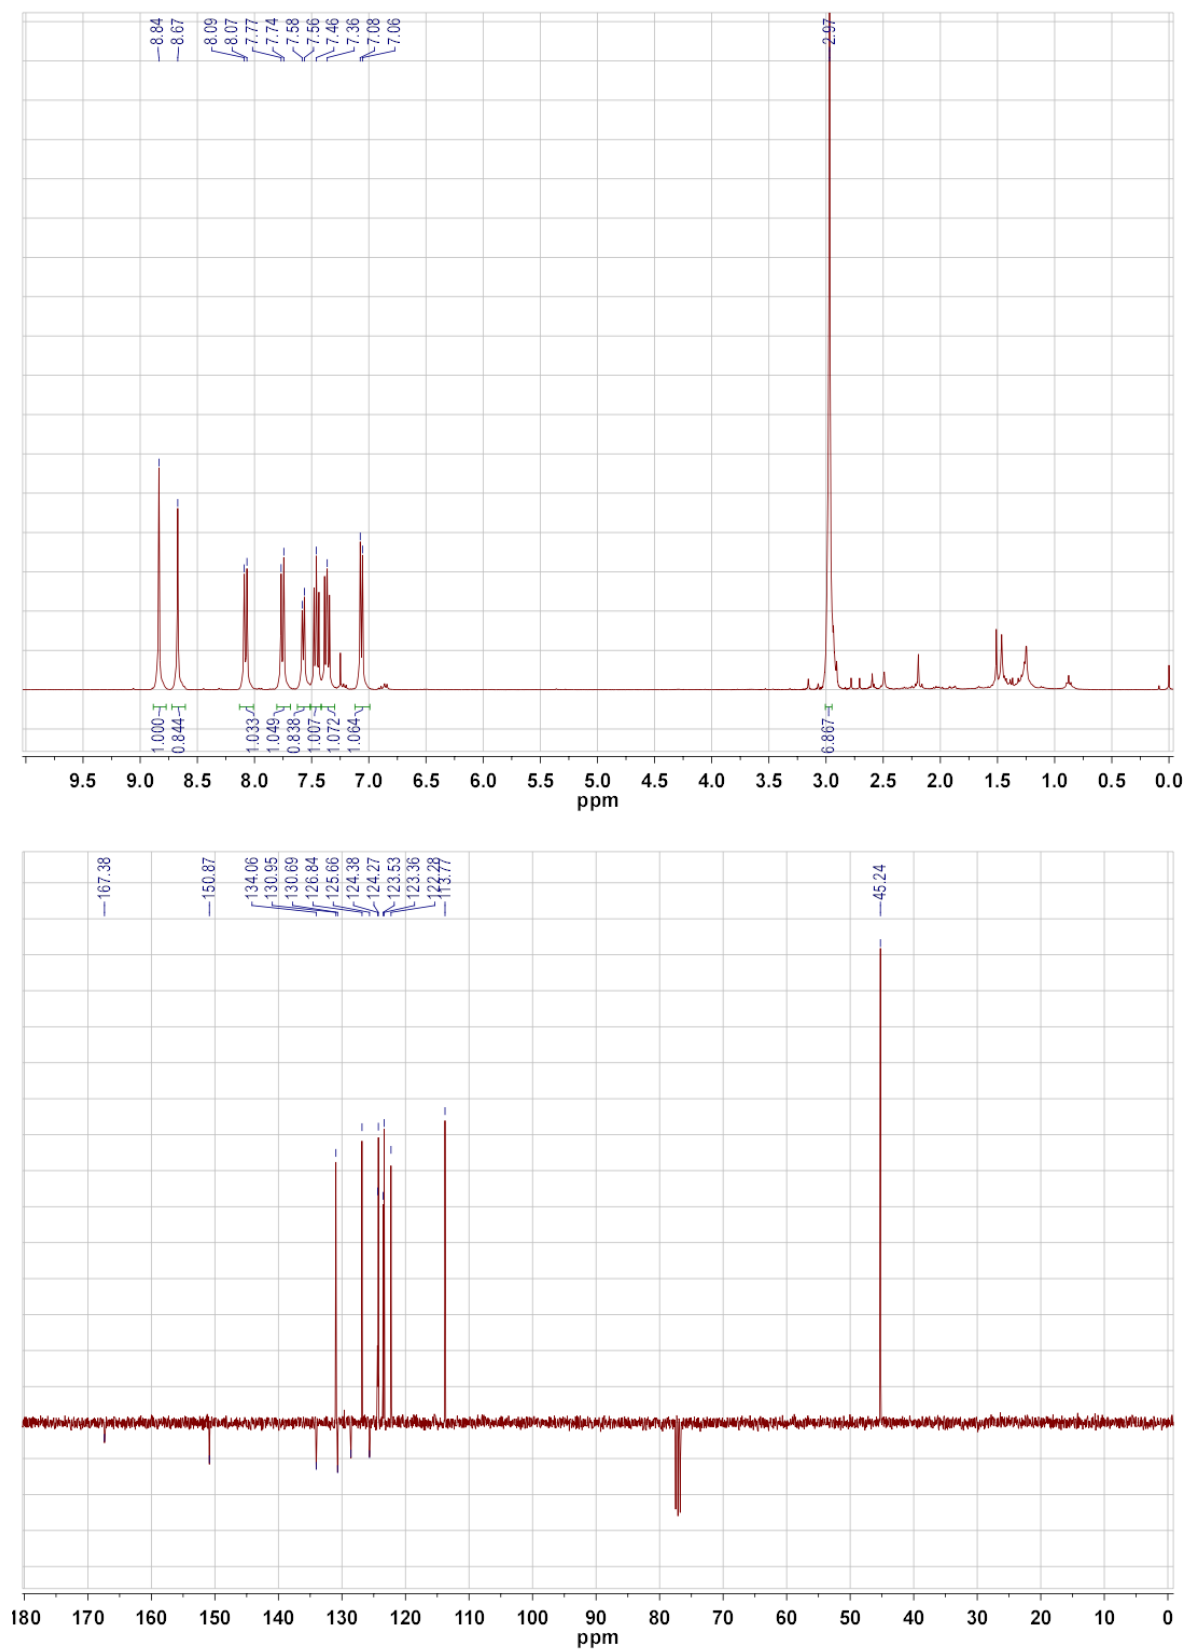

**Figure S71.**  $^1\text{H}$ -NMR (top) and  $^{13}\text{C}$ -NMR (bottom) spectra of 1-N,N-dimethylamino-5-isocyanoanthracene (DIMICAA) recorded at 20 °C in  $\text{CDCl}_3$

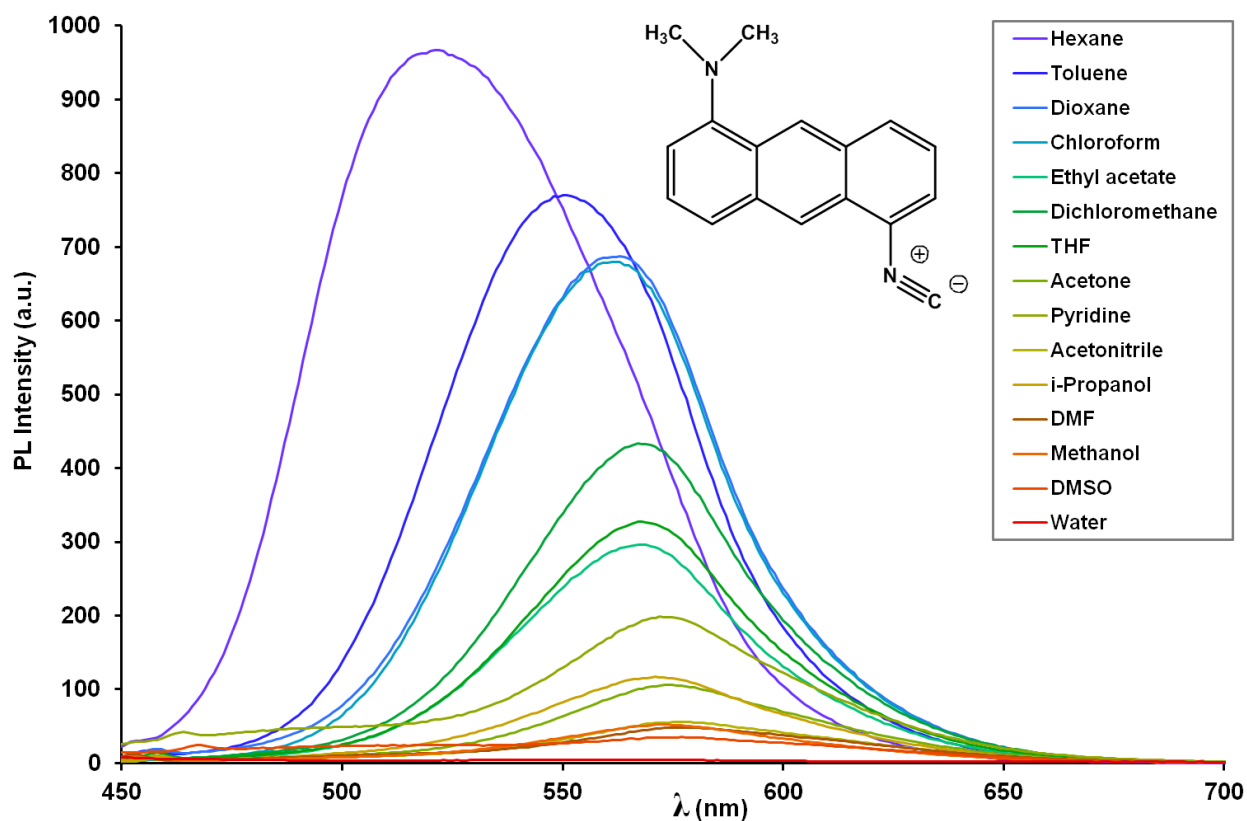

**Figure S72.** The emission spectra of 1-N,N-dimethylamino-5-isocyanoanthracene (DIMICAA) recorded in solvents of different polarity. ( $c=5\times10^{-5}$  M,  $T=20$  °C,  $V=3.00$  ml).

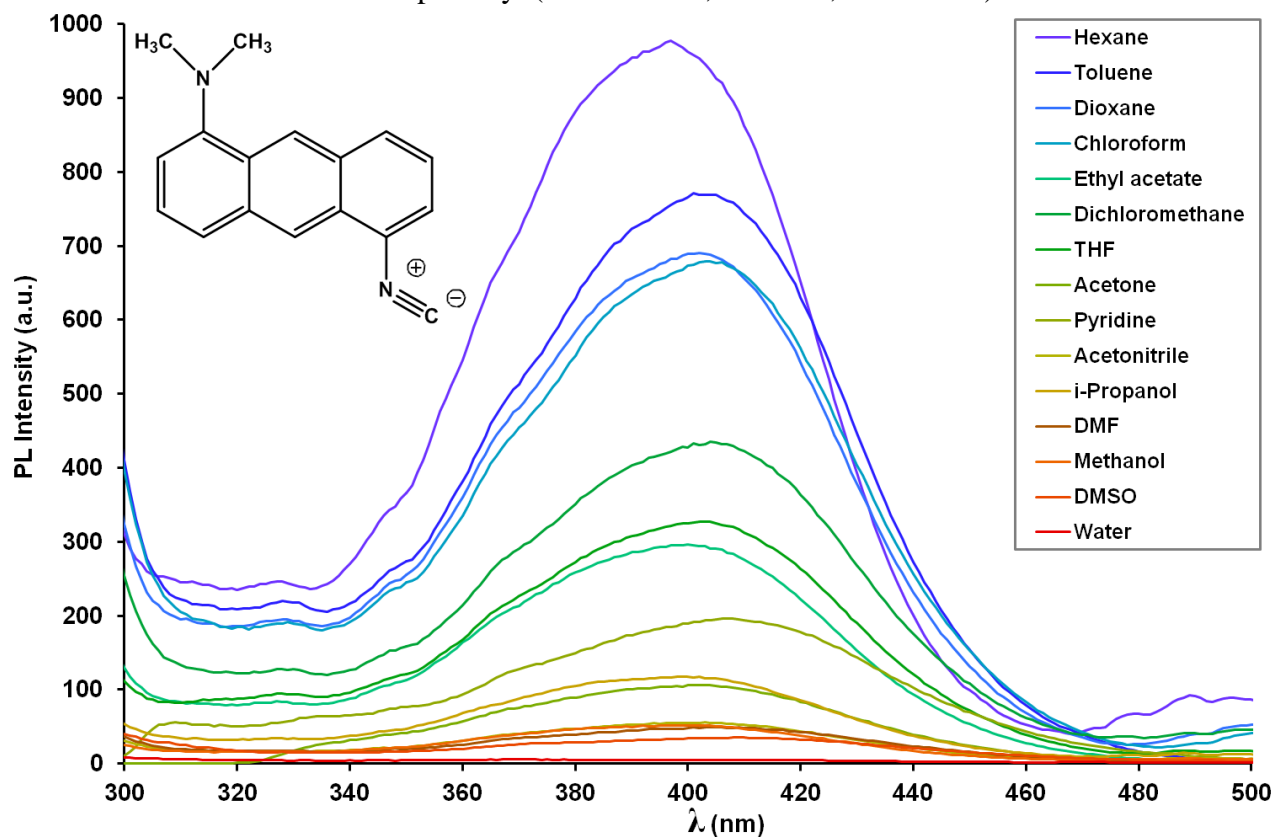

**Figure S73.** The excitation spectra of 1-N,N-dimethylamino-5-isocyanoanthracene (DIMICAA) recorded in solvents of different polarity. ( $c=5\times10^{-5}$  M,  $T=20$  °C,  $V=3.00$  ml).

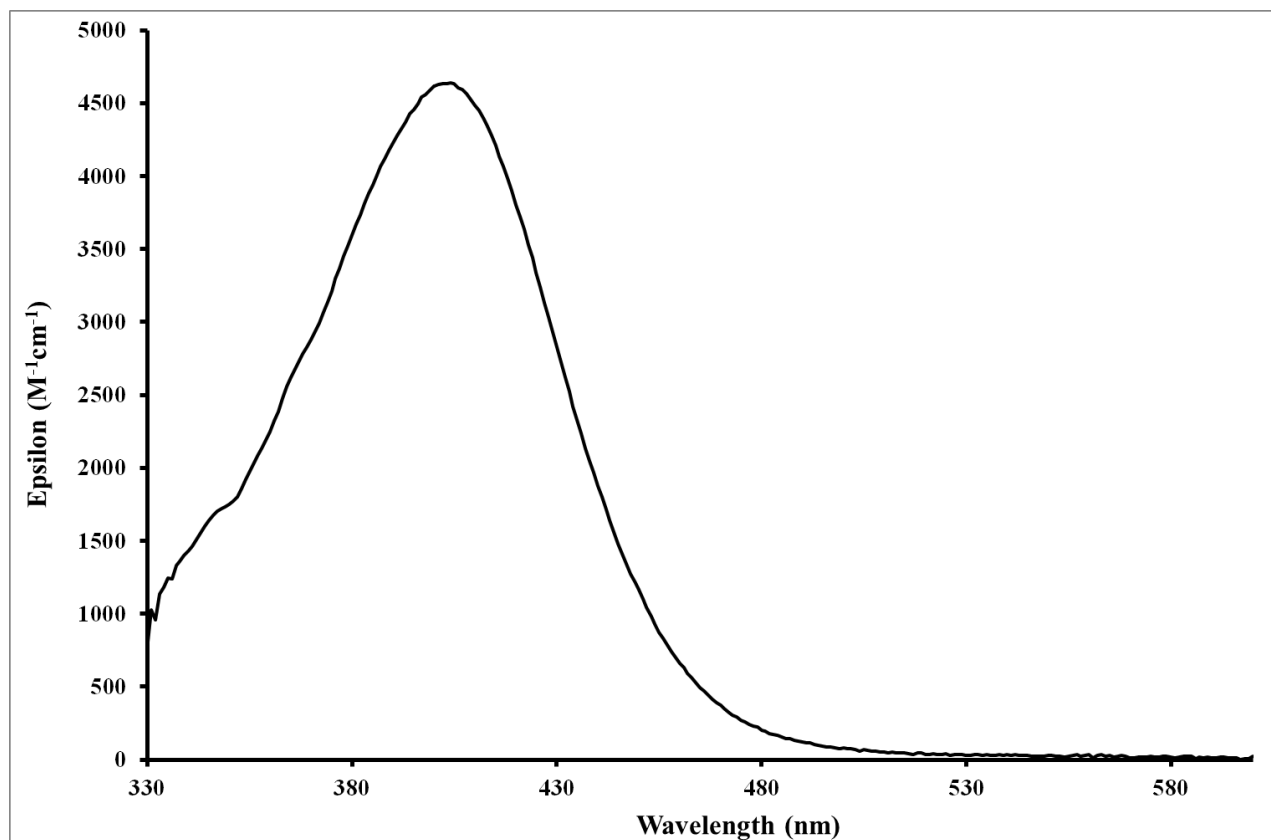

**Figure S74.** The UV-vis spectrum of (DIMICAA) recorded in acetone

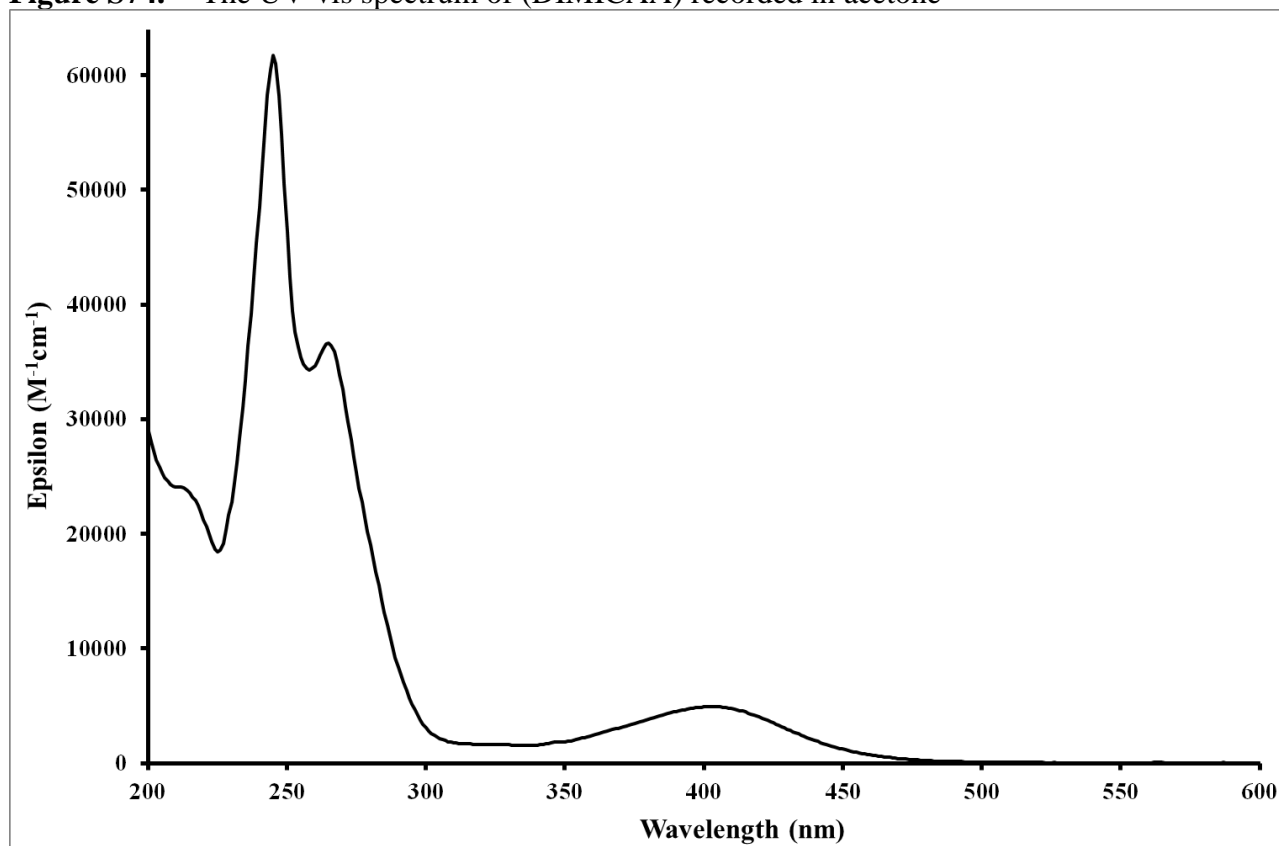

**Figure S75.** The UV-vis spectrum of (DIMICAA) recorded in acetonitrile

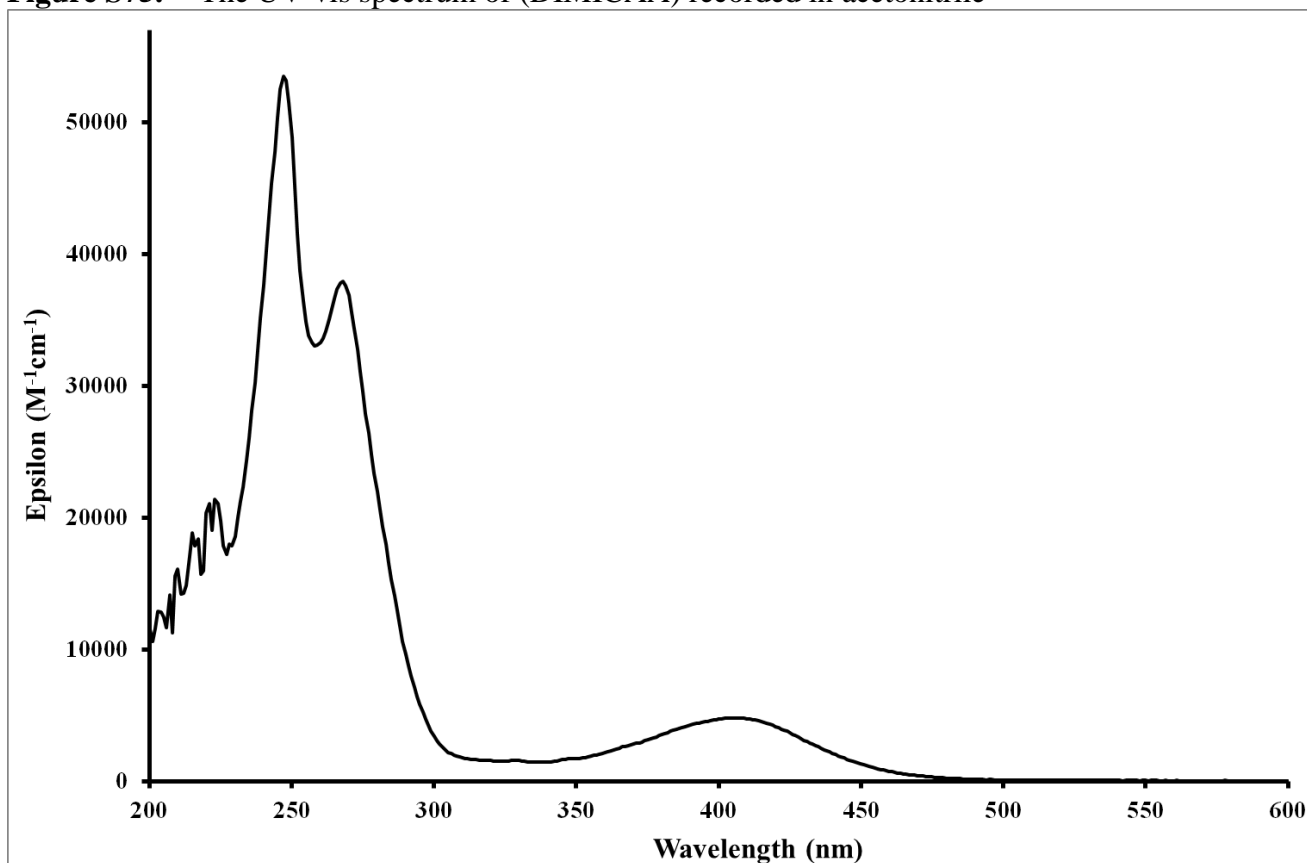

**Figure S76.** The UV-vis spectrum of (DIMICAA) recorded in methylene-chloride

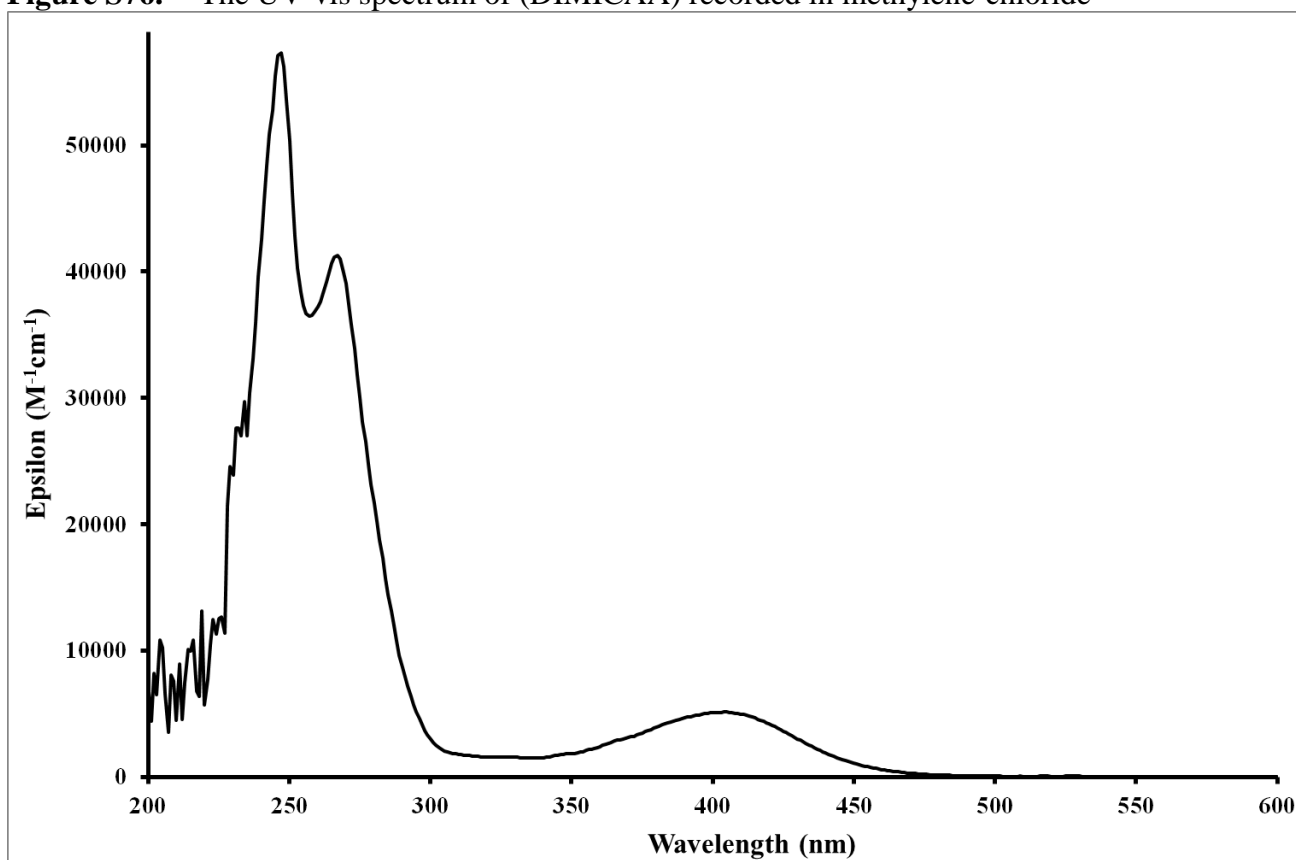

**Figure S77.** Dioxane The UV-vis spectrum of (DIMICAA) recorded in dioxane

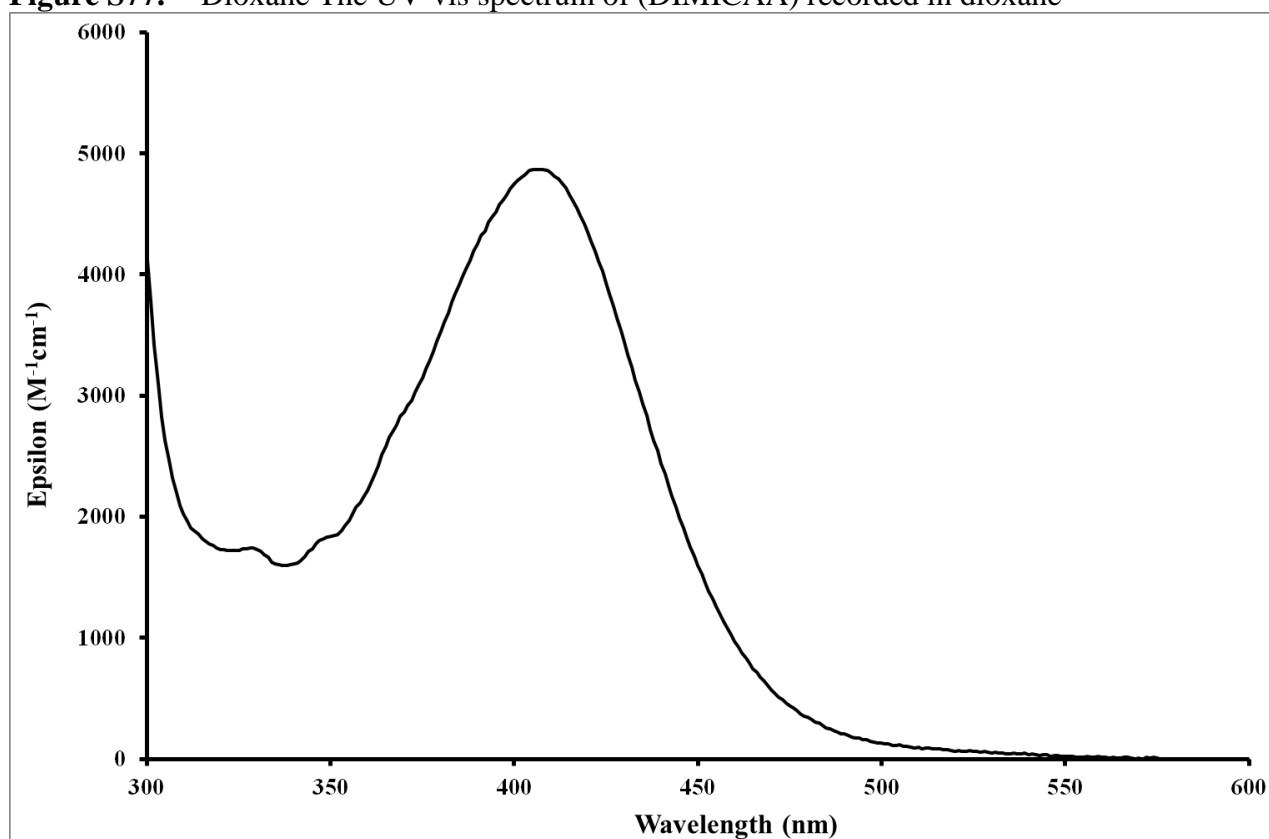

**Figure S78.** The UV-vis spectrum of (DIMICAA) recorded in DMF

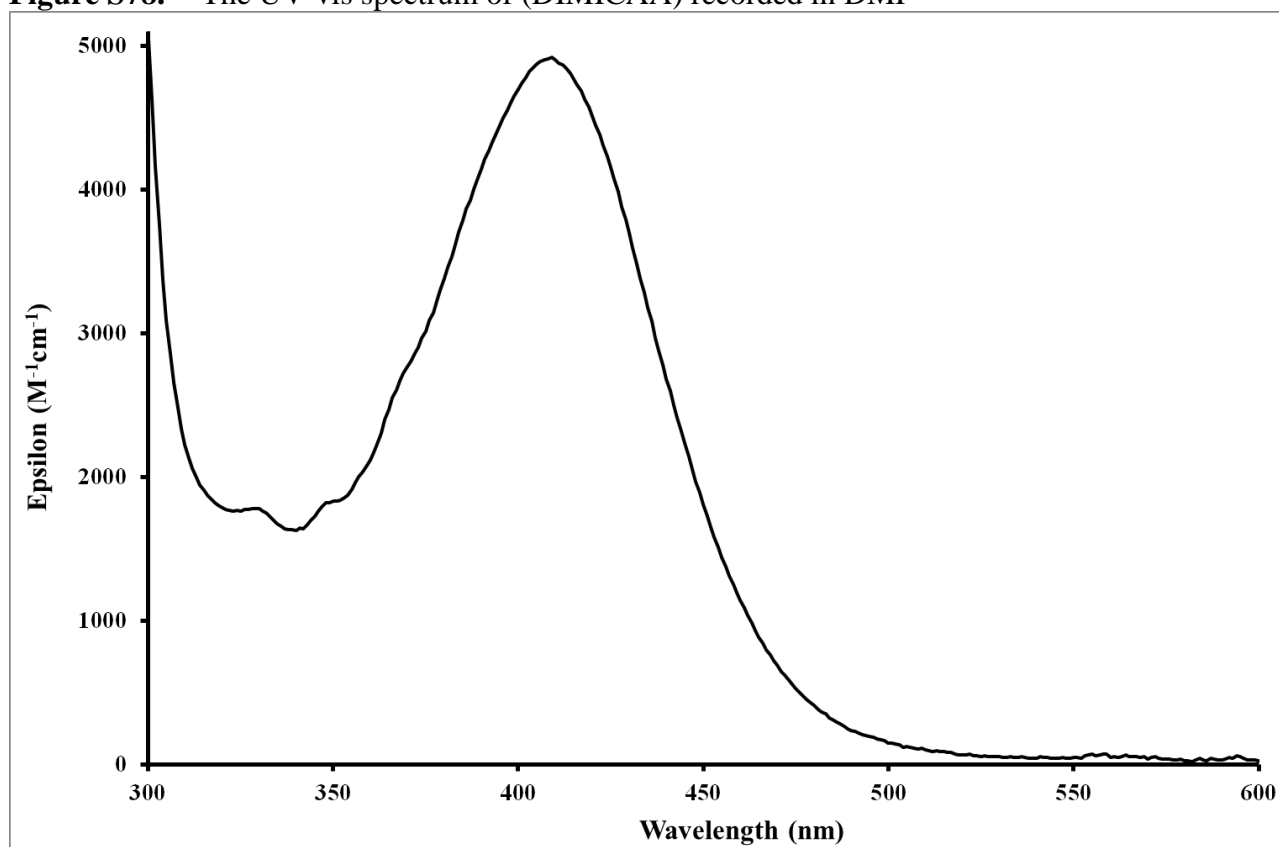

**Figure S79.** The UV-vis spectrum of (DIMICAA) recorded in DMSO

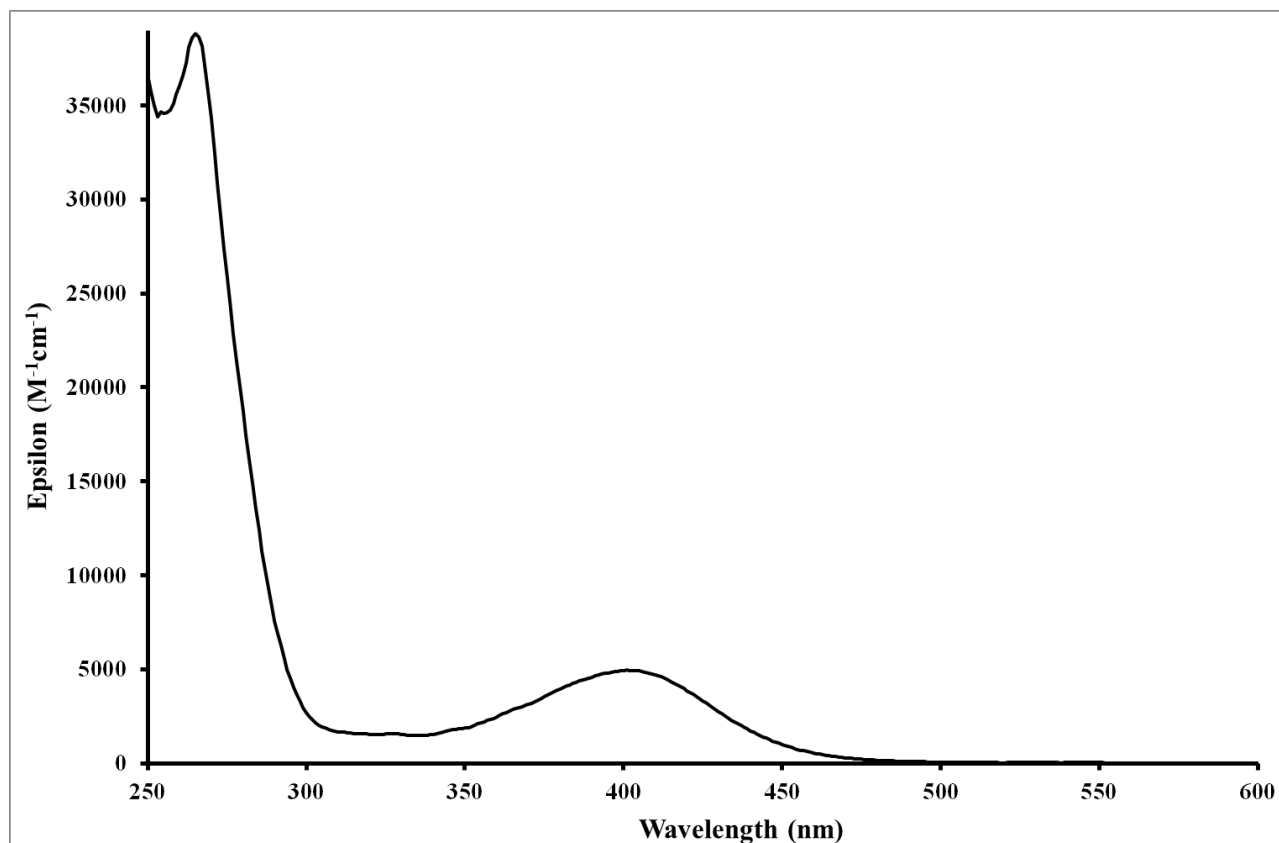

**Figure S80.** The UV-vis spectrum of (DIMICAA) recorded in EtOAc

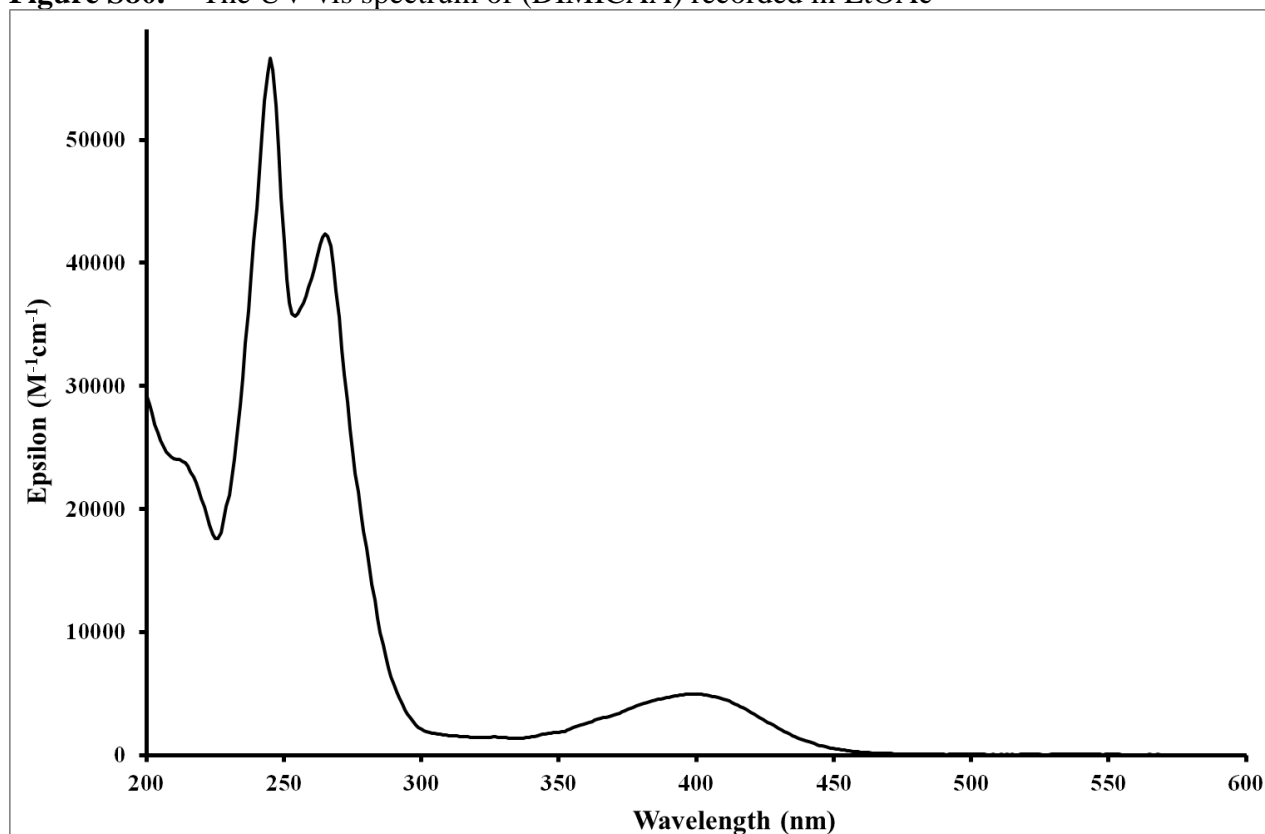

**Figure S81.** The UV-vis spectrum of (DIMICAA) recorded in hexane

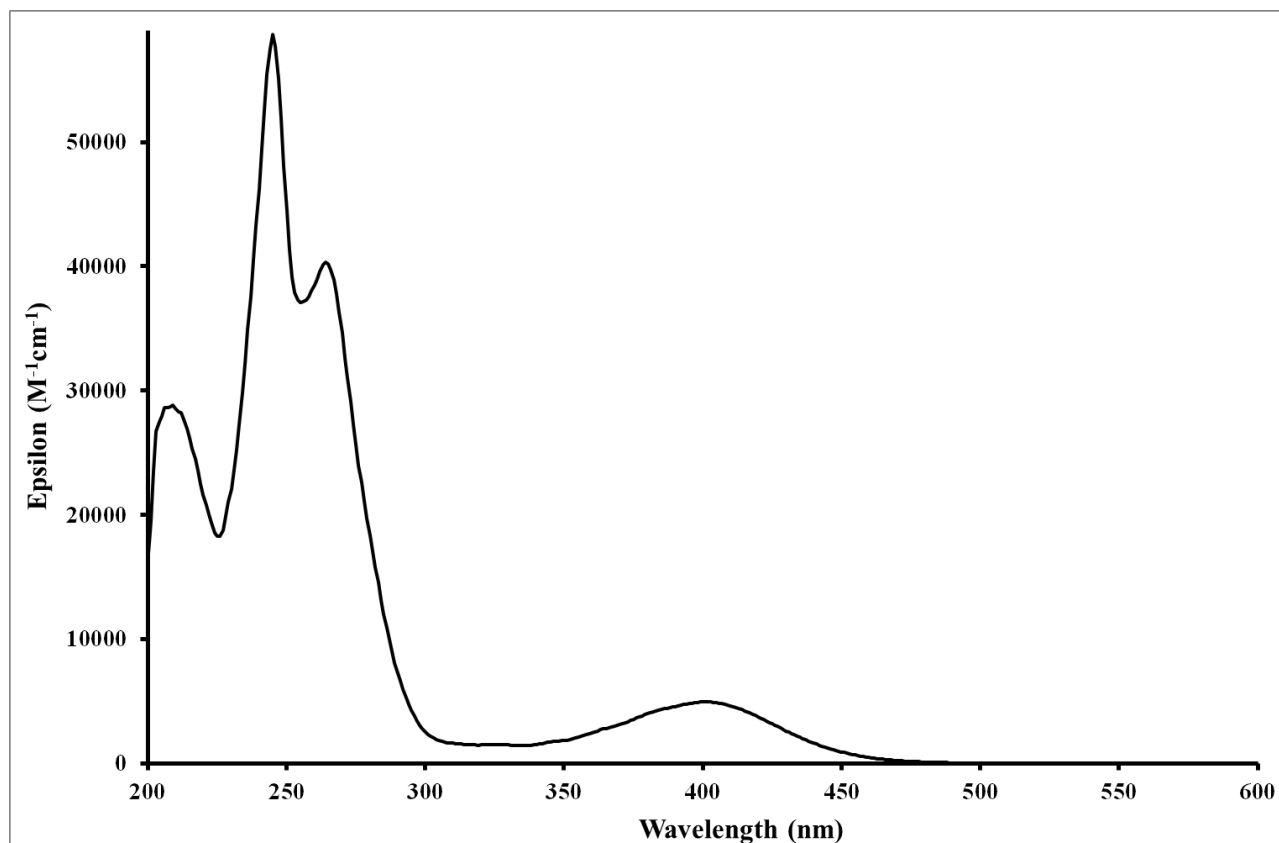

**Figure S82.** The UV-vis spectrum of (DIMICAA) recorded in isopropanol

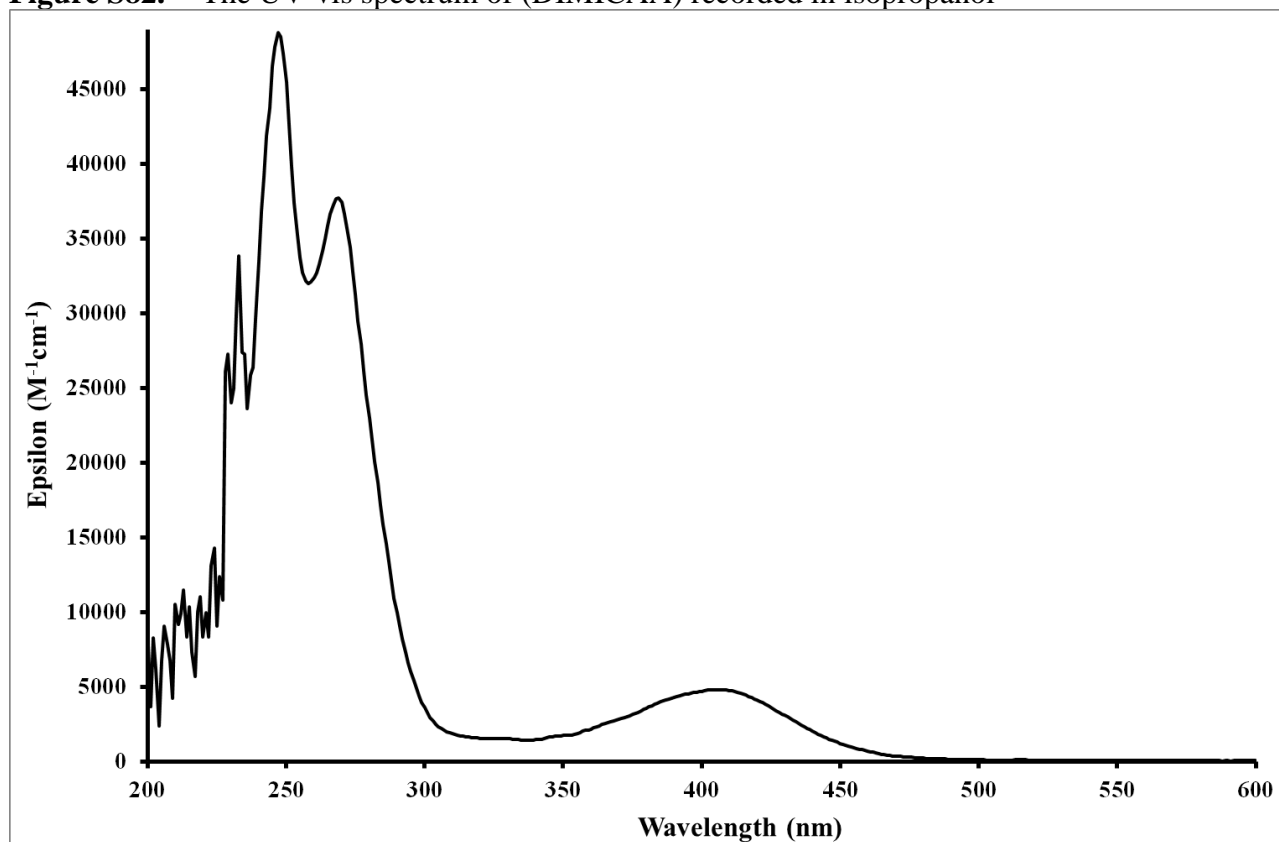

**Figure S83.** The UV-vis spectrum of (DIMICAA) recorded in chloroform



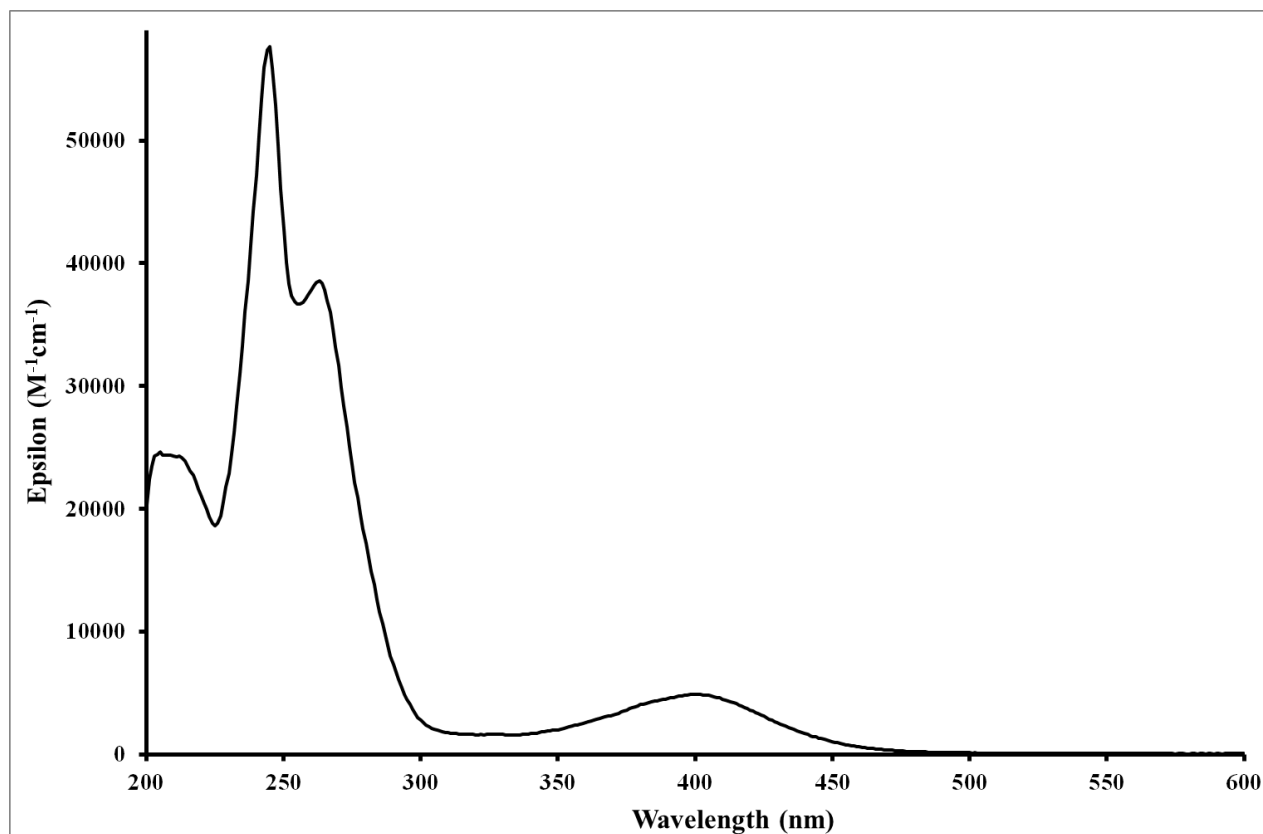

**Figure S84.** The UV-vis spectrum of (DIMICAA) recorded in methanol

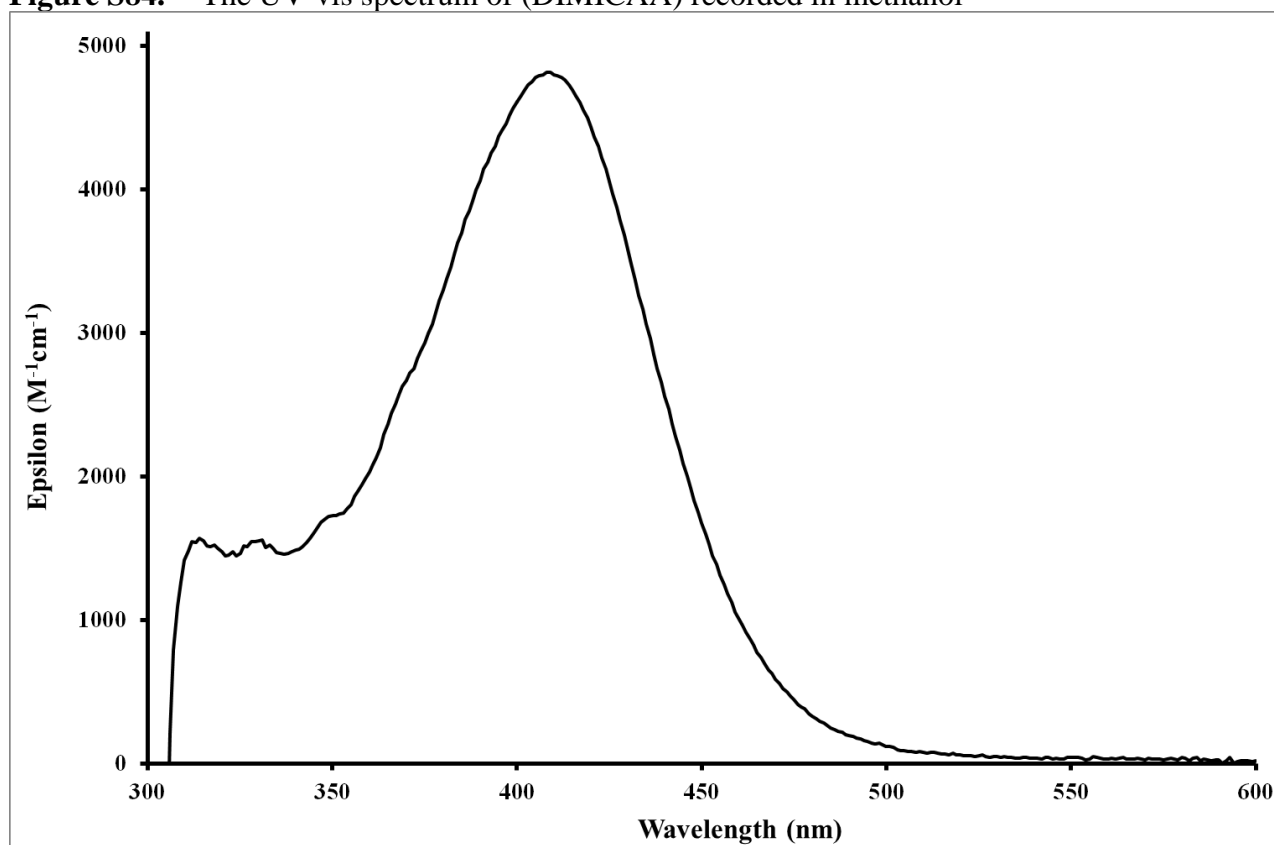

**Figure S85.** The UV-vis spectrum of (DIMICAA) recorded in pyridine

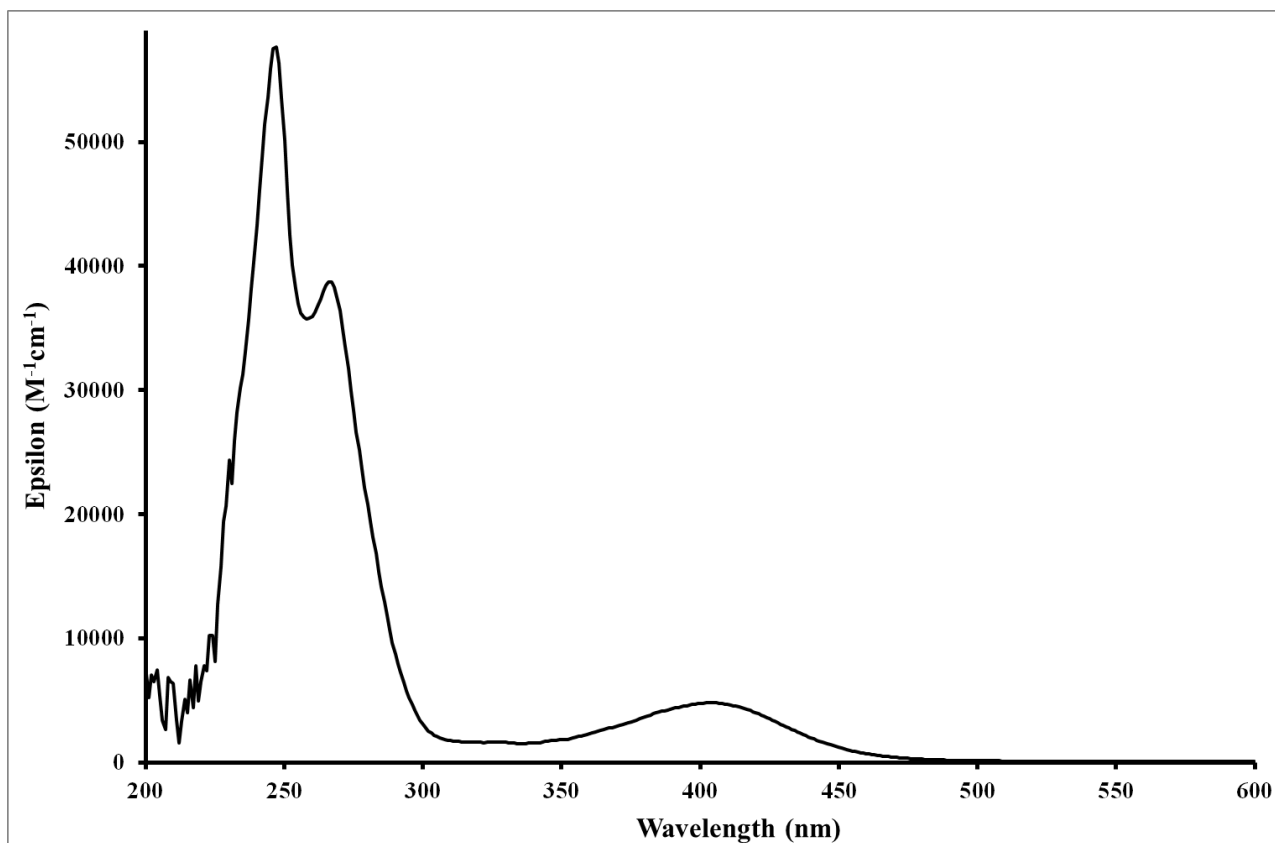

**Figure S86.** The UV-vis spectrum of (DIMICAA) recorded in tetrahydrofuran

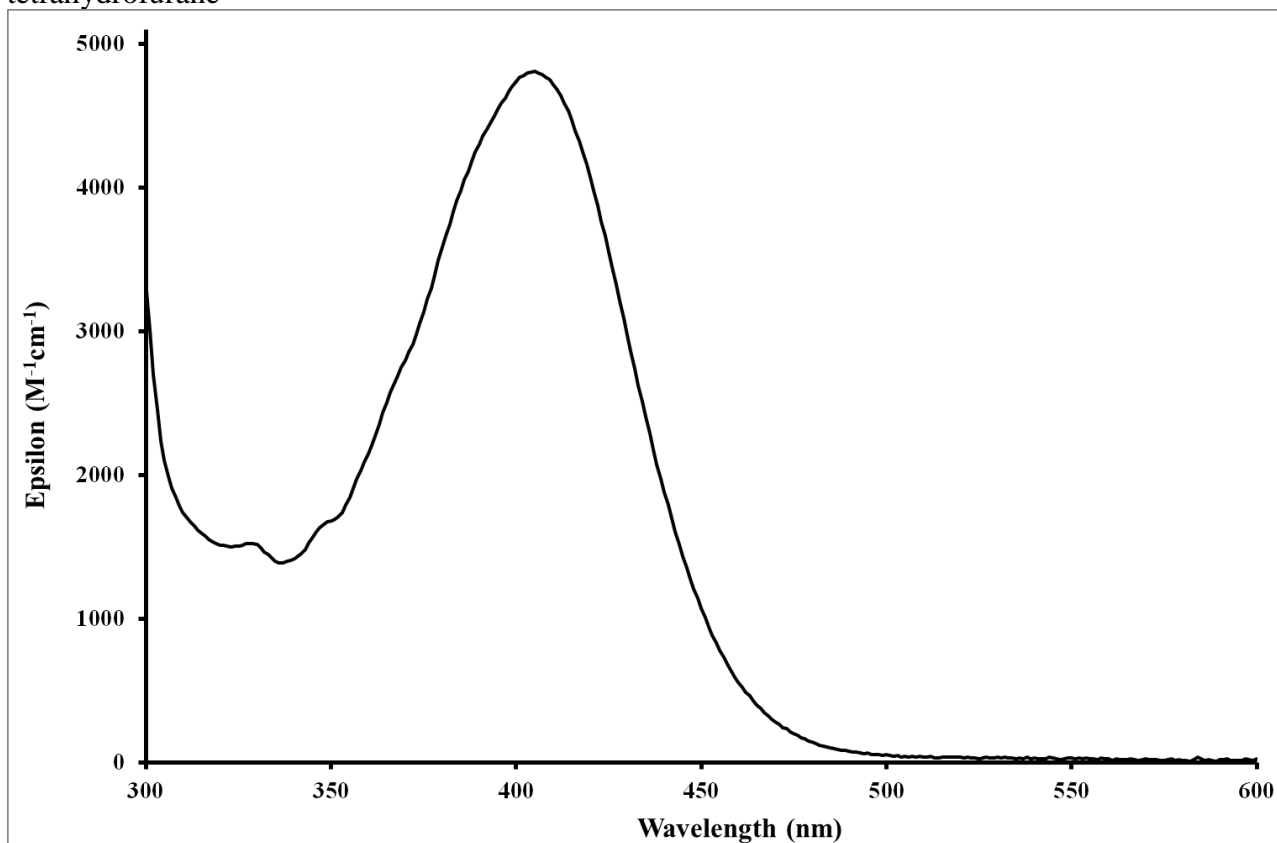

**Figure S87.** The UV-vis spectrum of (DIMICAA) recorded in toluene

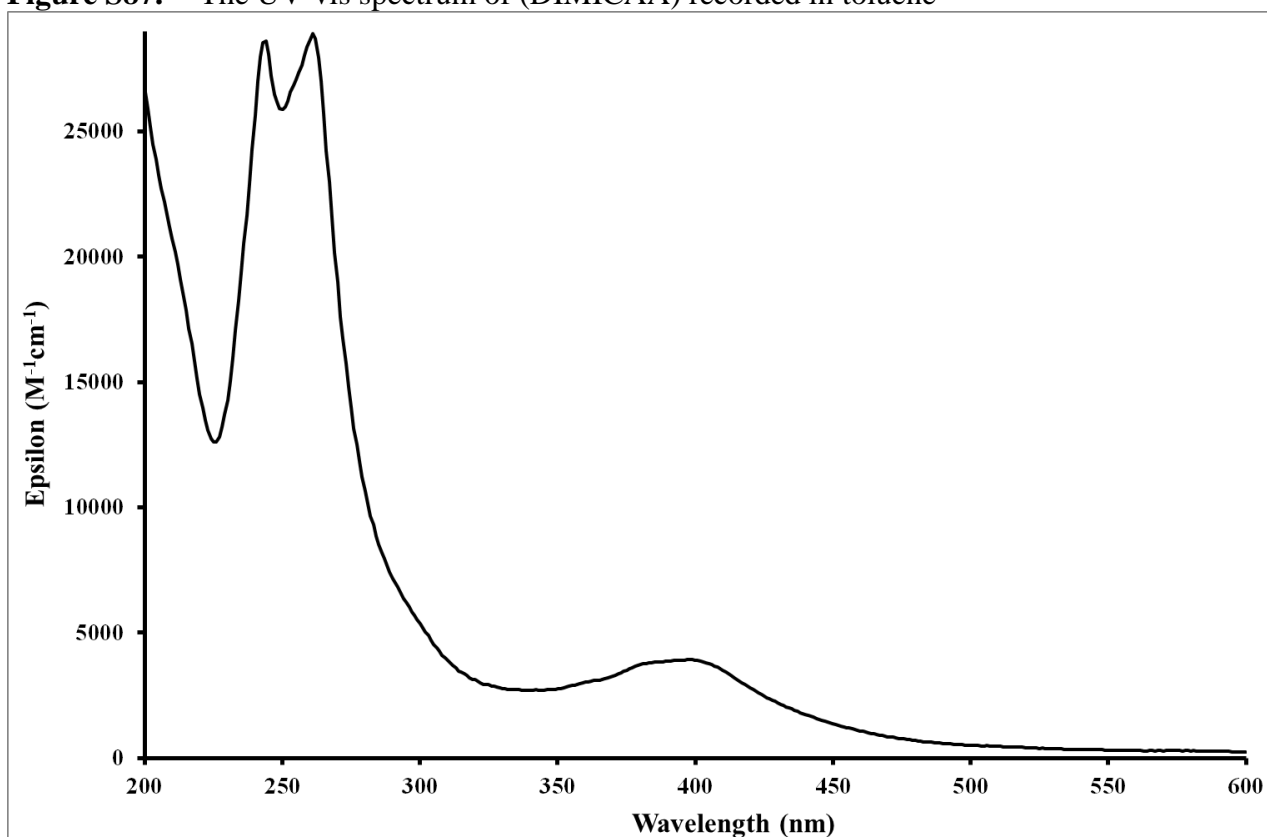

**Figure S88.** The UV-vis spectrum of (DIMICAA) recorded in water

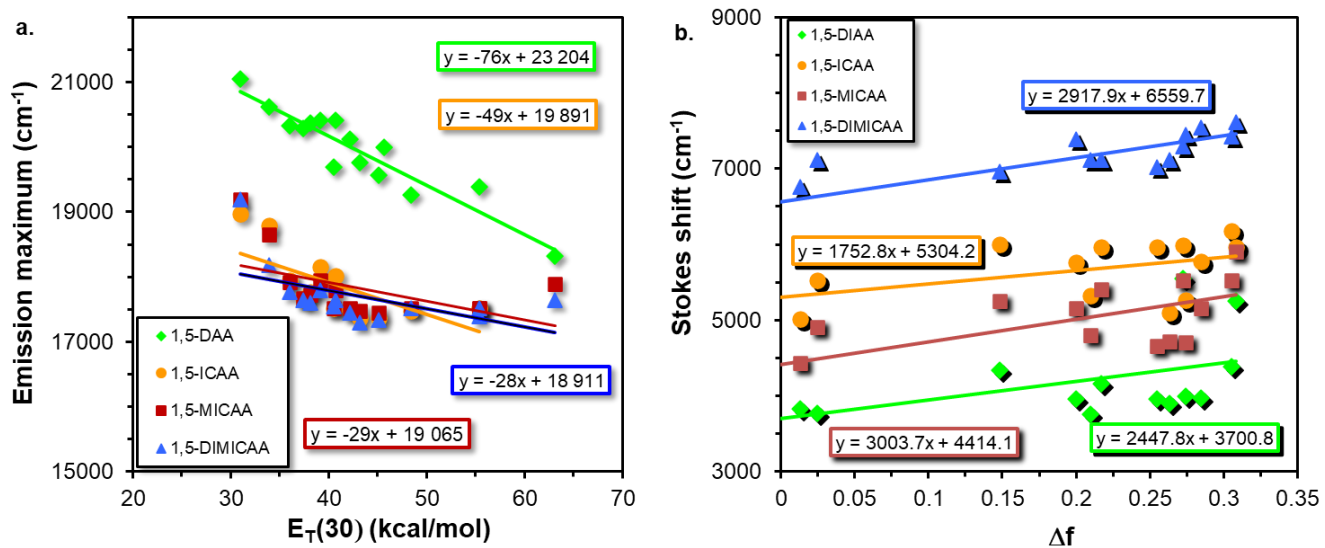

**Figure S89.** Variation of the fluorescence emission maximum with the empirical solvent polarity parameter  $E_T(30)$  (a) and the Lippert-Mataga (LM) (b) plots for the 1,5-disubstituted anthracene dyes.
